# Supplementary material for: Mycobacterial Metallophosphatase MmpE acts as a Nucleomodulin to Regulate Host Gene Expression and Promote Intracellular Survival
Source: bioRxiv preprint, doi:10.1101/2025.06.24.661236, version 2 (2025-12-23)
Supplement: Table S3 2903 candidate MmpE-specific ChIP-seq signals [file 661236_file04.xlsx]

## Sheet: Sheet 1
The list of 2903 candidate Mtb MmpE-specific ChIP-seq signals
Chr	Peak ID	Peak Start	Peak End	Log2FoldChange	Annotation	Distance to TSS	Gene ID	Gene Name	Gene Type	Gene Description
Chr8	8_127744994_127745194	127744995	127745194	4.62135	Distal Intergenic	5922	ENSG00000136997	MYC	protein_coding	MYC proto-oncogene, bHLH transcription factor
Chr15	15_78520737_78521032	78520738	78521032	4.51444	Intron	7649	ENSG00000188266	HYKK	protein_coding	hydroxylysine kinase
Chr2	2_37999513_37999801	37999514	37999801	4.51444	Intron	-3067	ENSG00000115841	RMDN2	protein_coding	regulator of microtubule dynamics 2
Chr18	18_13826217_13826504	13826218	13826504	4.39896	Promoter (<=1kb)	674	ENSG00000176136	MC5R	protein_coding	melanocortin 5 receptor
Chr11	11_19820858_19821179	19820859	19821179	4.39896	Intron	7141	ENSG00000166833	NAV2	protein_coding	neuron navigator 2
Chr12	12_63600875_63601075	63600876	63601075	4.27343	Intron	7599	ENSG00000177990	DPY19L2	protein_coding	dpy-19 like 2
Chr16	16_22256949_22257149	22256950	22257149	4.27343	Promoter (<=1kb)	-495	ENSG00000103319	EEF2K	protein_coding	eukaryotic elongation factor 2 kinase
Chr16	16_56279295_56279495	56279296	56279495	4.27343	Intron	3290	ENSG00000087258	GNAO1	protein_coding	G protein subunit alpha o1
Chr3	3_7464879_7465079	7464880	7465079	4.27343	Intron	3187	ENSG00000196277	GRM7	protein_coding	glutamate metabotropic receptor 7
Chr12	12_69939034_69939367	69939035	69939367	4.27343	Intron	3079	ENSG00000166268	MYRFL	protein_coding	myelin regulatory factor like
Chr2	2_173034592_173034792	173034593	173034792	4.27343	Intron	7967	ENSG00000091428	RAPGEF4	protein_coding	Rap guanine nucleotide exchange factor 4
Chr13	13_113634687_113634887	113634688	113634887	4.27343	Promoter (2-3kb)	-2264	ENSG00000198176	TFDP1	protein_coding	transcription factor Dp-1
Chr2	2_70564992_70565192	70564993	70565192	4.27343	Distal Intergenic	-10800	ENSG00000163235	TGFA	protein_coding	transforming growth factor alpha
Chr17	17_68465561_68465761	68465562	68465761	4.27343	Intron	-8049	ENSG00000070540	WIPI1	protein_coding	WD repeat domain, phosphoinositide interacting 1
Chr7	7_97064484_97064684	97064485	97064684	4.13593	Distal Intergenic	-39535	ENSG00000105880	DLX5	protein_coding	distal-less homeobox 5
Chr8	8_94700686_94700886	94700687	94700886	4.13593	Intron	-4768	ENSG00000104413	ESRP1	protein_coding	epithelial splicing regulatory protein 1
Chr10	10_116126288_116126488	116126289	116126488	4.13593	Intron	129307	ENSG00000151892	GFRA1	protein_coding	GDNF family receptor alpha 1
Chr19	19_7144438_7144638	7144439	7144638	4.13593	Promoter (1-2kb)	-1399	ENSG00000171105	INSR	protein_coding	insulin receptor
Chr5	5_149847221_149847528	149847222	149847528	4.13593	Promoter (1-2kb)	1579	ENSG00000155846	PPARGC1B	protein_coding	PPARG coactivator 1 beta
Chr7	7_85083706_85083906	85083707	85083906	4.13593	Intron	-27942	ENSG00000153993	SEMA3D	protein_coding	semaphorin 3D
Chr1	1_84652579_84652779	84652580	84652779	4.13593	Promoter (<=1kb)	-139	ENSG00000117155	SSX2IP	protein_coding	SSX family member 2 interacting protein
Chr7	7_129878389_129878589	129878390	129878589	4.13593	Promoter (2-3kb)	2387	ENSG00000186591	UBE2H	protein_coding	ubiquitin conjugating enzyme E2 H
Chr10	10_79464275_79464498	79464276	79464498	4.13593	Distal Intergenic	-18652	ENSG00000165424	ZCCHC24	protein_coding	zinc finger CCHC-type containing 24
Chr19	19_12151424_12151624	12151425	12151624	4.13593	Intron	-3623	ENSG00000257591	ZNF625	protein_coding	zinc finger protein 625
Chr9	9_69606699_69606899	69606700	69606899	3.98392	Intron	65472	ENSG00000107282	APBA1	protein_coding	amyloid beta precursor protein binding family A member 1
Chr10	10_99962414_99962694	99962415	99962694	3.98392	Intron	-31419	ENSG00000107554	DNMBP	protein_coding	dynamin binding protein
Chr2	2_96676986_96677186	96676987	96677186	3.98392	Intron	6769	ENSG00000249715	FER1L5	protein_coding	fer-1 like family member 5
Chr11	11_125530676_125530876	125530677	125530876	3.98392	Intron	-34360	ENSG00000149557	FEZ1	protein_coding	fasciculation and elongation protein zeta 1
ChrX	X_150329010_150329255	150329011	150329255	3.98392	Distal Intergenic	-32167	ENSG00000013619	MAMLD1	protein_coding	mastermind like domain containing 1
Chr9	9_125212716_125212916	125212717	125212916	3.98392	Intron	12112	ENSG00000136933	RABEPK	protein_coding	Rab9 effector protein with kelch motifs
Chr2	2_101462074_101462274	101462075	101462274	3.98392	Intron	12001	ENSG00000196460	RFX8	protein_coding	regulatory factor X8
Chr3	3_160409271_160409471	160409272	160409471	3.98392	Promoter (2-3kb)	-2287	ENSG00000113810	SMC4	protein_coding	structural maintenance of chromosomes 4
Chr8	8_133443574_133443809	133443575	133443809	3.98392	Distal Intergenic	32125	ENSG00000008513	ST3GAL1	protein_coding	ST3 beta-galactoside alpha-2,3-sialyltransferase 1
Chr15	15_70672788_70672988	70672789	70672988	3.98392	Promoter (<=1kb)	-816	ENSG00000137831	UACA	protein_coding	uveal autoantigen with coiled-coil domains and ankyrin repeats
Chr9	9_96561523_96561723	96561524	96561723	3.814	Intron	3113	ENSG00000081377	CDC14B	protein_coding	cell division cycle 14B
Chr18	18_74575915_74576115	74575916	74576115	3.814	Promoter (<=1kb)	-165	ENSG00000150656	CNDP1	protein_coding	carnosine dipeptidase 1
Chr5	5_138282585_138282785	138282586	138282785	3.814	Downstream (2-3kb)	-7965	ENSG00000146013	GFRA3	protein_coding	GDNF family receptor alpha 3
Chr15	15_40633174_40633374	40633175	40633374	3.814	Intron	5101	ENSG00000137812	KNL1	protein_coding	kinetochore scaffold 1
Chr15	15_52423250_52423450	52423251	52423450	3.814	Promoter (2-3kb)	2517	ENSG00000197535	MYO5A	protein_coding	myosin VA
Chr7	7_77714669_77714869	77714670	77714869	3.814	Intron	17519	ENSG00000187257	RSBN1L	protein_coding	round spermatid basic protein 1 like
Chr2	2_98632914_98633114	98632915	98633114	3.814	Intron	16518	ENSG00000115446	UNC50	protein_coding	unc-50 inner nuclear membrane RNA binding protein
Chr13	13_53015466_53015875	53015467	53015875	3.72089	Distal Intergenic	-12938	ENSG00000102837	OLFM4	protein_coding	olfactomedin 4
Chr2	2_44760906_44761106	44760907	44761106	3.62135	Intron	84313	ENSG00000143919	CAMKMT	protein_coding	calmodulin-lysine N-methyltransferase
Chr10	10_12967788_12967988	12967789	12967988	3.62135	Intron	33725	ENSG00000151468	CCDC3	protein_coding	coiled-coil domain containing 3
Chr7	7_127576069_127576269	127576070	127576269	3.62135	Distal Intergenic	9327	ENSG00000179562	GCC1	protein_coding	GRIP and coiled-coil domain containing 1
Chr17	17_38943950_38944150	38943951	38944150	3.62135	Intron	18783	ENSG00000263874	LASP1NB	protein_coding	LASP1 neighbor
Chr12	12_93486825_93487025	93486826	93487025	3.62135	Intron	-13722	ENSG00000198015	MRPL42	protein_coding	mitochondrial ribosomal protein L42
Chr12	12_57306525_57306725	57306526	57306725	3.62135	Intron	-3346	ENSG00000179912	R3HDM2	protein_coding	R3H domain containing 2
Chr5	5_129006349_129006549	129006350	129006549	3.62135	Intron	40822	ENSG00000113396	SLC27A6	protein_coding	solute carrier family 27 member 6
Chr1	1_117623695_117623895	117623696	117623895	3.62135	Exon	17648	ENSG00000183508	TENT5C	protein_coding	terminal nucleotidyltransferase 5C
ChrX	X_41220524_41220730	41220525	41220730	3.62135	Intron	-8253	ENSG00000124486	USP9X	protein_coding	ubiquitin specific peptidase 9 X-linked
ChrX	X_15797299_15797499	15797300	15797499	3.62135	Promoter (1-2kb)	1158	ENSG00000169249	ZRSR2	protein_coding	zinc finger CCCH-type, RNA binding motif and serine/arginine rich 2
Chr12	12_111692341_111692541	111692342	111692541	3.39896	Intron	6260	ENSG00000111271	ACAD10	protein_coding	acyl-CoA dehydrogenase family member 10
Chr3	3_123398650_123398850	123398651	123398850	3.39896	Intron	5433	ENSG00000173175	ADCY5	protein_coding	adenylate cyclase 5
Chr8	8_56951202_56951402	56951203	56951402	3.39896	Distal Intergenic	28710	ENSG00000104331	BPNT2	protein_coding	3'(2'), 5'-bisphosphate nucleotidase 2
Chr18	18_59669798_59669998	59669799	59669998	3.39896	Intron	-3509	ENSG00000183287	CCBE1	protein_coding	collagen and calcium binding EGF domains 1
Chr2	2_55396651_55396851	55396652	55396851	3.39896	Promoter (<=1kb)	520	ENSG00000115355	CCDC88A	protein_coding	coiled-coil domain containing 88A
Chr6	6_74987204_74987404	74987205	74987404	3.39896	Distal Intergenic	101136	ENSG00000111799	COL12A1	protein_coding	collagen type XII alpha 1 chain
ChrX	X_108432436_108432636	108432437	108432636	3.39896	Intron	5786	ENSG00000197565	COL4A6	protein_coding	collagen type IV alpha 6 chain
ChrX	X_88666228_88666428	88666229	88666428	3.39896	Distal Intergenic	-80797	ENSG00000147183	CPXCR1	protein_coding	CPX chromosome region candidate 1
Chr19	19_10803702_10803902	10803703	10803902	3.39896	Promoter (1-2kb)	-1078	ENSG00000079805	DNM2	protein_coding	dynamin 2
Chr2	2_169548654_169548890	169548655	169548890	3.39896	Intron	-8531	ENSG00000138399	FASTKD1	protein_coding	FAST kinase domains 1
Chr9	9_120679593_120679793	120679594	120679793	3.39896	Intron	34677	ENSG00000106780	MEGF9	protein_coding	multiple EGF like domains 9
Chr7	7_131284539_131284739	131284540	131284739	3.39896	Promoter (<=1kb)	-323	ENSG00000128585	MKLN1	protein_coding	muskelin 1
Chr11	11_114638663_114639098	114638664	114639098	3.39896	Distal Intergenic	-39429	ENSG00000204361	NXPE2	protein_coding	neurexophilin and PC-esterase domain family member 2
Chr9	9_78364426_78364626	78364427	78364626	3.39896	Distal Intergenic	67284	ENSG00000135069	PSAT1	protein_coding	phosphoserine aminotransferase 1
Chr11	11_14325264_14325464	14325265	14325464	3.39896	Intron	11702	ENSG00000133818	RRAS2	protein_coding	RAS related 2
Chr8	8_100670848_100671218	100670849	100671218	3.39896	Distal Intergenic	-7434	ENSG00000174226	SNX31	protein_coding	sorting nexin 31
Chr13	13_97969077_97969279	97969078	97969279	3.27343	Promoter (<=1kb)	-502	ENSG00000065150	IPO5	protein_coding	importin 5
Chr4	4_75886243_75886443	75886244	75886443	3.27343	Promoter (1-2kb)	-1421	ENSG00000156194	PPEF2	protein_coding	protein phosphatase with EF-hand domain 2
Chr1	1_19735088_19735288	19735089	19735288	3.27343	Intron	3131	ENSG00000162542	TMCO4	protein_coding	transmembrane and coiled-coil domains 4
Chr12	12_109069777_109069977	109069778	109069977	3.27343	Promoter (2-3kb)	2184	ENSG00000135093	USP30	protein_coding	ubiquitin specific peptidase 30
Chr2	2_9582189_9582389	9582190	9582389	3.13593	Downstream (1-2kb)	-25458	ENSG00000151694	ADAM17	protein_coding	ADAM metallopeptidase domain 17
Chr9	9_94950491_94950714	94950492	94950714	3.13593	Intron	-5232	ENSG00000148120	AOPEP	protein_coding	aminopeptidase O (putative)
Chr11	11_8936729_8936929	8936730	8936929	3.13593	Downstream (<1kb)	-3724	ENSG00000176029	C11orf16	protein_coding	chromosome 11 open reading frame 16
Chr7	7_134773942_134774142	134773943	134774142	3.13593	Intron	-5278	ENSG00000122786	CALD1	protein_coding	caldesmon 1
Chr6	6_15577493_15577693	15577494	15577693	3.13593	Intron	8322	ENSG00000047579	DTNBP1	protein_coding	dystrobrevin binding protein 1
Chr17	17_29970574_29970774	29970575	29970774	3.13593	Promoter (1-2kb)	1369	ENSG00000176927	EFCAB5	protein_coding	EF-hand calcium binding domain 5
Chr2	2_46315604_46315804	46315605	46315804	3.13593	Intron	17841	ENSG00000116016	EPAS1	protein_coding	endothelial PAS domain protein 1
ChrX	X_104376426_104376626	104376427	104376626	3.13593	Distal Intergenic	-121494	ENSG00000123576	ESX1	protein_coding	ESX homeobox 1
Chr4	4_151504954_151505154	151504955	151505154	3.13593	Intron	22346	ENSG00000164142	FHIP1A	protein_coding	FHF complex subunit HOOK interacting protein 1A
Chr6	6_159898874_159899074	159898875	159899074	3.13593	Intron	-7616	ENSG00000130368	MAS1	protein_coding	MAS1 proto-oncogene, G protein-coupled receptor
Chr16	16_47067188_47067388	47067189	47067388	3.13593	Distal Intergenic	42246	ENSG00000171208	NETO2	protein_coding	neuropilin and tolloid like 2
Chr1	1_61334025_61334225	61334026	61334225	3.13593	Intron	56720	ENSG00000162599	NFIA	protein_coding	nuclear factor I A
ChrX	X_55075166_55075471	55075167	55075471	3.13593	Promoter (<=1kb)	104	ENSG00000238269	PAGE2B	protein_coding	PAGE family member 2B
Chr20	20_34666798_34666998	34666799	34666998	3.13593	Intron	10087	ENSG00000101464	PIGU	protein_coding	phosphatidylinositol glycan anchor biosynthesis class U
Chr8	8_18903143_18903343	18903144	18903343	3.13593	Intron	-16110	ENSG00000156011	PSD3	protein_coding	pleckstrin and Sec7 domain containing 3
Chr8	8_100231374_100231574	100231375	100231574	3.13593	Promoter (1-2kb)	-1597	ENSG00000104450	SPAG1	protein_coding	sperm associated antigen 1
Chr7	7_11476679_11476879	11476680	11476879	3.13593	Intron	66180	ENSG00000005108	THSD7A	protein_coding	thrombospondin type 1 domain containing 7A
Chr5	5_178900928_178901128	178900929	178901128	3.13593	Intron	5014	ENSG00000198939	ZFP2	protein_coding	ZFP2 zinc finger protein
Chr18	18_79374399_79374707	79374400	79374707	3.06192	Promoter (2-3kb)	2010	ENSG00000166377	ATP9B	protein_coding	ATPase phospholipid transporting 9B (putative)
Chr14	14_99725387_99725587	99725388	99725587	3.03639	3' UTR	7705	ENSG00000036530	CYP46A1	protein_coding	cytochrome P450 family 46 subfamily A member 1
Chr3	3_69920742_69920984	69920743	69920984	3.03639	Intron	-15603	ENSG00000187098	MITF	protein_coding	melanocyte inducing transcription factor
Chr4	4_113178146_113178346	113178147	113178346	2.98392	Intron	3704	ENSG00000145362	ANK2	protein_coding	ankyrin 2
Chr2	2_231228408_231228608	231228409	231228608	2.98392	Intron	6484	ENSG00000135931	ARMC9	protein_coding	armadillo repeat containing 9
Chr7	7_105623903_105624146	105623904	105624146	2.98392	Promoter (<=1kb)	120	ENSG00000146776	ATXN7L1	protein_coding	ataxin 7 like 1
Chr9	9_98610117_98610317	98610118	98610317	2.98392	Promoter (2-3kb)	-2468	ENSG00000136928	GABBR2	protein_coding	gamma-aminobutyric acid type B receptor subunit 2
Chr16	16_27698434_27698634	27698435	27698634	2.98392	Promoter (<=1kb)	107	ENSG00000047578	KATNIP	protein_coding	katanin interacting protein
Chr8	8_8822399_8822599	8822400	8822599	2.98392	Promoter (<=1kb)	-265	ENSG00000147324	MFHAS1	protein_coding	multifunctional ROCO family signaling regulator 1
Chr14	14_64414034_64414234	64414035	64414234	2.98392	Promoter (1-2kb)	-1404	ENSG00000100714	MTHFD1	protein_coding	methylenetetrahydrofolate dehydrogenase, cyclohydrolase and formyltetrahydrofolate synthetase 1
Chr17	17_31477267_31477467	31477268	31477467	2.98392	Intron	-10533	ENSG00000131242	RAB11FIP4	protein_coding	RAB11 family interacting protein 4
Chr16	16_19180389_19180589	19180390	19180589	2.98392	Promoter (<=1kb)	218	ENSG00000103528	SYT17	protein_coding	synaptotagmin 17
Chr10	10_100081307_100081567	100081308	100081567	2.92947	Promoter (<=1kb)	302	ENSG00000120054	CPN1	protein_coding	carboxypeptidase N subunit 1
Chr1	1_151100282_151100509	151100283	151100509	2.92947	Intron	7037	ENSG00000143458	GABPB2	protein_coding	GA binding protein transcription factor subunit beta 2
Chr7	7_18573608_18573894	18573609	18573894	2.92947	Intron	64296	ENSG00000048052	HDAC9	protein_coding	histone deacetylase 9
Chr8	8_2044612_2044845	2044613	2044845	2.92947	Promoter (<=1kb)	-201	ENSG00000036448	MYOM2	protein_coding	myomesin 2
Chr2	2_166461832_166462032	166461833	166462032	2.92947	Exon	3494	ENSG00000136546	SCN7A	protein_coding	sodium voltage-gated channel alpha subunit 7
ChrX	X_52811433_52811783	52811434	52811783	2.92947	Promoter (<=1kb)	147	ENSG00000171405	XAGE5	protein_coding	X antigen family member 5
Chr11	11_44051356_44051556	44051357	44051556	2.814	3' UTR	3342	ENSG00000205126	ACCSL	protein_coding	1-aminocyclopropane-1-carboxylate synthase homolog (inactive) like
Chr2	2_110818036_110818236	110818037	110818236	2.814	Intron	12718	ENSG00000153093	ACOXL	protein_coding	acyl-CoA oxidase like
Chr15	15_73677294_73677494	73677295	73677494	2.814	Distal Intergenic	-6472	ENSG00000103855	CD276	protein_coding	CD276 molecule
Chr5	5_154868916_154869262	154868917	154869262	2.814	Promoter (1-2kb)	-1182	ENSG00000155508	CNOT8	protein_coding	CCR4-NOT transcription complex subunit 8
Chr7	7_36259049_36259359	36259050	36259359	2.814	Intron	-21724	ENSG00000122547	EEPD1	protein_coding	endonuclease/exonuclease/phosphatase family domain containing 1
Chr10	10_13768321_13768521	13768322	13768521	2.814	Intron	-6653	ENSG00000151474	FRMD4A	protein_coding	FERM domain containing 4A
ChrX	X_53024569_53024769	53024570	53024769	2.814	Distal Intergenic	-24020	ENSG00000184194	GPR173	protein_coding	G protein-coupled receptor 173
Chr5	5_80819632_80819832	80819633	80819832	2.814	Intron	6008	ENSG00000113318	MSH3	protein_coding	mutS homolog 3
Chr17	17_46631331_46631531	46631332	46631531	2.814	Intron	7041	ENSG00000073969	NSF	protein_coding	N-ethylmaleimide sensitive factor, vesicle fusing ATPase
Chr11	11_17267984_17268184	17267985	17268184	2.814	Promoter (1-2kb)	-1014	ENSG00000070081	NUCB2	protein_coding	nucleobindin 2
Chr10	10_53952325_53952540	53952326	53952540	2.814	Intron	-45109	ENSG00000150275	PCDH15	protein_coding	protocadherin related 15
Chr6	6_165932193_165932393	165932194	165932393	2.814	Intron	-7602	ENSG00000112541	PDE10A	protein_coding	phosphodiesterase 10A
Chr6	6_138123231_138123544	138123232	138123544	2.814	Distal Intergenic	-15813	ENSG00000112378	PERP	protein_coding	p53 apoptosis effector related to PMP22
Chr11	11_250843_251043	250844	251043	2.814	Promoter (<=1kb)	60	ENSG00000185627	PSMD13	protein_coding	proteasome 26S subunit, non-ATPase 13
Chr20	20_58643609_58643809	58643610	58643809	2.814	Distal Intergenic	-7463	ENSG00000124222	STX16	protein_coding	syntaxin 16
Chr12	12_108956240_108956440	108956241	108956440	2.814	Intron	-17353	ENSG00000166111	SVOP	protein_coding	SV2 related protein
Chr22	22_32823258_32823614	32823259	32823614	2.814	Intron	21554	ENSG00000100234	TIMP3	protein_coding	TIMP metallopeptidase inhibitor 3
Chr12	12_125220608_125220916	125220609	125220916	2.814	Intron	34223	ENSG00000139364	TMEM132B	protein_coding	transmembrane protein 132B
Chr7	7_144600220_144600566	144600221	144600566	2.814	Intron	45548	ENSG00000196511	TPK1	protein_coding	thiamin pyrophosphokinase 1
Chr22	22_31529834_31530495	31529835	31530495	2.76153	Promoter (1-2kb)	1015	ENSG00000198089	SFI1	protein_coding	SFI1 centrin binding protein
Chr3	3_142480667_142481090	142480668	142481090	2.74	Intron	4105	ENSG00000175054	ATR	protein_coding	ATR serine/threonine kinase
Chr15	15_43473752_43474142	43473753	43474142	2.74	Intron	-17422	ENSG00000067369	TP53BP1	protein_coding	tumor protein p53 binding protein 1
Chr12	12_101895529_101895855	101895530	101895855	2.72089	Promoter (2-3kb)	-2039	ENSG00000136048	DRAM1	protein_coding	DNA damage regulated autophagy modulator 1
Chr2	2_232925395_232925595	232925396	232925595	2.72089	Promoter (2-3kb)	2559	ENSG00000066248	NGEF	protein_coding	neuronal guanine nucleotide exchange factor
Chr17	17_3142752_3143045	3142753	3143045	2.72089	Intron	11837	ENSG00000262085	OR1P1	protein_coding	olfactory receptor family 1 subfamily P member 1 (gene/pseudogene)
Chr2	2_119117478_119117678	119117479	119117678	2.68847	Distal Intergenic	41073	ENSG00000144119	C1QL2	protein_coding	complement C1q like 2
Chr8	8_138724409_138724609	138724410	138724609	2.68847	Promoter (2-3kb)	-2217	ENSG00000169436	COL22A1	protein_coding	collagen type XXII alpha 1 chain
Chr5	5_157342965_157343353	157342966	157343353	2.68847	Promoter (2-3kb)	2211	ENSG00000172568	FNDC9	protein_coding	fibronectin type III domain containing 9
Chr7	7_152091341_152091541	152091342	152091541	2.68847	Promoter (2-3kb)	-2425	ENSG00000178234	GALNT11	protein_coding	polypeptide N-acetylgalactosaminyltransferase 11
Chr13	13_45165912_45166112	45165913	45166112	2.68847	Intron	14214	ENSG00000188342	GTF2F2	protein_coding	general transcription factor IIF subunit 2
Chr5	5_169955005_169955301	169955006	169955301	2.68847	Intron	25147	ENSG00000204767	INSYN2B	protein_coding	inhibitory synaptic factor family member 2B
Chr4	4_127676802_127677002	127676803	127677002	2.68847	Promoter (2-3kb)	2649	ENSG00000164066	INTU	protein_coding	inturned planar cell polarity protein
Chr1	1_74038400_74038605	74038401	74038605	2.68847	Intron	36185	ENSG00000162620	LRRIQ3	protein_coding	leucine rich repeats and IQ motif containing 3
Chr12	12_106386206_106386406	106386207	106386406	2.68847	Intron	4235	ENSG00000013503	POLR3B	protein_coding	RNA polymerase III subunit B
Chr7	7_155743932_155744132	155743933	155744132	2.68847	Promoter (2-3kb)	-2287	ENSG00000184863	RBM33	protein_coding	RNA binding motif protein 33
Chr7	7_75866364_75866564	75866365	75866564	2.68847	Intron	-11527	ENSG00000005486	RHBDD2	protein_coding	rhomboid domain containing 2
Chr2	2_101009775_101009979	101009776	101009979	2.68847	Intron	7037	ENSG00000071082	RPL31	protein_coding	ribosomal protein L31
Chr1	1_43771473_43771673	43771474	43771673	2.68847	Intron	-20429	ENSG00000126091	ST3GAL3	protein_coding	ST3 beta-galactoside alpha-2,3-sialyltransferase 3
Chr16	16_10804468_10804668	10804469	10804668	2.68847	Intron	13932	ENSG00000166676	TVP23A	protein_coding	trans-golgi network vesicle protein 23 homolog A
Chr1	1_55090967_55091274	55090968	55091274	2.68847	Intron	4045	ENSG00000162402	USP24	protein_coding	ubiquitin specific peptidase 24
Chr11	11_6991351_6991551	6991352	6991551	2.68847	Intron	28684	ENSG00000149050	ZNF214	protein_coding	zinc finger protein 214
Chr10	10_70653453_70653653	70653454	70653653	2.62135	Intron	-18853	ENSG00000138316	ADAMTS14	protein_coding	ADAM metallopeptidase with thrombospondin type 1 motif 14
Chr1	1_155708672_155708872	155708673	155708872	2.62135	Promoter (<=1kb)	-901	ENSG00000132676	DAP3	protein_coding	death associated protein 3
Chr9	9_92264218_92264418	92264219	92264418	2.62135	Intron	-10399	ENSG00000196305	IARS1	protein_coding	isoleucyl-tRNA synthetase 1
Chr1	1_84850549_84850749	84850550	84850749	2.62135	Intron	15395	ENSG00000171517	LPAR3	protein_coding	lysophosphatidic acid receptor 3
Chr17	17_81610532_81610732	81610533	81610732	2.62135	Promoter (1-2kb)	-1621	ENSG00000182446	NPLOC4	protein_coding	NPL4 homolog, ubiquitin recognition factor
ChrX	X_53952991_53953191	53952992	53953191	2.62135	Intron	-8428	ENSG00000172943	PHF8	protein_coding	PHD finger protein 8
Chr12	12_113106005_113106205	113106006	113106205	2.62135	Promoter (2-3kb)	-2907	ENSG00000111344	RASAL1	protein_coding	RAS protein activator like 1
Chr4	4_76547847_76548047	76547848	76548047	2.62135	Intron	-7567	ENSG00000138771	SHROOM3	protein_coding	shroom family member 3
Chr8	8_6818874_6819074	6818875	6819074	2.62135	Intron	16424	ENSG00000275591	XKR5	protein_coding	XK related 5
Chr7	7_139018296_139018510	139018297	139018510	2.62135	Distal Intergenic	17532	ENSG00000146858	ZC3HAV1L	protein_coding	zinc finger CCCH-type containing, antiviral 1 like
Chr1	1_158374479_158374752	158374480	158374752	2.57953	Distal Intergenic	18586	ENSG00000158488	CD1E	protein_coding	CD1e molecule
Chr20	20_3861285_3861485	3861286	3861485	2.57953	5' UTR	14452	ENSG00000088888	MAVS	protein_coding	mitochondrial antiviral signaling protein
Chr17	17_63731173_63731374	63731174	63731374	2.57953	Promoter (2-3kb)	-2761	ENSG00000266173	STRADA	protein_coding	STE20 related adaptor alpha
Chr12	12_57029825_57030103	57029826	57030103	2.57953	Promoter (<=1kb)	-943	ENSG00000166863	TAC3	protein_coding	tachykinin precursor 3
Chr4	4_72577955_72578155	72577956	72578155	2.55096	Distal Intergenic	-8735	ENSG00000156140	ADAMTS3	protein_coding	ADAM metallopeptidase with thrombospondin type 1 motif 3
Chr15	15_60340626_60340826	60340627	60340826	2.55096	Distal Intergenic	33679	ENSG00000182718	ANXA2	protein_coding	annexin A2
Chr3	3_133431434_133431634	133431435	133431634	2.55096	Intron	-17432	ENSG00000170819	BFSP2	protein_coding	beaded filament structural protein 2
Chr8	8_61013103_61013428	61013104	61013428	2.55096	Distal Intergenic	-43730	ENSG00000177182	CLVS1	protein_coding	clavesin 1
Chr4	4_161726341_161726541	161726342	161726541	2.55096	Intron	-61438	ENSG00000168843	FSTL5	protein_coding	follistatin like 5
Chr1	1_66272118_66272318	66272119	66272318	2.55096	Intron	14472	ENSG00000184588	PDE4B	protein_coding	phosphodiesterase 4B
Chr11	11_86109860_86110060	86109861	86110060	2.55096	Distal Intergenic	-39979	ENSG00000073921	PICALM	protein_coding	phosphatidylinositol binding clathrin assembly protein
Chr14	14_21306599_21306909	21306600	21306909	2.55096	Intron	5451	ENSG00000092200	RPGRIP1	protein_coding	RPGR interacting protein 1
Chr8	8_133017044_133017244	133017045	133017244	2.55096	Promoter (<=1kb)	-455	ENSG00000042832	TG	protein_coding	thyroglobulin
Chr5	5_110284409_110284751	110284410	110284751	2.55096	Distal Intergenic	145350	ENSG00000186952	TMEM232	protein_coding	transmembrane protein 232
Chr6	6_47286392_47286593	47286393	47286593	2.55096	Exon	23312	ENSG00000146072	TNFRSF21	protein_coding	TNF receptor superfamily member 21
Chr3	3_49317266_49317474	49317267	49317474	2.55096	Promoter (1-2kb)	1183	ENSG00000114316	USP4	protein_coding	ubiquitin specific peptidase 4
Chr15	15_100256229_100256474	100256230	100256474	2.51444	Exon	5031	ENSG00000140470	ADAMTS17	protein_coding	ADAM metallopeptidase with thrombospondin type 1 motif 17
Chr16	16_27401725_27402056	27401726	27402056	2.51444	Promoter (<=1kb)	-118	ENSG00000103522	IL21R	protein_coding	interleukin 21 receptor
ChrX	X_126784351_126784551	126784352	126784551	2.51444	Distal Intergenic	-35178	ENSG00000183631	PRR32	protein_coding	proline rich 32
Chr8	8_41306464_41306664	41306465	41306664	2.51444	Promoter (<=1kb)	326	ENSG00000104332	SFRP1	protein_coding	secreted frizzled related protein 1
Chr1	1_227245559_227245924	227245560	227245924	2.49207	Intron	8231	ENSG00000143776	CDC42BPA	protein_coding	CDC42 binding protein kinase alpha
Chr1	1_184795093_184795333	184795094	184795333	2.49207	Exon	10652	ENSG00000135842	NIBAN1	protein_coding	niban apoptosis regulator 1
Chr3	3_58617145_58617426	58617146	58617426	2.47696	Intron	9994	ENSG00000168309	FAM107A	protein_coding	family with sequence similarity 107 member A
Chr8	8_39730402_39730660	39730403	39730660	2.39896	Distal Intergenic	44042	ENSG00000104755	ADAM2	protein_coding	ADAM metallopeptidase domain 2
Chr9	9_18706752_18706952	18706753	18706952	2.39896	Promoter (<=1kb)	112	ENSG00000178031	ADAMTSL1	protein_coding	ADAMTS like 1
Chr10	10_48568590_48568790	48568591	48568790	2.39896	Intron	-11913	ENSG00000128805	ARHGAP22	protein_coding	Rho GTPase activating protein 22
Chr19	19_46912023_46912587	46912024	46912587	2.39896	Intron	-8196	ENSG00000160007	ARHGAP35	protein_coding	Rho GTPase activating protein 35
Chr13	13_24676209_24676409	24676210	24676409	2.39896	Distal Intergenic	-3999	ENSG00000075673	ATP12A	protein_coding	ATPase H+/K+ transporting non-gastric alpha2 subunit
Chr14	14_53970387_53970587	53970388	53970587	2.39896	Distal Intergenic	-11627	ENSG00000125378	BMP4	protein_coding	bone morphogenetic protein 4
Chr7	7_48042976_48043249	48042977	48043249	2.39896	Intron	7434	ENSG00000164746	C7orf57	protein_coding	chromosome 7 open reading frame 57
Chr1	1_40067568_40067768	40067569	40067768	2.39896	Promoter (<=1kb)	299	ENSG00000131236	CAP1	protein_coding	cyclase associated actin cytoskeleton regulatory protein 1
ChrX	X_51641945_51642145	51641946	51642145	2.39896	Distal Intergenic	-23034	ENSG00000224109	CENPVL3	protein_coding	centromere protein V like 3
Chr4	4_83044214_83044622	83044215	83044622	2.39896	Intron	8785	ENSG00000138663	COPS4	protein_coding	COP9 signalosome subunit 4
Chr1	1_167569000_167569200	167569001	167569200	2.39896	Distal Intergenic	-15196	ENSG00000143162	CREG1	protein_coding	cellular repressor of E1A stimulated genes 1
Chr9	9_87478444_87478644	87478445	87478644	2.39896	Distal Intergenic	-18584	ENSG00000196730	DAPK1	protein_coding	death associated protein kinase 1
Chr18	18_52869942_52870267	52869943	52870267	2.39896	Intron	-53517	ENSG00000187323	DCC	protein_coding	DCC netrin 1 receptor
Chr10	10_11729671_11729871	11729672	11729871	2.39896	Distal Intergenic	-12495	ENSG00000134463	ECHDC3	protein_coding	enoyl-CoA hydratase domain containing 3
Chr12	12_13179935_13180135	13179936	13180135	2.39896	Distal Intergenic	-16588	ENSG00000134531	EMP1	protein_coding	epithelial membrane protein 1
Chr3	3_138457386_138457586	138457387	138457586	2.39896	Exon	-11657	ENSG00000158220	ESYT3	protein_coding	extended synaptotagmin 3
Chr3	3_16203836_16204036	16203837	16204036	2.39896	Intron	-8662	ENSG00000131386	GALNT15	protein_coding	polypeptide N-acetylgalactosaminyltransferase 15
Chr12	12_112359107_112359307	112359108	112359307	2.39896	Intron	22785	ENSG00000173064	HECTD4	protein_coding	HECT domain E3 ubiquitin protein ligase 4
Chr3	3_20127750_20127950	20127751	20127950	2.39896	Promoter (<=1kb)	273	ENSG00000114166	KAT2B	protein_coding	lysine acetyltransferase 2B
Chr11	11_78177832_78178081	78177833	78178081	2.39896	Promoter (1-2kb)	-1531	ENSG00000188997	KCTD21	protein_coding	potassium channel tetramerization domain containing 21
Chr12	12_121478353_121478595	121478354	121478595	2.39896	Intron	-7801	ENSG00000089094	KDM2B	protein_coding	lysine demethylase 2B
Chr5	5_132730545_132730745	132730546	132730745	2.39896	Intron	6183	ENSG00000131437	KIF3A	protein_coding	kinesin family member 3A
Chr7	7_152345041_152345241	152345042	152345241	2.39896	Intron	-14303	ENSG00000055609	KMT2C	protein_coding	lysine methyltransferase 2C
Chr6	6_90674844_90675044	90674845	90675044	2.39896	Distal Intergenic	-87759	ENSG00000135341	MAP3K7	protein_coding	mitogen-activated protein kinase kinase kinase 7
Chr1	1_54679872_54680072	54679873	54680072	2.39896	3' UTR	-6193	ENSG00000184313	MROH7	protein_coding	maestro heat like repeat family member 7
Chr4	4_77849020_77849220	77849021	77849220	2.39896	Distal Intergenic	-13610	ENSG00000169288	MRPL1	protein_coding	mitochondrial ribosomal protein L1
Chr20	20_50721963_50722270	50721964	50722270	2.39896	Distal Intergenic	-9310	ENSG00000124171	PARD6B	protein_coding	par-6 family cell polarity regulator beta
Chr1	1_62122360_62122595	62122361	62122595	2.39896	Promoter (1-2kb)	1487	ENSG00000132849	PATJ	protein_coding	PATJ crumbs cell polarity complex component
Chr12	12_53471408_53471608	53471409	53471608	2.39896	Promoter (2-3kb)	2941	ENSG00000197111	PCBP2	protein_coding	poly(rC) binding protein 2
Chr1	1_182650071_182650271	182650072	182650271	2.39896	Intron	21582	ENSG00000135824	RGS8	protein_coding	regulator of G protein signaling 8
Chr12	12_59744673_59744909	59744674	59744909	2.39896	Intron	-24150	ENSG00000118596	SLC16A7	protein_coding	solute carrier family 16 member 7
Chr14	14_36731955_36732155	36731956	36732155	2.39896	Intron	-6277	ENSG00000183032	SLC25A21	protein_coding	solute carrier family 25 member 21
Chr7	7_2327507_2327707	2327508	2327707	2.39896	Intron	-13067	ENSG00000106266	SNX8	protein_coding	sorting nexin 8
Chr1	1_155868334_155868534	155868335	155868534	2.39896	Exon	8768	ENSG00000132718	SYT11	protein_coding	synaptotagmin 11
Chr5	5_77640377_77640621	77640378	77640621	2.3165	Promoter (1-2kb)	-1665	ENSG00000171540	OTP	protein_coding	orthopedia homeobox
Chr1	1_223401152_223401482	223401153	223401482	2.29942	Distal Intergenic	7738	ENSG00000178395	CCDC185	protein_coding	coiled-coil domain containing 185
Chr15	15_51483564_51483969	51483565	51483969	2.29942	Intron	-12215	ENSG00000104093	DMXL2	protein_coding	Dmx like 2
Chr5	5_6466392_6466592	6466393	6466592	2.29942	Intron	17534	ENSG00000215218	UBE2QL1	protein_coding	ubiquitin conjugating enzyme E2 QL1
Chr6	6_167897621_167897949	167897622	167897949	2.27343	Intron	3942	ENSG00000130396	AFDN	protein_coding	afadin, adherens junction formation factor
Chr3	3_32940843_32941043	32940844	32941043	2.27343	Distal Intergenic	-10601	ENSG00000183813	CCR4	protein_coding	C-C motif chemokine receptor 4
Chr8	8_1500321_1500521	1500322	1500521	2.27343	Promoter (<=1kb)	-845	ENSG00000198010	DLGAP2	protein_coding	DLG associated protein 2
Chr13	13_49761634_49761911	49761635	49761911	2.27343	Intron	30771	ENSG00000102753	KPNA3	protein_coding	karyopherin subunit alpha 3
Chr13	13_35014587_35015084	35014588	35015084	2.27343	Intron	-29558	ENSG00000172915	NBEA	protein_coding	neurobeachin
Chr4	4_39829724_39830012	39829725	39830012	2.27343	Intron	18549	ENSG00000121892	PDS5A	protein_coding	PDS5 cohesin associated factor A
Chr14	14_63529314_63529514	63529315	63529514	2.27343	Intron	13784	ENSG00000154001	PPP2R5E	protein_coding	protein phosphatase 2 regulatory subunit B'epsilon
ChrX	X_24258469_24258669	24258470	24258669	2.27343	Distal Intergenic	55400	ENSG00000223611	SUPT20HL2	protein_coding	SUPT20H like 2
Chr10	10_80186515_80186715	80186516	80186715	2.22903	Intron	-13495	ENSG00000122359	ANXA11	protein_coding	annexin A11
Chr10	10_118740602_118740802	118740603	118740802	2.22903	Intron	13675	ENSG00000151893	CACUL1	protein_coding	CDK2 associated cullin domain 1
Chr11	11_27305823_27306023	27305824	27306023	2.22903	Distal Intergenic	44401	ENSG00000109881	CCDC34	protein_coding	coiled-coil domain containing 34
Chr14	14_54282341_54282541	54282342	54282541	2.22903	Distal Intergenic	-114308	ENSG00000100526	CDKN3	protein_coding	cyclin dependent kinase inhibitor 3
Chr7	7_107242637_107242837	107242638	107242837	2.22903	Intron	10410	ENSG00000164597	COG5	protein_coding	component of oligomeric golgi complex 5
Chr10	10_122551496_122551696	122551497	122551696	2.22903	Distal Intergenic	-8969	ENSG00000187908	DMBT1	protein_coding	deleted in malignant brain tumors 1
ChrX	X_57266769_57267049	57266770	57267049	2.22903	Distal Intergenic	-19657	ENSG00000165591	FAAH2	protein_coding	fatty acid amide hydrolase 2
Chr9	9_83459380_83459580	83459381	83459580	2.22903	Intron	8162	ENSG00000172159	FRMD3	protein_coding	FERM domain containing 3
Chr2	2_30931771_30932011	30931772	30932011	2.22903	Intron	-6949	ENSG00000158089	GALNT14	protein_coding	polypeptide N-acetylgalactosaminyltransferase 14
Chr5	5_148654208_148654408	148654209	148654408	2.22903	Promoter (<=1kb)	-56	ENSG00000164270	HTR4	protein_coding	5-hydroxytryptamine receptor 4
Chr16	16_68113727_68113927	68113728	68113927	2.22903	Intron	-9103	ENSG00000072736	NFATC3	protein_coding	nuclear factor of activated T cells 3
Chr16	16_68338427_68338787	68338428	68338787	2.22903	Intron	-7334	ENSG00000132600	PRMT7	protein_coding	protein arginine methyltransferase 7
Chr12	12_80454278_80454478	80454279	80454478	2.22903	Intron	10044	ENSG00000139304	PTPRQ	protein_coding	protein tyrosine phosphatase receptor type Q
Chr5	5_168478891_168479091	168478892	168479091	2.22903	Distal Intergenic	-7360	ENSG00000113643	RARS1	protein_coding	arginyl-tRNA synthetase 1
Chr14	14_54808163_54808363	54808164	54808363	2.22903	Distal Intergenic	23898	ENSG00000020577	SAMD4A	protein_coding	sterile alpha motif domain containing 4A
Chr5	5_70037417_70037617	70037418	70037617	2.22903	Intron	11154	ENSG00000205572	SERF1B	protein_coding	small EDRK-rich factor 1B
ChrX	X_106012660_106012860	106012661	106012860	2.22903	Distal Intergenic	22420	ENSG00000123561	SERPINA7	protein_coding	serpin family A member 7
Chr5	5_54527359_54527559	54527360	54527559	2.22903	Intron	9495	ENSG00000178996	SNX18	protein_coding	sorting nexin 18
Chr14	14_64150421_64150621	64150422	64150621	2.22903	Intron	-8086	ENSG00000054654	SYNE2	protein_coding	spectrin repeat containing nuclear envelope protein 2
Chr14	14_21846980_21847220	21846981	21847220	2.22903	Promoter (<=1kb)	444	ENSG00000211786	TRAV8-2	TR_V_gene	T cell receptor alpha variable 8-2
Chr3	3_102262864_102263096	102262865	102263096	2.22903	Intron	87182	ENSG00000170044	ZPLD1	protein_coding	zona pellucida like domain containing 1
Chr11	11_120224826_120225090	120224827	120225090	2.20631	Intron	11091	ENSG00000184232	OAF	protein_coding	out at first homolog
Chr11	11_57237562_57237762	57237563	57237762	2.19251	Promoter (<=1kb)	-313	ENSG00000134817	APLNR	protein_coding	apelin receptor
Chr9	9_34709088_34709327	34709089	34709327	2.19251	Promoter (<=1kb)	742	ENSG00000137077	CCL21	protein_coding	C-C motif chemokine ligand 21
Chr22	22_17542978_17543317	17542979	17543317	2.19251	Exon	-5682	ENSG00000099954	CECR2	protein_coding	CECR2 histone acetyl-lysine reader
ChrX	X_135245470_135245761	135245471	135245761	2.19251	Distal Intergenic	-6300	ENSG00000238210	ETDA	protein_coding	embryonic testis differentiation homolog A
Chr1	1_28496000_28496200	28496001	28496200	2.19251	Intron	4306	ENSG00000204138	PHACTR4	protein_coding	phosphatase and actin regulator 4
Chr2	2_131210297_131210497	131210298	131210497	2.19251	Promoter (<=1kb)	762	ENSG00000188219	POTEE	protein_coding	POTE ankyrin domain family member E
Chr12	12_123500072_123500272	123500073	123500272	2.19251	Intron	14156	ENSG00000188026	RILPL1	protein_coding	Rab interacting lysosomal protein like 1
Chr7	7_96780104_96780472	96780105	96780472	2.19251	Distal Intergenic	-70225	ENSG00000127922	SEM1	protein_coding	SEM1 26S proteasome subunit
Chr3	3_41953832_41954032	41953833	41954032	2.19251	Promoter (<=1kb)	766	ENSG00000168038	ULK4	protein_coding	unc-51 like kinase 4
Chr1	1_243581202_243581402	243581203	243581402	2.13593	Intron	-15525	ENSG00000117020	AKT3	protein_coding	AKT serine/threonine kinase 3
Chr11	11_94681698_94681898	94681699	94681898	2.13593	Intron	-24533	ENSG00000166025	AMOTL1	protein_coding	angiomotin like 1
Chr6	6_34916194_34916394	34916195	34916394	2.13593	Intron	26881	ENSG00000064999	ANKS1A	protein_coding	ankyrin repeat and sterile alpha motif domain containing 1A
Chr11	11_108277051_108277251	108277052	108277251	2.13593	Intron	-5536	ENSG00000149311	ATM	protein_coding	ATM serine/threonine kinase
Chr5	5_181036946_181037146	181036947	181037146	2.13593	Distal Intergenic	-3079	ENSG00000165810	BTNL9	protein_coding	butyrophilin like 9
Chr11	11_34081736_34081936	34081737	34081936	2.13593	Intron	-8090	ENSG00000135387	CAPRIN1	protein_coding	cell cycle associated protein 1
Chr22	22_28689891_28690218	28689892	28690218	2.13593	Promoter (<=1kb)	-482	ENSG00000183765	CHEK2	protein_coding	checkpoint kinase 2
Chr7	7_28804244_28804444	28804245	28804444	2.13593	Exon	-4965	ENSG00000146592	CREB5	protein_coding	cAMP responsive element binding protein 5
Chr7	7_101801762_101801962	101801763	101801962	2.13593	Distal Intergenic	-13942	ENSG00000257923	CUX1	protein_coding	cut like homeobox 1
Chr9	9_22406464_22406664	22406465	22406664	2.13593	Distal Intergenic	-40160	ENSG00000176399	DMRTA1	protein_coding	DMRT like family A1
Chr10	10_75072680_75072880	75072681	75072880	2.13593	Promoter (<=1kb)	762	ENSG00000188716	DUSP29	protein_coding	dual specificity phosphatase 29
Chr6	6_138856188_138856388	138856189	138856388	2.13593	Intron	6811	ENSG00000203734	ECT2L	protein_coding	epithelial cell transforming 2 like
Chr8	8_58074280_58074480	58074281	58074480	2.13593	Intron	3963	ENSG00000169122	FAM110B	protein_coding	family with sequence similarity 110 member B
ChrX	X_48491608_48491808	48491609	48491808	2.13593	Distal Intergenic	9977	ENSG00000068438	FTSJ1	protein_coding	FtsJ RNA 2'-O-methyltransferase 1
Chr6	6_111732764_111732964	111732765	111732964	2.13593	Intron	-18273	ENSG00000010810	FYN	protein_coding	FYN proto-oncogene, Src family tyrosine kinase
Chr6	6_26149736_26149936	26149737	26149936	2.13593	Intron	-6393	ENSG00000168298	H1-4	protein_coding	H1.4 linker histone, cluster member
Chr5	5_132675829_132676229	132675830	132676229	2.13593	Promoter (1-2kb)	1472	ENSG00000113520	IL4	protein_coding	interleukin 4
ChrX	X_136256884_136257145	136256885	136257145	2.13593	Promoter (<=1kb)	-403	ENSG00000129680	MAP7D3	protein_coding	MAP7 domain containing 3
Chr19	19_8640451_8640651	8640452	8640651	2.13593	Intron	9781	ENSG00000268480	NFILZ	protein_coding	NFIL3 like basic leucine zipper
Chr1	1_226390693_226390893	226390694	226390893	2.13593	Promoter (1-2kb)	1899	ENSG00000143799	PARP1	protein_coding	poly(ADP-ribose) polymerase 1
Chr8	8_22952939_22953139	22952940	22953139	2.13593	Intron	-11604	ENSG00000134020	PEBP4	protein_coding	phosphatidylethanolamine binding protein 4
Chr22	22_24780543_24780743	24780544	24780743	2.13593	Distal Intergenic	-5824	ENSG00000184571	PIWIL3	protein_coding	piwi like RNA-mediated gene silencing 3
Chr2	2_160024683_160024883	160024684	160024883	2.13593	Intron	37727	ENSG00000153246	PLA2R1	protein_coding	phospholipase A2 receptor 1
Chr1	1_171589310_171589510	171589311	171589510	2.13593	Promoter (1-2kb)	1649	ENSG00000117523	PRRC2C	protein_coding	proline rich coiled-coil 2C
Chr9	9_82925345_82925545	82925346	82925545	2.13593	Distal Intergenic	137597	ENSG00000165105	RASEF	protein_coding	RAS and EF-hand domain containing
Chr10	10_110829736_110829936	110829737	110829936	2.13593	Promoter (1-2kb)	1966	ENSG00000203867	RBM20	protein_coding	RNA binding motif protein 20
Chr6	6_110430156_110430356	110430157	110430356	2.13593	Intron	-4775	ENSG00000004809	SLC22A16	protein_coding	solute carrier family 22 member 16
Chr10	10_97081812_97082012	97081813	97082012	2.13593	Intron	20544	ENSG00000187122	SLIT1	protein_coding	slit guidance ligand 1
Chr7	7_88330130_88330611	88330131	88330611	2.13593	Distal Intergenic	-23237	ENSG00000127954	STEAP4	protein_coding	STEAP4 metalloreductase
Chr7	7_139270873_139271073	139270874	139271073	2.13593	Intron	12355	ENSG00000157741	UBN2	protein_coding	ubinuclein 2
Chr1	1_155673867_155674067	155673868	155674067	2.13593	Promoter (<=1kb)	984	ENSG00000163374	YY1AP1	protein_coding	YY1 associated protein 1
Chr1	1_52299805_52300005	52299806	52300005	2.13593	Intron	3911	ENSG00000157077	ZFYVE9	protein_coding	zinc finger FYVE-type containing 9
Chr1	1_119631536_119631736	119631537	119631736	2.13593	Intron	16530	ENSG00000143067	ZNF697	protein_coding	zinc finger protein 697
Chr6	6_117829724_117830149	117829725	117830149	2.1035	Distal Intergenic	-77115	ENSG00000196376	SLC35F1	protein_coding	solute carrier family 35 member F1
Chr1	1_15813848_15814259	15813849	15814259	2.1035	Distal Intergenic	-4501	ENSG00000233954	UQCRHL	protein_coding	ubiquinol-cytochrome c reductase hinge protein like
Chr16	16_67054844_67055044	67054845	67055044	2.07703	Intron	18418	ENSG00000067955	CBFB	protein_coding	core-binding factor subunit beta
Chr10	10_71450050_71450250	71450051	71450250	2.07703	Intron	10219	ENSG00000107736	CDH23	protein_coding	cadherin related 23
Chr2	2_36408293_36408493	36408294	36408493	2.07703	Intron	29937	ENSG00000150938	CRIM1	protein_coding	cysteine rich transmembrane BMP regulator 1
Chr3	3_37941589_37941842	37941590	37941842	2.07703	Promoter (2-3kb)	-2872	ENSG00000144677	CTDSPL	protein_coding	CTD small phosphatase like
Chr21	21_41304443_41304655	41304444	41304655	2.07703	Promoter (<=1kb)	194	ENSG00000183844	FAM3B	protein_coding	FAM3 metabolism regulating signaling molecule B
Chr2	2_186637292_186637545	186637293	186637545	2.07703	Intron	7528	ENSG00000138448	ITGAV	protein_coding	integrin subunit alpha V
Chr6	6_155428764_155428964	155428765	155428964	2.07703	Exon	26875	ENSG00000074771	NOX3	protein_coding	NADPH oxidase 3
Chr3	3_28903085_28903285	28903086	28903285	2.07703	Intron	37862	ENSG00000144642	RBMS3	protein_coding	RNA binding motif single stranded interacting protein 3
Chr6	6_110974596_110974796	110974597	110974796	2.07703	Distal Intergenic	-7219	ENSG00000197498	RPF2	protein_coding	ribosome production factor 2 homolog
Chr3	3_8655324_8655524	8655325	8655524	2.07703	Intron	-3251	ENSG00000125046	SSUH2	protein_coding	ssu-2 homolog
Chr2	2_238366812_238367013	238366813	238367013	2.07703	Intron	19630	ENSG00000204104	TRAF3IP1	protein_coding	TRAF3 interacting protein 1
Chr7	7_117323809_117324086	117323810	117324086	2.07703	Promoter (<=1kb)	-658	ENSG00000105989	WNT2	protein_coding	Wnt family member 2
Chr17	17_68001776_68001976	68001777	68001976	2.03639	Distal Intergenic	-5308	ENSG00000186665	C17orf58	protein_coding	chromosome 17 open reading frame 58
Chr19	19_29819146_29819346	29819147	29819346	2.03639	Promoter (1-2kb)	1944	ENSG00000105173	CCNE1	protein_coding	cyclin E1
Chr7	7_2438058_2438291	2438059	2438291	2.03639	Promoter (<=1kb)	296	ENSG00000136213	CHST12	protein_coding	carbohydrate sulfotransferase 12
Chr2	2_127188154_127188354	127188155	127188354	2.03639	Intron	17413	ENSG00000186684	CYP27C1	protein_coding	cytochrome P450 family 27 subfamily C member 1
Chr14	14_72731922_72732122	72731923	72732122	2.03639	Promoter (<=1kb)	-256	ENSG00000205683	DPF3	protein_coding	double PHD fingers 3
Chr2	2_211888802_211889002	211888803	211889002	2.03639	Intron	71760	ENSG00000178568	ERBB4	protein_coding	erb-b2 receptor tyrosine kinase 4
Chr9	9_41124297_41124644	41124298	41124644	2.03639	Intron	4037	ENSG00000273514	FOXD4L6	protein_coding	forkhead box D4 like 6
Chr12	12_128846816_128847016	128846817	128847016	2.03639	Distal Intergenic	-6411	ENSG00000151948	GLT1D1	protein_coding	glycosyltransferase 1 domain containing 1
Chr7	7_50604386_50604586	50604387	50604586	2.03639	Promoter (1-2kb)	1827	ENSG00000106070	GRB10	protein_coding	growth factor receptor bound protein 10
Chr14	14_21260265_21260465	21260266	21260465	2.03639	Promoter (2-3kb)	2212	ENSG00000092199	HNRNPC	protein_coding	heterogeneous nuclear ribonucleoprotein C
Chr4	4_3040798_3041002	3040799	3041002	2.03639	Promoter (<=1kb)	-361	ENSG00000197386	HTT	protein_coding	huntingtin
Chr1	1_152630446_152630646	152630447	152630646	2.03639	Distal Intergenic	-7344	ENSG00000185962	LCE3A	protein_coding	late cornified envelope 3A
Chr15	15_41702127_41702327	41702128	41702327	2.03639	Intron	5243	ENSG00000174197	MGA	protein_coding	MAX dimerization protein MGA
Chr12	12_16382900_16383100	16382901	16383100	2.03639	Promoter (<=1kb)	74	ENSG00000008394	MGST1	protein_coding	microsomal glutathione S-transferase 1
Chr15	15_65036588_65036788	65036589	65036788	2.03639	Distal Intergenic	-6950	ENSG00000103707	MTFMT	protein_coding	mitochondrial methionyl-tRNA formyltransferase
Chr2	2_96460990_96461190	96460991	96461190	2.03639	Distal Intergenic	44155	ENSG00000163121	NEURL3	protein_coding	neuralized E3 ubiquitin protein ligase 3
Chr2	2_168839535_168839735	168839536	168839735	2.03639	Intron	-3317	ENSG00000163072	NOSTRIN	protein_coding	nitric oxide synthase trafficking
Chr2	2_156369038_156369393	156369039	156369393	2.03639	Distal Intergenic	-26691	ENSG00000153234	NR4A2	protein_coding	nuclear receptor subfamily 4 group A member 2
Chr2	2_1695640_1695851	1695641	1695851	2.03639	Intron	-3071	ENSG00000130508	PXDN	protein_coding	peroxidasin
Chr7	7_22242380_22242664	22242381	22242664	2.03639	Intron	-22143	ENSG00000136237	RAPGEF5	protein_coding	Rap guanine nucleotide exchange factor 5
Chr14	14_102711336_102711536	102711337	102711536	2.03639	Promoter (<=1kb)	595	ENSG00000089902	RCOR1	protein_coding	REST corepressor 1
Chr2	2_11177188_11177388	11177189	11177388	2.03639	Intron	5177	ENSG00000162976	SLC66A3	protein_coding	solute carrier family 66 member 3
Chr17	17_58590029_58590229	58590030	58590229	2.03639	Intron	-16779	ENSG00000121101	TEX14	protein_coding	testis expressed 14, intercellular bridge forming factor
Chr1	1_61714497_61714697	61714498	61714697	2.03639	Intron	-5080	ENSG00000162604	TM2D1	protein_coding	TM2 domain containing 1
Chr13	13_51844737_51844937	51844738	51844937	2.03639	Promoter (<=1kb)	213	ENSG00000281106	TMEM272	protein_coding	transmembrane protein 272
Chr9	9_37296473_37296673	37296474	37296673	2.03639	Intron	12311	ENSG00000147905	ZCCHC7	protein_coding	zinc finger CCHC-type containing 7
Chr19	19_9945568_9945902	9945569	9945902	2.01563	Distal Intergenic	-9054	ENSG00000105088	OLFM2	protein_coding	olfactomedin 2
Chr7	7_2775836_2776180	2775837	2776180	2.00664	Intron	11229	ENSG00000174945	AMZ1	protein_coding	archaelysin family metallopeptidase 1
Chr4	4_5798845_5799116	5798846	5799116	2.00664	Intron	5238	ENSG00000072840	EVC	protein_coding	EvC ciliary complex subunit 1
Chr6	6_13772512_13772712	13772513	13772712	2.00664	Distal Intergenic	28633	ENSG00000050393	MCUR1	protein_coding	mitochondrial calcium uniporter regulator 1
Chr2	2_130892655_130892954	130892656	130892954	1.98392	Intron	-23697	ENSG00000136002	ARHGEF4	protein_coding	Rho guanine nucleotide exchange factor 4
ChrX	X_64225190_64225390	64225191	64225390	1.98392	Exon	5217	ENSG00000198881	ASB12	protein_coding	ankyrin repeat and SOCS box containing 12
Chr2	2_224604000_224604200	224604001	224604200	1.98392	Distal Intergenic	-18604	ENSG00000036257	CUL3	protein_coding	cullin 3
Chr1	1_53476422_53476846	53476423	53476846	1.98392	Distal Intergenic	16447	ENSG00000143006	DMRTB1	protein_coding	DMRT like family B with proline rich C-terminal 1
Chr14	14_88775566_88775766	88775567	88775766	1.98392	Intron	16737	ENSG00000165521	EML5	protein_coding	EMAP like 5
Chr12	12_48930993_48931193	48930994	48931193	1.98392	Intron	-4520	ENSG00000134285	FKBP11	protein_coding	FKBP prolyl isomerase 11
Chr10	10_130168538_130168738	130168539	130168738	1.98392	Intron	8793	ENSG00000108010	GLRX3	protein_coding	glutaredoxin 3
Chr12	12_49032161_49032485	49032162	49032485	1.98392	Promoter (<=1kb)	-758	ENSG00000167548	KMT2D	protein_coding	lysine methyltransferase 2D
Chr7	7_149672191_149672391	149672192	149672391	1.98392	Distal Intergenic	-42390	ENSG00000133619	KRBA1	protein_coding	KRAB-A domain containing 1
ChrX	X_115289779_115289979	115289780	115289979	1.98392	Promoter (<=1kb)	53	ENSG00000102021	LUZP4	protein_coding	leucine zipper protein 4
Chr6	6_124725814_124726047	124725815	124726047	1.98392	Intron	-92352	ENSG00000188580	NKAIN2	protein_coding	sodium/potassium transporting ATPase interacting 2
Chr1	1_182807772_182807972	182807773	182807972	1.98392	Intron	-10666	ENSG00000135838	NPL	protein_coding	N-acetylneuraminate pyruvate lyase
ChrX	X_134669688_134669888	134669689	134669888	1.98392	Intron	-11218	ENSG00000170965	PLAC1	protein_coding	placenta enriched 1
Chr18	18_48002949_48003176	48002950	48003176	1.98392	Distal Intergenic	-71804	ENSG00000175387	SMAD2	protein_coding	SMAD family member 2
Chr16	16_10665269_10665576	10665270	10665576	1.98392	Intron	6202	ENSG00000153060	TEKT5	protein_coding	tektin 5
Chr4	4_153535019_153535219	153535020	153535219	1.98392	Intron	-18962	ENSG00000121210	TMEM131L	protein_coding	transmembrane 131 like
Chr6	6_158529736_158529936	158529737	158529936	1.98392	Distal Intergenic	-6500	ENSG00000146433	TMEM181	protein_coding	transmembrane protein 181
Chr15	15_73394040_73394378	73394041	73394378	1.966	Distal Intergenic	-25083	ENSG00000138622	HCN4	protein_coding	hyperpolarization activated cyclic nucleotide gated potassium channel 4
Chr19	19_47089465_47089867	47089466	47089867	1.966	Intron	-4111	ENSG00000130749	ZC3H4	protein_coding	zinc finger CCCH-type containing 4
Chr2	2_152031496_152031696	152031497	152031696	1.9515	Intron	17093	ENSG00000182389	CACNB4	protein_coding	calcium voltage-gated channel auxiliary subunit beta 4
Chr9	9_75042260_75042462	75042261	75042462	1.9515	Distal Intergenic	-13838	ENSG00000156017	CARNMT1	protein_coding	carnosine N-methyltransferase 1
Chr1	1_201512126_201512375	201512127	201512375	1.9515	Promoter (2-3kb)	-2671	ENSG00000159176	CSRP1	protein_coding	cysteine and glycine rich protein 1
Chr1	1_224946183_224946447	224946184	224946447	1.9515	Intron	-6223	ENSG00000185842	DNAH14	protein_coding	dynein axonemal heavy chain 14
Chr11	11_113952331_113952531	113952332	113952531	1.9515	Distal Intergenic	20947	ENSG00000149305	HTR3B	protein_coding	5-hydroxytryptamine receptor 3B
Chr6	6_10830201_10830401	10830202	10830401	1.9515	Intron	8079	ENSG00000111837	MAK	protein_coding	male germ cell associated kinase
Chr14	14_102297658_102297858	102297659	102297858	1.9515	Intron	7276	ENSG00000080823	MOK	protein_coding	MOK protein kinase
Chr3	3_72984237_72984471	72984238	72984471	1.9515	Intron	-12332	ENSG00000163605	PPP4R2	protein_coding	protein phosphatase 4 regulatory subunit 2
Chr14	14_73209050_73209277	73209051	73209277	1.9515	Promoter (2-3kb)	2898	ENSG00000080815	PSEN1	protein_coding	presenilin 1
Chr8	8_91948821_91949021	91948822	91949021	1.9515	Distal Intergenic	22139	ENSG00000079102	RUNX1T1	protein_coding	RUNX1 partner transcriptional co-repressor 1
Chr1	1_156176621_156176821	156176622	156176821	1.9515	Promoter (1-2kb)	1289	ENSG00000196189	SEMA4A	protein_coding	semaphorin 4A
Chr4	4_107788400_107788842	107788401	107788842	1.9515	Distal Intergenic	-35721	ENSG00000164023	SGMS2	protein_coding	sphingomyelin synthase 2
Chr16	16_12132952_12133152	12132953	12133152	1.9515	Intron	3256	ENSG00000048471	SNX29	protein_coding	sorting nexin 29
Chr1	1_217696005_217696205	217696006	217696205	1.9515	Intron	-41639	ENSG00000162814	SPATA17	protein_coding	spermatogenesis associated 17
Chr6	6_121153592_121153860	121153593	121153860	1.9515	Intron	6177	ENSG00000146350	TBC1D32	protein_coding	TBC1 domain family member 32
Chr1	1_156306535_156306984	156306536	156306984	1.9515	Downstream (1-2kb)	-7229	ENSG00000189030	VHLL	protein_coding	VHL like
Chr12	12_108240218_108240610	108240219	108240610	1.9515	Exon	13229	ENSG00000075035	WSCD2	protein_coding	WSC domain containing 2
Chr22	22_39913007_39913306	39913008	39913306	1.92947	Intron	11924	ENSG00000100351	GRAP2	protein_coding	GRB2 related adaptor protein 2
Chr1	1_110630810_110631065	110630811	110631065	1.92947	Promoter (<=1kb)	409	ENSG00000177301	KCNA2	protein_coding	potassium voltage-gated channel subfamily A member 2
ChrX	X_46446678_46446878	46446679	46446878	1.92947	Promoter (<=1kb)	-414	ENSG00000147121	KRBOX4	protein_coding	KRAB box domain containing 4
Chr15	15_88920731_88920931	88920732	88920931	1.92947	Distal Intergenic	-7264	ENSG00000140545	MFGE8	protein_coding	milk fat globule EGF and factor V/VIII domain containing
Chr1	1_149980649_149980849	149980650	149980849	1.92947	Intron	-9389	ENSG00000264522	OTUD7B	protein_coding	OTU deubiquitinase 7B
Chr20	20_44326956_44327325	44326957	44327325	1.92947	Distal Intergenic	-9718	ENSG00000101074	R3HDML	protein_coding	R3H domain containing like
Chr12	12_56559811_56560011	56559812	56560011	1.92947	Intron	-11687	ENSG00000076067	RBMS2	protein_coding	RNA binding motif single stranded interacting protein 2
Chr20	20_4896997_4897197	4896998	4897197	1.92947	Promoter (2-3kb)	2450	ENSG00000089057	SLC23A2	protein_coding	solute carrier family 23 member 2
Chr1	1_182057081_182057281	182057082	182057281	1.92947	Promoter (<=1kb)	729	ENSG00000179930	ZNF648	protein_coding	zinc finger protein 648
Chr17	17_47958163_47958363	47958164	47958363	1.91353	Promoter (<=1kb)	-281	ENSG00000167183	PRR15L	protein_coding	proline rich 15 like
Chr17	17_50992572_50992851	50992573	50992851	1.91353	Promoter (1-2kb)	1086	ENSG00000008294	SPAG9	protein_coding	sperm associated antigen 9
Chr22	22_21601913_21602147	21601914	21602147	1.91353	Intron	27865	ENSG00000161179	YDJC	protein_coding	YdjC chitooligosaccharide deacetylase homolog
Chr17	17_39962605_39962805	39962606	39962805	1.90146	Promoter (<=1kb)	-199	ENSG00000167914	GSDMA	protein_coding	gasdermin A
Chr13	13_61323827_61324185	61323828	61324185	1.90146	Distal Intergenic	91664	ENSG00000280165	PCDH20	protein_coding	protocadherin 20
Chr1	1_25743968_25744279	25743969	25744279	1.892	Intron	-27790	ENSG00000117643	MAN1C1	protein_coding	mannosidase alpha class 1C member 1
ChrX	X_135170881_135171261	135170882	135171261	1.86845	Promoter (<=1kb)	137	ENSG00000169551	CT55	protein_coding	cancer/testis antigen 55
Chr3	3_64536021_64536221	64536022	64536221	1.814	Promoter (2-3kb)	2996	ENSG00000163638	ADAMTS9	protein_coding	ADAM metallopeptidase with thrombospondin type 1 motif 9
Chr6	6_161243317_161243769	161243318	161243769	1.814	Intron	-11082	ENSG00000026652	AGPAT4	protein_coding	1-acylglycerol-3-phosphate O-acyltransferase 4
Chr5	5_35003094_35003385	35003095	35003385	1.814	Intron	22448	ENSG00000113492	AGXT2	protein_coding	alanine--glyoxylate aminotransferase 2
Chr17	17_19670786_19670986	19670787	19670986	1.814	Promoter (<=1kb)	-782	ENSG00000072210	ALDH3A2	protein_coding	aldehyde dehydrogenase 3 family member A2
Chr2	2_288391_288591	288392	288591	1.814	Promoter (<=1kb)	260	ENSG00000189292	ALKAL2	protein_coding	ALK and LTK ligand 2
Chr1	1_17519998_17520301	17519999	17520301	1.814	Distal Intergenic	-19397	ENSG00000074964	ARHGEF10L	protein_coding	Rho guanine nucleotide exchange factor 10 like
Chr2	2_25744042_25744242	25744043	25744242	1.814	Exon	5685	ENSG00000143970	ASXL2	protein_coding	ASXL transcriptional regulator 2
Chr3	3_10546457_10546657	10546458	10546657	1.814	Intron	-12325	ENSG00000157087	ATP2B2	protein_coding	ATPase plasma membrane Ca2+ transporting 2
Chr15	15_90795437_90795637	90795438	90795637	1.814	Promoter (1-2kb)	1637	ENSG00000197299	BLM	protein_coding	BLM RecQ like helicase
Chr2	2_196818110_196818310	196818111	196818310	1.814	Distal Intergenic	-8756	ENSG00000187944	C2orf66	protein_coding	chromosome 2 open reading frame 66
Chr20	20_33474819_33475019	33474820	33475019	1.814	Distal Intergenic	-15056	ENSG00000078699	CBFA2T2	protein_coding	CBFA2/RUNX1 partner transcriptional co-repressor 2
Chr3	3_111561639_111561839	111561640	111561839	1.814	Intron	-5742	ENSG00000153283	CD96	protein_coding	CD96 molecule
Chr1	1_196897282_196897482	196897283	196897482	1.814	Promoter (<=1kb)	-198	ENSG00000134365	CFHR4	protein_coding	complement factor H related 4
Chr16	16_58571910_58572110	58571911	58572110	1.814	Promoter (2-3kb)	2953	ENSG00000125107	CNOT1	protein_coding	CCR4-NOT transcription complex subunit 1
Chr3	3_15516350_15516550	15516351	15516550	1.814	Intron	5156	ENSG00000206561	COLQ	protein_coding	collagen like tail subunit of asymmetric acetylcholinesterase
Chr16	16_58157839_58158039	58157840	58158039	1.814	3' UTR	11087	ENSG00000070770	CSNK2A2	protein_coding	casein kinase 2 alpha 2
Chr10	10_17007063_17007263	17007064	17007263	1.814	Intron	-22869	ENSG00000107611	CUBN	protein_coding	cubilin
ChrX	X_28177513_28177713	28177514	28177713	1.814	Distal Intergenic	-196065	ENSG00000226372	DCAF8L1	protein_coding	DDB1 and CUL4 associated factor 8 like 1
Chr20	20_79692_79892	79693	79892	1.814	Distal Intergenic	-7358	ENSG00000178591	DEFB125	protein_coding	defensin beta 125
Chr3	3_57325016_57325216	57325017	57325216	1.814	Intron	-15772	ENSG00000174844	DNAH12	protein_coding	dynein axonemal heavy chain 12
Chr5	5_31495866_31496136	31495867	31496136	1.814	Intron	-6784	ENSG00000113360	DROSHA	protein_coding	drosha ribonuclease III
Chr2	2_25426846_25427046	25426847	25427046	1.814	Promoter (<=1kb)	970	ENSG00000138101	DTNB	protein_coding	dystrobrevin beta
Chr19	19_47998778_47998978	47998779	47998978	1.814	Intron	4070	ENSG00000169393	ELSPBP1	protein_coding	epididymal sperm binding protein 1
Chr5	5_65940166_65940431	65940167	65940431	1.814	Intron	13410	ENSG00000112851	ERBIN	protein_coding	erbb2 interacting protein
Chr1	1_172656300_172656500	172656301	172656500	1.814	Promoter (2-3kb)	-2603	ENSG00000117560	FASLG	protein_coding	Fas ligand
Chr14	14_91873823_91874023	91873824	91874023	1.814	Promoter (<=1kb)	793	ENSG00000140092	FBLN5	protein_coding	fibulin 5
Chr9	9_77703670_77703870	77703671	77703870	1.814	Distal Intergenic	-55349	ENSG00000156049	GNA14	protein_coding	G protein subunit alpha 14
Chr1	1_236136718_236136991	236136719	236136991	1.814	Distal Intergenic	-5514	ENSG00000077585	GPR137B	protein_coding	G protein-coupled receptor 137B
Chr21	21_43573398_43573598	43573399	43573598	1.814	Intron	8217	ENSG00000234289	H2BC12L	protein_coding	H2B clustered histone 12 like
Chr14	14_102129671_102129871	102129672	102129871	1.814	Intron	9594	ENSG00000080824	HSP90AA1	protein_coding	heat shock protein 90 alpha family class A member 1
Chr1	1_181096840_181097040	181096841	181097040	1.814	Distal Intergenic	8141	ENSG00000162783	IER5	protein_coding	immediate early response 5
Chr1	1_18365331_18365585	18365332	18365585	1.814	Exon	3965	ENSG00000117154	IGSF21	protein_coding	immunoglobin superfamily member 21
Chr11	11_2790750_2790950	2790751	2790950	1.814	Intron	13176	ENSG00000053918	KCNQ1	protein_coding	potassium voltage-gated channel subfamily Q member 1
Chr3	3_66518760_66518960	66518761	66518960	1.814	Distal Intergenic	-17498	ENSG00000144749	LRIG1	protein_coding	leucine rich repeats and immunoglobulin like domains 1
Chr3	3_26671554_26671754	26671555	26671754	1.814	Intron	-22801	ENSG00000179796	LRRC3B	protein_coding	leucine rich repeat containing 3B
Chr1	1_206723011_206723211	206723012	206723211	1.814	Intron	-5723	ENSG00000162889	MAPKAPK2	protein_coding	MAPK activated protein kinase 2
Chr10	10_97706987_97707253	97706988	97707253	1.814	Distal Intergenic	-5920	ENSG00000155254	MARVELD1	protein_coding	MARVEL domain containing 1
Chr6	6_29488492_29488692	29488493	29488692	1.814	Promoter (<=1kb)	-537	ENSG00000204687	MAS1L	protein_coding	MAS1 proto-oncogene like, G protein-coupled receptor
Chr2	2_8993283_8993483	8993284	8993483	1.814	Intron	10175	ENSG00000143797	MBOAT2	protein_coding	membrane bound O-acyltransferase domain containing 2
Chr18	18_13884967_13885167	13884968	13885167	1.814	Exon	30369	ENSG00000185231	MC2R	protein_coding	melanocortin 2 receptor
Chr3	3_136180657_136180857	136180658	136180857	1.814	Intron	13697	ENSG00000174579	MSL2	protein_coding	MSL complex subunit 2
Chr11	11_92969210_92969410	92969211	92969410	1.814	Promoter (<=1kb)	-241	ENSG00000134640	MTNR1B	protein_coding	melatonin receptor 1B
Chr2	2_203207052_203207252	203207053	203207252	1.814	Promoter (1-2kb)	-1383	ENSG00000144426	NBEAL1	protein_coding	neurobeachin like 1
Chr11	11_17352997_17353199	17352998	17353199	1.814	Promoter (1-2kb)	1099	ENSG00000188211	NCR3LG1	protein_coding	natural killer cell cytotoxicity receptor 3 ligand 1
Chr8	8_62248107_62248307	62248108	62248307	1.814	Promoter (<=1kb)	-284	ENSG00000185942	NKAIN3	protein_coding	sodium/potassium transporting ATPase interacting 3
Chr2	2_205746670_205746915	205746671	205746915	1.814	Promoter (2-3kb)	-2776	ENSG00000118257	NRP2	protein_coding	neuropilin 2
Chr17	17_8347026_8347226	8347027	8347226	1.814	Distal Intergenic	6569	ENSG00000184650	ODF4	protein_coding	outer dense fiber of sperm tails 4
Chr1	1_248528617_248528817	248528618	248528817	1.814	Distal Intergenic	19082	ENSG00000188558	OR2G6	protein_coding	olfactory receptor family 2 subfamily G member 6
Chr9	9_111334609_111334809	111334610	111334809	1.814	Distal Intergenic	-4386	ENSG00000171133	OR2K2	protein_coding	olfactory receptor family 2 subfamily K member 2
Chr11	11_6818492_6818724	6818493	6818724	1.814	Distal Intergenic	-18804	ENSG00000184933	OR6A2	protein_coding	olfactory receptor family 6 subfamily A member 2
Chr19	19_14954407_14954624	14954408	14954624	1.814	Intron	12919	ENSG00000127529	OR7C2	protein_coding	olfactory receptor family 7 subfamily C member 2
Chr3	3_52635893_52636093	52635894	52636093	1.814	Intron	-20495	ENSG00000163939	PBRM1	protein_coding	polybromo 1
Chr16	16_70128869_70129069	70128870	70129069	1.814	Promoter (2-3kb)	-2864	ENSG00000090857	PDPR	protein_coding	pyruvate dehydrogenase phosphatase regulatory subunit
Chr1	1_151233172_151233372	151233173	151233372	1.814	Promoter (<=1kb)	-250	ENSG00000143398	PIP5K1A	protein_coding	phosphatidylinositol-4-phosphate 5-kinase type 1 alpha
Chr1	1_204292661_204292861	204292662	204292861	1.814	Intron	-14273	ENSG00000143850	PLEKHA6	protein_coding	pleckstrin homology domain containing A6
Chr20	20_35166825_35167025	35166826	35167025	1.814	Distal Intergenic	-5047	ENSG00000101000	PROCR	protein_coding	protein C receptor
Chr17	17_39989906_39990219	39989907	39990219	1.814	Promoter (2-3kb)	-2779	ENSG00000108344	PSMD3	protein_coding	proteasome 26S subunit, non-ATPase 3
Chr9	9_95553152_95553352	95553153	95553352	1.814	Distal Intergenic	-36096	ENSG00000185920	PTCH1	protein_coding	patched 1
Chr2	2_237798496_237798696	237798497	237798696	1.814	Promoter (<=1kb)	-56	ENSG00000177483	RBM44	protein_coding	RNA binding motif protein 44
Chr18	18_36048194_36048394	36048195	36048394	1.814	Intron	16030	ENSG00000141425	RPRD1A	protein_coding	regulation of nuclear pre-mRNA domain containing 1A
Chr15	15_33789672_33789872	33789673	33789872	1.814	Intron	-20789	ENSG00000198838	RYR3	protein_coding	ryanodine receptor 3
Chr6	6_130150967_130151394	130150968	130151394	1.814	Intron	3459	ENSG00000164483	SAMD3	protein_coding	sterile alpha motif domain containing 3
Chr9	9_89350943_89351143	89350944	89351143	1.814	Promoter (2-3kb)	2796	ENSG00000187742	SECISBP2	protein_coding	SECIS binding protein 2
Chr14	14_99422687_99422887	99422688	99422887	1.814	Intron	-9438	ENSG00000183576	SETD3	protein_coding	SET domain containing 3, actin N3(tau)-histidine methyltransferase
ChrX	X_81280214_81280414	81280215	81280414	1.814	Intron	24721	ENSG00000131171	SH3BGRL	protein_coding	SH3 domain binding glutamate rich protein like
Chr14	14_69785168_69785368	69785169	69785368	1.814	Intron	11873	ENSG00000100652	SLC10A1	protein_coding	solute carrier family 10 member 1
ChrX	X_46607872_46608072	46607873	46608072	1.814	Intron	12944	ENSG00000065923	SLC9A7	protein_coding	solute carrier family 9 member A7
Chr1	1_109335114_109335314	109335115	109335314	1.814	Promoter (<=1kb)	988	ENSG00000134243	SORT1	protein_coding	sortilin 1
Chr13	13_112434200_112434400	112434201	112434400	1.814	Intron	51923	ENSG00000153498	SPACA7	protein_coding	sperm acrosome associated 7
Chr2	2_65360032_65360232	65360033	65360232	1.814	Intron	6418	ENSG00000198369	SPRED2	protein_coding	sprouty related EVH1 domain containing 2
Chr1	1_234424654_234424854	234424655	234424854	1.814	Intron	-3841	ENSG00000059588	TARBP1	protein_coding	TAR (HIV-1) RNA binding protein 1
Chr16	16_66774280_66774480	66774281	66774480	1.814	Intron	-15073	ENSG00000249961	TERB1	protein_coding	telomere repeat binding bouquet formation protein 1
Chr15	15_43254091_43254291	43254092	43254291	1.814	Promoter (<=1kb)	-434	ENSG00000104055	TGM5	protein_coding	transglutaminase 5
Chr1	1_168161944_168162173	168161945	168162173	1.814	Distal Intergenic	-16789	ENSG00000143155	TIPRL	protein_coding	TOR signaling pathway regulator
Chr16	16_18969484_18969684	18969485	18969684	1.814	Distal Intergenic	-14250	ENSG00000170537	TMC7	protein_coding	transmembrane channel like 7
Chr11	11_57289070_57289403	57289071	57289403	1.814	Distal Intergenic	11276	ENSG00000149115	TNKS1BP1	protein_coding	tankyrase 1 binding protein 1
Chr14	14_51166200_51166400	51166201	51166400	1.814	Distal Intergenic	-70140	ENSG00000100505	TRIM9	protein_coding	tripartite motif containing 9
Chr12	12_104358245_104358602	104358246	104358602	1.814	Distal Intergenic	24119	ENSG00000198431	TXNRD1	protein_coding	thioredoxin reductase 1
Chr6	6_89345548_89345748	89345549	89345748	1.814	Intron	6974	ENSG00000198833	UBE2J1	protein_coding	ubiquitin conjugating enzyme E2 J1
Chr1	1_162475148_162475348	162475149	162475348	1.814	Distal Intergenic	-21903	ENSG00000152332	UHMK1	protein_coding	U2AF homology motif kinase 1
Chr10	10_109917998_109918198	109917999	109918198	1.814	Promoter (2-3kb)	-2820	ENSG00000108039	XPNPEP1	protein_coding	X-prolyl aminopeptidase 1
Chr7	7_100414806_100415006	100414807	100415006	1.814	Promoter (2-3kb)	2415	ENSG00000078487	ZCWPW1	protein_coding	zinc finger CW-type and PWWP domain containing 1
Chr1	1_35060222_35060422	35060223	35060422	1.814	Promoter (<=1kb)	437	ENSG00000197056	ZMYM1	protein_coding	zinc finger MYM-type containing 1
Chr19	19_44334964_44335164	44334965	44335164	1.814	Intron	21510	ENSG00000062370	ZNF112	protein_coding	zinc finger protein 112
Chr8	8_7393135_7393335	7393136	7393335	1.814	Distal Intergenic	-7578	ENSG00000215372	ZNF705G	protein_coding	zinc finger protein 705G
Chr4	4_124564_124764	124565	124764	1.814	Promoter (<=1kb)	27	ENSG00000250312	ZNF718	protein_coding	zinc finger protein 718
Chr10	10_79165428_79165774	79165429	79165774	1.76819	Intron	-77895	ENSG00000108175	ZMIZ1	protein_coding	zinc finger MIZ-type containing 1
Chr1	1_36323411_36323611	36323412	36323611	1.76153	Promoter (<=1kb)	34	ENSG00000142694	EVA1B	protein_coding	eva-1 homolog B
Chr22	22_39642209_39642473	39642210	39642473	1.7526	Promoter (<=1kb)	-324	ENSG00000100346	CACNA1I	protein_coding	calcium voltage-gated channel subunit alpha1 I
Chr13	13_79367087_79367439	79367088	79367439	1.74688	Promoter (<=1kb)	-378	ENSG00000139746	RBM26	protein_coding	RNA binding motif protein 26
Chr10	10_5906283_5906483	5906284	5906483	1.74	Promoter (<=1kb)	-23	ENSG00000134452	FBH1	protein_coding	F-box DNA helicase 1
Chr5	5_155936518_155937052	155936519	155937052	1.74	Intron	66175	ENSG00000170624	SGCD	protein_coding	sarcoglycan delta
Chr3	3_47749859_47750155	47749860	47750155	1.74	Intron	-3455	ENSG00000173473	SMARCC1	protein_coding	SWI/SNF related, matrix associated, actin dependent regulator of chromatin subfamily c member 1
Chr7	7_22821376_22821576	22821377	22821576	1.74	Promoter (<=1kb)	768	ENSG00000196683	TOMM7	protein_coding	translocase of outer mitochondrial membrane 7
Chr16	16_89357104_89357353	89357105	89357353	1.73154	Intron	-13282	ENSG00000167522	ANKRD11	protein_coding	ankyrin repeat domain containing 11
Chr2	2_37168183_37168610	37168184	37168610	1.73154	Intron	-10662	ENSG00000055332	EIF2AK2	protein_coding	eukaryotic translation initiation factor 2 alpha kinase 2
Chr5	5_138518154_138518501	138518155	138518501	1.73154	Promoter (<=1kb)	-493	ENSG00000120705	ETF1	protein_coding	eukaryotic translation termination factor 1
Chr6	6_119015474_119015816	119015475	119015816	1.73154	Intron	4250	ENSG00000111879	FAM184A	protein_coding	family with sequence similarity 184 member A
Chr10	10_117217267_117217522	117217268	117217522	1.73154	Distal Intergenic	19779	ENSG00000186795	KCNK18	protein_coding	potassium two pore domain channel subfamily K member 18
Chr1	1_201649205_201649405	201649206	201649405	1.73154	Promoter (<=1kb)	957	ENSG00000134369	NAV1	protein_coding	neuron navigator 1
Chr4	4_153239069_153239327	153239070	153239327	1.73154	Intron	16590	ENSG00000109654	TRIM2	protein_coding	tripartite motif containing 2
Chr2	2_61518033_61518327	61518034	61518327	1.73154	Intron	-3052	ENSG00000082898	XPO1	protein_coding	exportin 1
Chr5	5_171545083_171545283	171545084	171545283	1.72089	Distal Intergenic	125437	ENSG00000156427	FGF18	protein_coding	fibroblast growth factor 18
Chr15	15_98923422_98923699	98923423	98923699	1.72089	Promoter (<=1kb)	-83	ENSG00000140443	IGF1R	protein_coding	insulin like growth factor 1 receptor
Chr9	9_126781742_126782015	126781743	126782015	1.72089	Distal Intergenic	-22991	ENSG00000169155	ZBTB43	protein_coding	zinc finger and BTB domain containing 43
Chr3	3_195812380_195812647	195812381	195812647	1.71446	Promoter (<=1kb)	-408	ENSG00000145113	MUC4	protein_coding	mucin 4, cell surface associated
Chr1	1_176057977_176058177	176057978	176058177	1.70708	Intron	23079	ENSG00000143207	COP1	protein_coding	COP1 E3 ubiquitin ligase
Chr2	2_203231296_203231638	203231297	203231638	1.70708	Distal Intergenic	-7339	ENSG00000119004	CYP20A1	protein_coding	cytochrome P450 family 20 subfamily A member 1
Chr6	6_2190721_2191057	2190722	2191057	1.70708	Intron	-14731	ENSG00000112699	GMDS	protein_coding	GDP-mannose 4,6-dehydratase
Chr10	10_119469024_119469332	119469025	119469332	1.70708	Distal Intergenic	16577	ENSG00000198873	GRK5	protein_coding	G protein-coupled receptor kinase 5
Chr7	7_139729236_139729436	139729237	139729436	1.70708	Intron	-12224	ENSG00000064393	HIPK2	protein_coding	homeodomain interacting protein kinase 2
Chr4	4_6879648_6879848	6879649	6879848	1.70708	Intron	23850	ENSG00000170871	KIAA0232	protein_coding	KIAA0232
Chr18	18_13388789_13389116	13388790	13389116	1.70708	Promoter (1-2kb)	1449	ENSG00000168675	LDLRAD4	protein_coding	low density lipoprotein receptor class A domain containing 4
ChrX	X_100555627_100555945	100555628	100555945	1.70708	Distal Intergenic	-28991	ENSG00000000005	TNMD	protein_coding	tenomodulin
Chr7	7_47582231_47582513	47582232	47582513	1.70708	Promoter (<=1kb)	45	ENSG00000136205	TNS3	protein_coding	tensin 3
Chr1	1_35172265_35172642	35172266	35172642	1.69852	Distal Intergenic	5019	ENSG00000116560	SFPQ	protein_coding	splicing factor proline and glutamine rich
Chr22	22_43196480_43196829	43196481	43196829	1.69852	Downstream (<1kb)	-9347	ENSG00000100304	TTLL12	protein_coding	tubulin tyrosine ligase like 12
Chr10	10_13529213_13529687	13529214	13529687	1.68847	Promoter (<=1kb)	-200	ENSG00000165626	BEND7	protein_coding	BEN domain containing 7
Chr4	4_140413379_140413579	140413380	140413579	1.68847	Intron	14031	ENSG00000153132	CLGN	protein_coding	calmegin
ChrX	X_146831988_146832188	146831989	146832188	1.68847	Distal Intergenic	-17245	ENSG00000224440	CXorf51A	protein_coding	chromosome X open reading frame 51A
Chr1	1_68093312_68093566	68093313	68093566	1.68847	Intron	-41596	ENSG00000162595	DIRAS3	protein_coding	DIRAS family GTPase 3
Chr11	11_85548900_85549134	85548901	85549134	1.68847	Intron	-23879	ENSG00000150672	DLG2	protein_coding	discs large MAGUK scaffold protein 2
Chr8	8_131904818_131905018	131904819	131905018	1.68847	Promoter (<=1kb)	710	ENSG00000132294	EFR3A	protein_coding	EFR3 homolog A
Chr8	8_81570804_81571004	81570805	81571004	1.68847	Intron	19135	ENSG00000197416	FABP12	protein_coding	fatty acid binding protein 12
Chr1	1_200567318_200567518	200567319	200567518	1.68847	Intron	51205	ENSG00000118193	KIF14	protein_coding	kinesin family member 14
Chr6	6_77996705_77996905	77996706	77996905	1.68847	Distal Intergenic	306050	ENSG00000269964	MEI4	protein_coding	meiotic double-stranded break formation protein 4
Chr10	10_79843690_79844001	79843691	79844001	1.68847	Promoter (2-3kb)	2333	ENSG00000228570	NUTM2E	protein_coding	NUT family member 2E
Chr11	11_73257698_73257898	73257699	73257898	1.68847	Distal Intergenic	-6600	ENSG00000171631	P2RY6	protein_coding	pyrimidinergic receptor P2Y6
Chr10	10_70585745_70585991	70585746	70585991	1.68847	Intron	16696	ENSG00000180644	PRF1	protein_coding	perforin 1
Chr6	6_25788389_25788589	25788390	25788589	1.68847	Intron	26467	ENSG00000146039	SLC17A4	protein_coding	solute carrier family 17 member 4
Chr3	3_133167630_133167864	133167631	133167864	1.68847	Intron	-24911	ENSG00000144868	TMEM108	protein_coding	transmembrane protein 108
Chr22	22_40182002_40182240	40182003	40182240	1.68847	Intron	4061	ENSG00000100354	TNRC6B	protein_coding	trinucleotide repeat containing adaptor 6B
Chr6	6_169659505_169659716	169659506	169659716	1.68847	Promoter (<=1kb)	976	ENSG00000184465	WDR27	protein_coding	WD repeat domain 27
Chr2	2_19985269_19985469	19985270	19985469	1.68847	Intron	4579	ENSG00000118965	WDR35	protein_coding	WD repeat domain 35
Chr5	5_32350741_32350941	32350742	32350941	1.68847	Distal Intergenic	13997	ENSG00000056097	ZFR	protein_coding	zinc finger RNA binding protein
Chr11	11_45872851_45873051	45872852	45873051	1.67649	Promoter (2-3kb)	2239	ENSG00000121671	CRY2	protein_coding	cryptochrome circadian regulator 2
Chr3	3_18443577_18443777	18443578	18443777	1.67649	Promoter (1-2kb)	1040	ENSG00000131374	TBC1D5	protein_coding	TBC1 domain family member 5
Chr7	7_48426469_48426669	48426470	48426669	1.66199	Intron	-28394	ENSG00000179869	ABCA13	protein_coding	ATP binding cassette subfamily A member 13
Chr6	6_135363593_135363793	135363594	135363793	1.66199	Intron	-38591	ENSG00000135541	AHI1	protein_coding	Abelson helper integration site 1
Chr2	2_70943105_70943308	70943106	70943308	1.66199	Promoter (<=1kb)	-66	ENSG00000116039	ATP6V1B1	protein_coding	ATPase H+ transporting V1 subunit B1
Chr11	11_115181724_115181924	115181725	115181924	1.66199	Promoter (2-3kb)	-2614	ENSG00000182985	CADM1	protein_coding	cell adhesion molecule 1
Chr9	9_15810288_15810488	15810289	15810488	1.66199	Intron	32521	ENSG00000164989	CCDC171	protein_coding	coiled-coil domain containing 171
Chr20	20_37718410_37718610	37718411	37718610	1.66199	Intron	24349	ENSG00000132792	CTNNBL1	protein_coding	catenin beta like 1
Chr5	5_134797031_134797231	134797032	134797231	1.66199	Intron	6879	ENSG00000145833	DDX46	protein_coding	DEAD-box helicase 46
ChrX	X_72832571_72832771	72832572	72832771	1.66199	Intron	-10012	ENSG00000184911	DMRTC1B	protein_coding	DMRT like family C1B
Chr1	1_92715743_92715943	92715744	92715943	1.66199	Promoter (1-2kb)	-1651	ENSG00000067208	EVI5	protein_coding	ecotropic viral integration site 5
Chr4	4_17709640_17709840	17709641	17709840	1.66199	Exon	71781	ENSG00000047662	FAM184B	protein_coding	family with sequence similarity 184 member B
Chr12	12_4417319_4417519	4417320	4417519	1.66199	Distal Intergenic	11196	ENSG00000111241	FGF6	protein_coding	fibroblast growth factor 6
Chr12	12_8038286_8038486	8038287	8038486	1.66199	Intron	4927	ENSG00000065970	FOXJ2	protein_coding	forkhead box J2
Chr9	9_98845638_98845838	98845639	98845838	1.66199	Promoter (2-3kb)	-2934	ENSG00000119514	GALNT12	protein_coding	polypeptide N-acetylgalactosaminyltransferase 12
Chr3	3_186653977_186654177	186653978	186654177	1.66199	Intron	-6039	ENSG00000113905	HRG	protein_coding	histidine rich glycoprotein
Chr3	3_134677301_134677501	134677302	134677501	1.66199	Intron	-25666	ENSG00000174611	KY	protein_coding	kyphoscoliosis peptidase
Chr11	11_113081308_113081508	113081309	113081508	1.66199	Intron	-49186	ENSG00000149294	NCAM1	protein_coding	neural cell adhesion molecule 1
ChrX	X_68032604_68032804	68032605	68032804	1.66199	Intron	15778	ENSG00000079482	OPHN1	protein_coding	oligophrenin 1
Chr1	1_145971973_145972173	145971974	145972173	1.66199	Intron	7258	ENSG00000121851	POLR3GL	protein_coding	RNA polymerase III subunit GL
Chr1	1_46228641_46228841	46228642	46228841	1.66199	Distal Intergenic	-8337	ENSG00000085998	POMGNT1	protein_coding	protein O-linked mannose N-acetylglucosaminyltransferase 1 (beta 1,2-)
Chr12	12_112545547_112545747	112545548	112545747	1.66199	Distal Intergenic	-24633	ENSG00000089169	RPH3A	protein_coding	rabphilin 3A
Chr3	3_11021876_11022076	11021877	11022076	1.66199	Promoter (<=1kb)	757	ENSG00000157103	SLC6A1	protein_coding	solute carrier family 6 member 1
Chr3	3_111587664_111587864	111587665	111587864	1.66199	Intron	7482	ENSG00000177494	ZBED2	protein_coding	zinc finger BED-type containing 2
Chr1	1_235174801_235175001	235174802	235175001	1.64407	Promoter (<=1kb)	642	ENSG00000054267	ARID4B	protein_coding	AT-rich interaction domain 4B
Chr16	16_86531979_86532292	86531980	86532292	1.64407	Promoter (1-2kb)	1508	ENSG00000103248	MTHFSD	protein_coding	methenyltetrahydrofolate synthetase domain containing
Chr16	16_68387371_68387587	68387372	68387587	1.64407	Intron	-15114	ENSG00000103056	SMPD3	protein_coding	sphingomyelin phosphodiesterase 3
Chr14	14_20384044_20384334	20384045	20384334	1.64407	Promoter (1-2kb)	-1783	ENSG00000129566	TEP1	protein_coding	telomerase associated protein 1
Chr5	5_90795124_90795324	90795125	90795324	1.62135	Intron	3970	ENSG00000164199	ADGRV1	protein_coding	adhesion G protein-coupled receptor V1
Chr9	9_131111418_131111618	131111419	131111618	1.62135	Promoter (<=1kb)	17	ENSG00000126878	AIF1L	protein_coding	allograft inflammatory factor 1 like
Chr17	17_68378574_68378857	68378575	68378857	1.62135	Intron	-21299	ENSG00000141337	ARSG	protein_coding	arylsulfatase G
Chr1	1_212580163_212580363	212580164	212580363	1.62135	Intron	14830	ENSG00000162772	ATF3	protein_coding	activating transcription factor 3
ChrX	X_108444170_108444370	108444171	108444370	1.62135	Intron	4229	ENSG00000188153	COL4A5	protein_coding	collagen type IV alpha 5 chain
Chr15	15_68589984_68590184	68589985	68590184	1.62135	Intron	10992	ENSG00000103647	CORO2B	protein_coding	coronin 2B
Chr3	3_132285482_132285682	132285483	132285682	1.62135	Promoter (<=1kb)	-73	ENSG00000196353	CPNE4	protein_coding	copine 4
Chr14	14_102025100_102025300	102025101	102025300	1.62135	Promoter (1-2kb)	-1648	ENSG00000197102	DYNC1H1	protein_coding	dynein cytoplasmic 1 heavy chain 1
Chr14	14_31137084_31137284	31137085	31137284	1.62135	Promoter (<=1kb)	-247	ENSG00000092148	HECTD1	protein_coding	HECT domain E3 ubiquitin protein ligase 1
Chr2	2_197507154_197507354	197507155	197507354	1.62135	Intron	6273	ENSG00000115541	HSPE1	protein_coding	heat shock protein family E (Hsp10) member 1
Chr4	4_142435687_142435887	142435688	142435887	1.62135	Intron	-4429	ENSG00000109452	INPP4B	protein_coding	inositol polyphosphate-4-phosphatase type II B
Chr7	7_32865252_32865528	32865253	32865528	1.62135	Downstream (2-3kb)	13965	ENSG00000170852	KBTBD2	protein_coding	kelch repeat and BTB domain containing 2
Chr12	12_56707319_56707519	56707320	56707519	1.62135	Distal Intergenic	5877	ENSG00000196531	NACA	protein_coding	nascent polypeptide associated complex subunit alpha
Chr4	4_70713068_70713268	70713069	70713268	1.62135	Intron	8268	ENSG00000018189	RUFY3	protein_coding	RUN and FYVE domain containing 3
Chr6	6_75692777_75692977	75692778	75692977	1.62135	Intron	13967	ENSG00000112701	SENP6	protein_coding	SUMO specific peptidase 6
Chr5	5_140377527_140377727	140377528	140377727	1.62135	Intron	6079	ENSG00000113073	SLC4A9	protein_coding	solute carrier family 4 member 9
Chr12	12_21214373_21214573	21214374	21214573	1.62135	Intron	83180	ENSG00000134538	SLCO1B1	protein_coding	solute carrier organic anion transporter family member 1B1
Chr10	10_94418817_94419017	94418818	94419017	1.62135	Intron	16277	ENSG00000108239	TBC1D12	protein_coding	TBC1 domain family member 12
Chr14	14_52492501_52492701	52492502	52492701	1.62135	Intron	-21828	ENSG00000087301	TXNDC16	protein_coding	thioredoxin domain containing 16
Chr2	2_98157715_98157915	98157716	98157915	1.62135	Intron	29563	ENSG00000168658	VWA3B	protein_coding	von Willebrand factor A domain containing 3B
Chr4	4_81215606_81215894	81215607	81215894	1.60249	Promoter (<=1kb)	-385	ENSG00000138669	PRKG2	protein_coding	protein kinase cGMP-dependent 2
Chr14	14_34462831_34463033	34462832	34463033	1.59827	Promoter (<=1kb)	-58	ENSG00000129521	EGLN3	protein_coding	egl-9 family hypoxia inducible factor 3
Chr14	14_77980799_77981073	77980800	77981073	1.5916	Distal Intergenic	57568	ENSG00000063761	ADCK1	protein_coding	aarF domain containing kinase 1
ChrX	X_131058614_131058956	131058615	131058956	1.5916	Promoter (<=1kb)	258	ENSG00000147256	ARHGAP36	protein_coding	Rho GTPase activating protein 36
Chr1	1_179744091_179744314	179744092	179744314	1.5916	Promoter (<=1kb)	801	ENSG00000143340	FAM163A	protein_coding	family with sequence similarity 163 member A
Chr15	15_82953046_82953246	82953047	82953246	1.5916	Promoter (<=1kb)	-319	ENSG00000103942	HOMER2	protein_coding	homer scaffold protein 2
Chr14	14_94138808_94139151	94138809	94139151	1.5916	Distal Intergenic	-6977	ENSG00000119698	PPP4R4	protein_coding	protein phosphatase 4 regulatory subunit 4
Chr22	22_24807462_24807989	24807463	24807989	1.5916	Promoter (1-2kb)	1144	ENSG00000167037	SGSM1	protein_coding	small G protein signaling modulator 1
Chr7	7_151290952_151291260	151290953	151291260	1.5916	Distal Intergenic	-13057	ENSG00000082014	SMARCD3	protein_coding	SWI/SNF related, matrix associated, actin dependent regulator of chromatin, subfamily d, member 3
Chr10	10_122234034_122234234	122234035	122234234	1.5916	Intron	-3725	ENSG00000138162	TACC2	protein_coding	transforming acidic coiled-coil containing protein 2
Chr14	14_105511824_105512024	105511825	105512024	1.5916	Distal Intergenic	14199	ENSG00000185347	TEDC1	protein_coding	tubulin epsilon and delta complex 1
Chr2	2_6866156_6866356	6866157	6866356	1.57953	Promoter (<=1kb)	155	ENSG00000134326	CMPK2	protein_coding	cytidine/uridine monophosphate kinase 2
Chr14	14_100708814_100709014	100708815	100709014	1.57953	Distal Intergenic	-16691	ENSG00000185559	DLK1	protein_coding	delta like non-canonical Notch ligand 1
Chr14	14_99791702_99791937	99791703	99791937	1.57953	Promoter (<=1kb)	-711	ENSG00000066629	EML1	protein_coding	EMAP like 1
Chr19	19_49403198_49403398	49403199	49403398	1.57953	Intron	-4239	ENSG00000161609	KASH5	protein_coding	KASH domain containing 5
Chr19	19_501582_501830	501583	501830	1.57953	Exon	3766	ENSG00000099866	MADCAM1	protein_coding	mucosal vascular addressin cell adhesion molecule 1
Chr10	10_22544758_22544958	22544759	22544958	1.57953	Intron	-5124	ENSG00000150867	PIP4K2A	protein_coding	phosphatidylinositol-5-phosphate 4-kinase type 2 alpha
Chr5	5_78440778_78441165	78440779	78441165	1.57953	Intron	-16628	ENSG00000085365	SCAMP1	protein_coding	secretory carrier membrane protein 1
Chr14	14_51203490_51203969	51203491	51203969	1.57953	Distal Intergenic	-36193	ENSG00000139921	TMX1	protein_coding	thioredoxin related transmembrane protein 1
Chr4	4_82798344_82798641	82798345	82798641	1.57299	Promoter (<=1kb)	131	ENSG00000145284	SCD5	protein_coding	stearoyl-CoA desaturase 5
Chr3	3_127661714_127661927	127661715	127661927	1.55096	Intron	-11008	ENSG00000114626	ABTB1	protein_coding	ankyrin repeat and BTB domain containing 1
Chr12	12_45285510_45285712	45285511	45285712	1.55096	Intron	-6965	ENSG00000177119	ANO6	protein_coding	anoctamin 6
Chr2	2_47194840_47195040	47194841	47195040	1.55096	Intron	-17920	ENSG00000143933	CALM2	protein_coding	calmodulin 2
Chr12	12_50161818_50162018	50161819	50162018	1.55096	Intron	5282	ENSG00000139624	CERS5	protein_coding	ceramide synthase 5
Chr4	4_183350269_183350469	183350270	183350469	1.55096	Distal Intergenic	-27844	ENSG00000185758	CLDN24	protein_coding	claudin 24
ChrX	X_8800236_8800436	8800237	8800436	1.55096	Promoter (<=1kb)	901	ENSG00000183304	FAM9A	protein_coding	family with sequence similarity 9 member A
Chr1	1_59533038_59533271	59533039	59533271	1.55096	Intron	-20647	ENSG00000172456	FGGY	protein_coding	FGGY carbohydrate kinase domain containing
Chr8	8_43006161_43006361	43006162	43006361	1.55096	Intron	5343	ENSG00000168172	HOOK3	protein_coding	hook microtubule tethering protein 3
Chr6	6_137070446_137070646	137070447	137070646	1.55096	Distal Intergenic	-25267	ENSG00000016402	IL20RA	protein_coding	interleukin 20 receptor subunit alpha
Chr13	13_74124804_74125004	74124805	74125004	1.55096	Intron	8925	ENSG00000118922	KLF12	protein_coding	KLF transcription factor 12
Chr15	15_100941320_100941928	100941321	100941928	1.55096	Intron	16718	ENSG00000154237	LRRK1	protein_coding	leucine rich repeat kinase 1
Chr15	15_80976846_80977046	80976847	80977046	1.55096	Promoter (1-2kb)	1767	ENSG00000117899	MESD	protein_coding	mesoderm development LRP chaperone
Chr7	7_116716630_116717064	116716631	116717064	1.55096	Intron	-7082	ENSG00000105976	MET	protein_coding	MET proto-oncogene, receptor tyrosine kinase
Chr4	4_170040318_170040544	170040319	170040544	1.55096	Distal Intergenic	-7288	ENSG00000198948	MFAP3L	protein_coding	microfibril associated protein 3 like
Chr7	7_91831707_91831907	91831708	91831907	1.55096	Intron	48532	ENSG00000127989	MTERF1	protein_coding	mitochondrial transcription termination factor 1
Chr6	6_150856089_150856289	150856090	150856289	1.55096	Distal Intergenic	-9390	ENSG00000120254	MTHFD1L	protein_coding	methylenetetrahydrofolate dehydrogenase (NADP+ dependent) 1 like
Chr11	11_125230299_125230499	125230300	125230499	1.55096	Intron	-9564	ENSG00000165495	PKNOX2	protein_coding	PBX/knotted 1 homeobox 2
Chr10	10_70222217_70222417	70222218	70222417	1.55096	Intron	7962	ENSG00000180817	PPA1	protein_coding	inorganic pyrophosphatase 1
Chr14	14_61321859_61322059	61321860	61322059	1.55096	Promoter (<=1kb)	281	ENSG00000027075	PRKCH	protein_coding	protein kinase C eta
Chr10	10_62241537_62241737	62241538	62241737	1.55096	Intron	-5275	ENSG00000182010	RTKN2	protein_coding	rhotekin 2
Chr5	5_172049485_172049685	172049486	172049685	1.55096	Intron	3515	ENSG00000072786	STK10	protein_coding	serine/threonine kinase 10
Chr1	1_165839792_165840148	165839793	165840148	1.55096	Intron	11988	ENSG00000143179	UCK2	protein_coding	uridine-cytidine kinase 2
Chr20	20_45783862_45784189	45783863	45784189	1.55096	Intron	-3970	ENSG00000124116	WFDC3	protein_coding	WAP four-disulfide core domain 3
Chr7	7_64784773_64784973	64784774	64784973	1.55096	Distal Intergenic	-9415	ENSG00000197008	ZNF138	protein_coding	zinc finger protein 138
Chr4	4_145846709_145846909	145846710	145846909	1.55096	Promoter (<=1kb)	-718	ENSG00000151612	ZNF827	protein_coding	zinc finger protein 827
Chr9	9_77167763_77168145	77167764	77168145	1.5302	Distal Intergenic	-9300	ENSG00000197969	VPS13A	protein_coding	vacuolar protein sorting 13 homolog A
Chr16	16_10901793_10902174	10901794	10902174	1.52449	Promoter (<=1kb)	235	ENSG00000179583	CIITA	protein_coding	class II major histocompatibility complex transactivator
Chr4	4_2913445_2913645	2913446	2913645	1.51444	Promoter (1-2kb)	-1060	ENSG00000087274	ADD1	protein_coding	adducin 1
Chr7	7_70614695_70614905	70614696	70614905	1.51444	Intron	18611	ENSG00000158321	AUTS2	protein_coding	activator of transcription and developmental regulator AUTS2
Chr7	7_139331433_139331779	139331434	139331779	1.51444	Distal Intergenic	-7678	ENSG00000164898	FMC1	protein_coding	formation of mitochondrial complex V assembly factor 1 homolog
Chr17	17_46512720_46512999	46512721	46512999	1.51444	Promoter (<=1kb)	8	ENSG00000238083	LRRC37A2	protein_coding	leucine rich repeat containing 37 member A2
Chr3	3_9685618_9685818	9685619	9685818	1.51444	Intron	10105	ENSG00000163719	MTMR14	protein_coding	myotubularin related protein 14
Chr20	20_391034_391530	391035	391530	1.51444	Exon	9738	ENSG00000101255	TRIB3	protein_coding	tribbles pseudokinase 3
Chr11	11_44725589_44725789	44725590	44725789	1.51444	Promoter (<=1kb)	-676	ENSG00000157570	TSPAN18	protein_coding	tetraspanin 18
Chr19	19_12989170_12989409	12989171	12989409	1.50914	Distal Intergenic	-6066	ENSG00000008441	NFIX	protein_coding	nuclear factor I X
Chr6	6_31637385_31637585	31637386	31637585	1.50588	Promoter (<=1kb)	551	ENSG00000204469	PRRC2A	protein_coding	proline rich coiled-coil 2A
Chr19	19_55209820_55210094	55209821	55210094	1.50588	Promoter (<=1kb)	-315	ENSG00000080031	PTPRH	protein_coding	protein tyrosine phosphatase receptor type H
Chr5	5_136066892_136067208	136066893	136067208	1.50588	Distal Intergenic	5703	ENSG00000120708	TGFBI	protein_coding	transforming growth factor beta induced
Chr19	19_19034373_19034592	19034374	19034592	1.49207	Promoter (<=1kb)	173	ENSG00000105676	ARMC6	protein_coding	armadillo repeat containing 6
Chr10	10_113711506_113711706	113711507	113711706	1.49207	Promoter (2-3kb)	2162	ENSG00000165806	CASP7	protein_coding	caspase 7
Chr2	2_86791771_86791971	86791772	86791971	1.49207	Promoter (<=1kb)	-468	ENSG00000153563	CD8A	protein_coding	CD8 subunit alpha
Chr5	5_55186161_55186361	55186162	55186361	1.49207	Distal Intergenic	-12985	ENSG00000164287	CDC20B	protein_coding	cell division cycle 20B
Chr3	3_32664020_32664220	32664021	32664220	1.49207	Distal Intergenic	-20925	ENSG00000182973	CNOT10	protein_coding	CCR4-NOT transcription complex subunit 10
Chr6	6_168334304_168334504	168334305	168334504	1.49207	Distal Intergenic	-14528	ENSG00000164488	DACT2	protein_coding	dishevelled binding antagonist of beta catenin 2
Chr1	1_85344540_85344740	85344541	85344740	1.49207	Intron	59788	ENSG00000153904	DDAH1	protein_coding	dimethylarginine dimethylaminohydrolase 1
ChrX	X_44343363_44343563	44343364	44343563	1.49207	Promoter (<=1kb)	109	ENSG00000183690	EFHC2	protein_coding	EF-hand domain containing 2
Chr5	5_138049205_138049405	138049206	138049405	1.49207	Promoter (2-3kb)	2510	ENSG00000031003	FAM13B	protein_coding	family with sequence similarity 13 member B
Chr5	5_132477562_132477791	132477563	132477791	1.49207	Intron	-4520	ENSG00000125347	IRF1	protein_coding	interferon regulatory factor 1
Chr3	3_156291451_156291651	156291452	156291651	1.49207	Promoter (<=1kb)	-257	ENSG00000169282	KCNAB1	protein_coding	potassium voltage-gated channel subfamily A regulatory beta subunit 1
Chr5	5_170670585_170670785	170670586	170670785	1.49207	Intron	-10168	ENSG00000182132	KCNIP1	protein_coding	potassium voltage-gated channel interacting protein 1
Chr12	12_50463206_50463406	50463207	50463406	1.49207	Intron	22728	ENSG00000161813	LARP4	protein_coding	La ribonucleoprotein 4
ChrX	X_112671205_112671405	112671206	112671405	1.49207	5' UTR	8533	ENSG00000182508	LHFPL1	protein_coding	LHFPL tetraspan subfamily member 1
Chr2	2_43956751_43956951	43956752	43956951	1.49207	Promoter (<=1kb)	500	ENSG00000138095	LRPPRC	protein_coding	leucine rich pentatricopeptide repeat containing
Chr16	16_71625816_71626016	71625817	71626016	1.49207	Promoter (<=1kb)	-145	ENSG00000140832	MARVELD3	protein_coding	MARVEL domain containing 3
Chr8	8_106561211_106561411	106561212	106561411	1.49207	Intron	-19563	ENSG00000164830	OXR1	protein_coding	oxidation resistance 1
Chr4	4_107707098_107707298	107707099	107707298	1.49207	Intron	12725	ENSG00000138801	PAPSS1	protein_coding	3'-phosphoadenosine 5'-phosphosulfate synthase 1
Chr16	16_20401784_20401984	20401785	20401984	1.49207	Promoter (2-3kb)	2572	ENSG00000169340	PDILT	protein_coding	protein disulfide isomerase like, testis expressed
Chr3	3_52419648_52419848	52419649	52419848	1.49207	Promoter (<=1kb)	-72	ENSG00000010318	PHF7	protein_coding	PHD finger protein 7
Chr16	16_81110387_81110587	81110388	81110587	1.49207	Exon	3394	ENSG00000166473	PKD1L2	protein_coding	polycystin 1 like 2 (gene/pseudogene)
Chr6	6_36702530_36702730	36702531	36702730	1.49207	Intron	4705	ENSG00000255587	RAB44	protein_coding	RAB44, member RAS oncogene family
Chr8	8_52706581_52706781	52706582	52706781	1.49207	Intron	7642	ENSG00000023287	RB1CC1	protein_coding	RB1 inducible coiled-coil 1
Chr5	5_38969612_38969812	38969613	38969812	1.49207	Promoter (<=1kb)	808	ENSG00000164327	RICTOR	protein_coding	RPTOR independent companion of MTOR complex 2
Chr5	5_134159786_134159986	134159787	134159986	1.49207	Promoter (1-2kb)	1911	ENSG00000113558	SKP1	protein_coding	S-phase kinase associated protein 1
Chr8	8_47704453_47704653	47704454	47704653	1.49207	Intron	6698	ENSG00000164808	SPIDR	protein_coding	scaffold protein involved in DNA repair
ChrX	X_79771349_79771549	79771350	79771549	1.49207	Distal Intergenic	-243204	ENSG00000122145	TBX22	protein_coding	T-box transcription factor 22
Chr17	17_75991455_75991655	75991456	75991655	1.49207	Exon	5319	ENSG00000257949	TEN1	protein_coding	TEN1 subunit of CST complex
ChrX	X_155568144_155568344	155568145	155568344	1.49207	Intron	-22868	ENSG00000185973	TMLHE	protein_coding	trimethyllysine hydroxylase, epsilon
Chr13	13_26049752_26049952	26049753	26049952	1.47296	Promoter (2-3kb)	2064	ENSG00000180730	SHISA2	protein_coding	shisa family member 2
Chr4	4_7834824_7835024	7834825	7835024	1.46607	Intron	8813	ENSG00000196526	AFAP1	protein_coding	actin filament associated protein 1
Chr2	2_235608460_235608660	235608461	235608660	1.46607	Intron	-60944	ENSG00000157985	AGAP1	protein_coding	ArfGAP with GTPase domain, ankyrin repeat and PH domain 1
Chr3	3_126148316_126148516	126148317	126148516	1.46607	Intron	8167	ENSG00000144908	ALDH1L1	protein_coding	aldehyde dehydrogenase 1 family member L1
Chr18	18_33316393_33316593	33316394	33316593	1.46607	Intron	29629	ENSG00000166960	CCDC178	protein_coding	coiled-coil domain containing 178
Chr1	1_167517570_167517795	167517571	167517795	1.46607	Promoter (<=1kb)	734	ENSG00000198821	CD247	protein_coding	CD247 molecule
Chr12	12_38720927_38721133	38720928	38721133	1.46607	Promoter (<=1kb)	89	ENSG00000139117	CPNE8	protein_coding	copine 8
Chr1	1_160239855_160240055	160239856	160240055	1.46607	Promoter (<=1kb)	-871	ENSG00000132716	DCAF8	protein_coding	DDB1 and CUL4 associated factor 8
Chr3	3_183000084_183000309	183000085	183000309	1.46607	Distal Intergenic	-14132	ENSG00000043093	DCUN1D1	protein_coding	defective in cullin neddylation 1 domain containing 1
Chr9	9_68303796_68304045	68303797	68304045	1.46607	Promoter (<=1kb)	930	ENSG00000187559	FOXD4L3	protein_coding	forkhead box D4 like 3
Chr3	3_70949524_70949724	70949525	70949724	1.46607	Distal Intergenic	16628	ENSG00000114861	FOXP1	protein_coding	forkhead box P1
Chr6	6_32584252_32584452	32584253	32584452	1.46607	Promoter (<=1kb)	265	ENSG00000196126	HLA-DRB1	protein_coding	major histocompatibility complex, class II, DR beta 1
Chr19	19_41253778_41253978	41253779	41253978	1.46607	Intron	-8518	ENSG00000105323	HNRNPUL1	protein_coding	heterogeneous nuclear ribonucleoprotein U like 1
Chr4	4_11428656_11428856	11428657	11428856	1.46607	Promoter (<=1kb)	38	ENSG00000002587	HS3ST1	protein_coding	heparan sulfate-glucosamine 3-sulfotransferase 1
Chr20	20_14467438_14467705	14467439	14467705	1.46607	Intron	-25774	ENSG00000172264	MACROD2	protein_coding	mono-ADP ribosylhydrolase 2
Chr4	4_148323281_148323492	148323282	148323492	1.46607	Intron	44978	ENSG00000151623	NR3C2	protein_coding	nuclear receptor subfamily 3 group C member 2
Chr6	6_107833203_107833410	107833204	107833410	1.46607	Distal Intergenic	-8887	ENSG00000146285	SCML4	protein_coding	Scm polycomb group protein like 4
Chr6	6_82551691_82552064	82551692	82552064	1.46607	Distal Intergenic	187448	ENSG00000146242	TPBG	protein_coding	trophoblast glycoprotein
Chr21	21_32322743_32322943	32322744	32322943	1.46607	Intron	11391	ENSG00000142207	URB1	protein_coding	URB1 ribosome biogenesis homolog
Chr11	11_9523687_9523887	9523688	9523887	1.46607	Promoter (1-2kb)	-1334	ENSG00000166478	ZNF143	protein_coding	zinc finger protein 143
Chr1	1_244845558_244845988	244845559	244845988	1.45785	Promoter (2-3kb)	2901	ENSG00000153187	HNRNPU	protein_coding	heterogeneous nuclear ribonucleoprotein U
Chr20	20_6768387_6768648	6768388	6768648	1.45143	Promoter (<=1kb)	702	ENSG00000125845	BMP2	protein_coding	bone morphogenetic protein 2
Chr11	11_66599322_66599619	66599323	66599619	1.45143	Promoter (<=1kb)	-415	ENSG00000173992	CCS	protein_coding	copper chaperone for superoxide dismutase
Chr17	17_14236003_14236416	14236004	14236416	1.45143	Promoter (<=1kb)	446	ENSG00000223510	CDRT15	protein_coding	CMT1A duplicated region transcript 15
Chr2	2_65072328_65072528	65072329	65072528	1.45143	Promoter (1-2kb)	1600	ENSG00000011523	CEP68	protein_coding	centrosomal protein 68
ChrX	X_23998167_23998388	23998168	23998388	1.45143	Intron	26407	ENSG00000174010	KLHL15	protein_coding	kelch like family member 15
Chr6	6_112163430_112163680	112163431	112163680	1.45143	Promoter (1-2kb)	1484	ENSG00000112769	LAMA4	protein_coding	laminin subunit alpha 4
Chr1	1_149939068_149939268	149939069	149939268	1.45143	Promoter (2-3kb)	-2190	ENSG00000014914	MTMR11	protein_coding	myotubularin related protein 11
Chr19	19_38258782_38258982	38258783	38258982	1.45143	Promoter (2-3kb)	-2251	ENSG00000167641	PPP1R14A	protein_coding	protein phosphatase 1 regulatory inhibitor subunit 14A
Chr15	15_55290158_55290407	55290159	55290407	1.45143	Promoter (<=1kb)	-346	ENSG00000069974	RAB27A	protein_coding	RAB27A, member RAS oncogene family
Chr3	3_49404589_49404789	49404590	49404789	1.45143	Intron	6856	ENSG00000067560	RHOA	protein_coding	ras homolog family member A
Chr17	17_340373_340573	340374	340573	1.45143	Promoter (<=1kb)	-715	ENSG00000181031	RPH3AL	protein_coding	rabphilin 3A like (without C2 domains)
Chr6	6_160079050_160079250	160079051	160079250	1.44203	Intron	5635	ENSG00000197081	IGF2R	protein_coding	insulin like growth factor 2 receptor
Chr19	19_11050645_11050958	11050646	11050958	1.44203	Intron	9207	ENSG00000127616	SMARCA4	protein_coding	SWI/SNF related, matrix associated, actin dependent regulator of chromatin, subfamily a, member 4
Chr22	22_46803211_46803512	46803212	46803512	1.43067	Intron	29285	ENSG00000054611	TBC1D22A	protein_coding	TBC1 domain family member 22A
ChrX	X_47578744_47578944	47578745	47578944	1.42405	Intron	-3464	ENSG00000102265	TIMP1	protein_coding	TIMP metallopeptidase inhibitor 1
Chr5	5_154477416_154477785	154477417	154477785	1.41666	Promoter (<=1kb)	442	ENSG00000113196	HAND1	protein_coding	heart and neural crest derivatives expressed 1
Chr2	2_23385746_23386283	23385747	23386283	1.41346	Promoter (<=1kb)	568	ENSG00000119771	KLHL29	protein_coding	kelch like family member 29
Chr7	7_87464949_87465277	87464950	87465277	1.39896	Intron	10131	ENSG00000005471	ABCB4	protein_coding	ATP binding cassette subfamily B member 4
ChrX	X_75108157_75108357	75108158	75108357	1.39896	Intron	-34256	ENSG00000131269	ABCB7	protein_coding	ATP binding cassette subfamily B member 7
Chr2	2_70705459_70705659	70705460	70705659	1.39896	Promoter (<=1kb)	749	ENSG00000075340	ADD2	protein_coding	adducin 2
Chr2	2_26371557_26371757	26371558	26371757	1.39896	Intron	-24741	ENSG00000173567	ADGRF3	protein_coding	adhesion G protein-coupled receptor F3
Chr9	9_114367550_114367853	114367551	114367853	1.39896	5' UTR	9111	ENSG00000106948	AKNA	protein_coding	AT-hook transcription factor
Chr12	12_5636514_5636720	5636515	5636720	1.39896	Intron	-21220	ENSG00000047617	ANO2	protein_coding	anoctamin 2
Chr9	9_98012621_98012884	98012622	98012884	1.39896	Intron	14008	ENSG00000136938	ANP32B	protein_coding	acidic nuclear phosphoprotein 32 family member B
Chr13	13_111208671_111208871	111208672	111208871	1.39896	Intron	3383	ENSG00000102606	ARHGEF7	protein_coding	Rho guanine nucleotide exchange factor 7
Chr17	17_33291509_33291709	33291510	33291709	1.39896	Promoter (<=1kb)	-69	ENSG00000108684	ASIC2	protein_coding	acid sensing ion channel subunit 2
Chr16	16_341333_341533	341334	341533	1.39896	Intron	4789	ENSG00000103126	AXIN1	protein_coding	axin 1
Chr11	11_109423516_109423716	109423517	109423716	1.39896	Promoter (1-2kb)	1327	ENSG00000185742	C11orf87	protein_coding	chromosome 11 open reading frame 87
Chr6	6_165301956_165302156	165301957	165302156	1.39896	Exon	7449	ENSG00000112539	C6orf118	protein_coding	chromosome 6 open reading frame 118
Chr12	12_1908496_1908788	1908497	1908788	1.39896	Intron	6439	ENSG00000151062	CACNA2D4	protein_coding	calcium voltage-gated channel auxiliary subunit alpha2delta 4
Chr7	7_44349132_44349332	44349133	44349332	1.39896	Distal Intergenic	-14556	ENSG00000058404	CAMK2B	protein_coding	calcium/calmodulin dependent protein kinase II beta
Chr3	3_46162943_46163209	46162944	46163209	1.39896	Promoter (<=1kb)	-7	ENSG00000183625	CCR3	protein_coding	C-C motif chemokine receptor 3
Chr6	6_110259216_110259416	110259217	110259416	1.39896	Intron	34921	ENSG00000168438	CDC40	protein_coding	cell division cycle 40
Chr4	4_183454214_183454578	183454215	183454578	1.39896	Distal Intergenic	8074	ENSG00000168564	CDKN2AIP	protein_coding	CDKN2A interacting protein
Chr4	4_84597650_84597850	84597651	84597850	1.39896	Intron	14382	ENSG00000163624	CDS1	protein_coding	CDP-diacylglycerol synthase 1
Chr5	5_123401273_123401473	123401274	123401473	1.39896	Promoter (<=1kb)	-625	ENSG00000168944	CEP120	protein_coding	centrosomal protein 120
Chr18	18_27184337_27184537	27184338	27184537	1.39896	Promoter (<=1kb)	761	ENSG00000154080	CHST9	protein_coding	carbohydrate sulfotransferase 9
Chr9	9_134645095_134645295	134645096	134645295	1.39896	Intron	3293	ENSG00000130635	COL5A1	protein_coding	collagen type V alpha 1 chain
Chr9	9_87713675_87713875	87713676	87713875	1.39896	Distal Intergenic	-10176	ENSG00000135047	CTSL	protein_coding	cathepsin L
ChrX	X_101233892_101234092	101233893	101234092	1.39896	Promoter (2-3kb)	2348	ENSG00000102385	DRP2	protein_coding	dystrophin related protein 2
Chr17	17_37509973_37510173	37509974	37510173	1.39896	Promoter (<=1kb)	95	ENSG00000276023	DUSP14	protein_coding	dual specificity phosphatase 14
Chr10	10_99659872_99660072	99659873	99660072	1.39896	Promoter (<=1kb)	364	ENSG00000198018	ENTPD7	protein_coding	ectonucleoside triphosphate diphosphohydrolase 7
Chr7	7_148808198_148808398	148808199	148808398	1.39896	Intron	3425	ENSG00000106462	EZH2	protein_coding	enhancer of zeste 2 polycomb repressive complex 2 subunit
ChrX	X_54522452_54522652	54522453	54522652	1.39896	Distal Intergenic	-7531	ENSG00000130119	GNL3L	protein_coding	G protein nucleolar 3 like
Chr17	17_19125462_19125662	19125463	19125662	1.39896	Promoter (1-2kb)	-1873	ENSG00000189152	GRAPL	protein_coding	GRB2 related adaptor protein like
Chr4	4_105735394_105735629	105735395	105735629	1.39896	Intron	17769	ENSG00000138780	GSTCD	protein_coding	glutathione S-transferase C-terminal domain containing
Chr2	2_171970137_171970478	171970138	171970478	1.39896	Intron	5305	ENSG00000128708	HAT1	protein_coding	histone acetyltransferase 1
Chr12	12_47838269_47838469	47838270	47838469	1.39896	Distal Intergenic	-5138	ENSG00000061273	HDAC7	protein_coding	histone deacetylase 7
Chr2	2_196318711_196318911	196318712	196318911	1.39896	Promoter (<=1kb)	-15	ENSG00000138411	HECW2	protein_coding	HECT, C2 and WW domain containing E3 ubiquitin protein ligase 2
Chr12	12_56796094_56796369	56796095	56796369	1.39896	Distal Intergenic	10166	ENSG00000025423	HSD17B6	protein_coding	hydroxysteroid 17-beta dehydrogenase 6
Chr16	16_71905501_71905701	71905502	71905701	1.39896	Intron	9913	ENSG00000182149	IST1	protein_coding	IST1 factor associated with ESCRT-III
Chr2	2_162838981_162839194	162838982	162839194	1.39896	Promoter (<=1kb)	-215	ENSG00000184611	KCNH7	protein_coding	potassium voltage-gated channel subfamily H member 7
Chr6	6_39280813_39281039	39280814	39281039	1.39896	Distal Intergenic	33380	ENSG00000124780	KCNK17	protein_coding	potassium two pore domain channel subfamily K member 17
Chr1	1_166989398_166989605	166989399	166989605	1.39896	Promoter (<=1kb)	111	ENSG00000143194	MAEL	protein_coding	maelstrom spermatogenic transposon silencer
Chr19	19_16581337_16581563	16581338	16581563	1.39896	Promoter (2-3kb)	-2561	ENSG00000105085	MED26	protein_coding	mediator complex subunit 26
Chr11	11_1959760_1959960	1959761	1959960	1.39896	Intron	4184	ENSG00000214026	MRPL23	protein_coding	mitochondrial ribosomal protein L23
Chr17	17_8518038_8518369	8518039	8518369	1.39896	Intron	3150	ENSG00000133026	MYH10	protein_coding	myosin heavy chain 10
Chr1	1_171655670_171655870	171655671	171655870	1.39896	Promoter (2-3kb)	-2983	ENSG00000034971	MYOC	protein_coding	myocilin
Chr1	1_203084130_203084330	203084131	203084330	1.39896	Promoter (1-2kb)	1682	ENSG00000122180	MYOG	protein_coding	myogenin
Chr16	16_3469189_3469447	3469190	3469447	1.39896	Intron	-10133	ENSG00000122390	NAA60	protein_coding	N-alpha-acetyltransferase 60, NatF catalytic subunit
Chr10	10_63147435_63147635	63147436	63147635	1.39896	Intron	14108	ENSG00000148572	NRBF2	protein_coding	nuclear receptor binding factor 2
Chr15	15_76024127_76024731	76024128	76024731	1.39896	Intron	-11695	ENSG00000169752	NRG4	protein_coding	neuregulin 4
Chr14	14_31711467_31711667	31711468	31711667	1.39896	Promoter (2-3kb)	-2902	ENSG00000151413	NUBPL	protein_coding	NUBP iron-sulfur cluster assembly factor, mitochondrial
Chr1	1_248306516_248306716	248306517	248306716	1.39896	Distal Intergenic	-3093	ENSG00000177201	OR2T12	protein_coding	olfactory receptor family 2 subfamily T member 12
Chr19	19_718305_718505	718306	718505	1.39896	Promoter (<=1kb)	-595	ENSG00000099864	PALM	protein_coding	paralemmin
Chr18	18_11146600_11146878	11146601	11146878	1.39896	Promoter (1-2kb)	1710	ENSG00000154864	PIEZO2	protein_coding	piezo type mechanosensitive ion channel component 2
Chr4	4_2080332_2080552	2080333	2080552	1.39896	Promoter (<=1kb)	489	ENSG00000130997	POLN	protein_coding	DNA polymerase nu
Chr14	14_88479671_88480013	88479672	88480013	1.39896	3' UTR	-5740	ENSG00000070778	PTPN21	protein_coding	protein tyrosine phosphatase non-receptor type 21
Chr3	3_62191143_62191376	62191144	62191376	1.39896	Intron	-26207	ENSG00000144724	PTPRG	protein_coding	protein tyrosine phosphatase receptor type G
Chr12	12_116849180_116849380	116849181	116849380	1.39896	Exon	13184	ENSG00000135119	RNFT2	protein_coding	ring finger protein, transmembrane 2
Chr12	12_51269633_51269840	51269634	51269840	1.39896	Promoter (<=1kb)	72	ENSG00000170545	SMAGP	protein_coding	small cell adhesion glycoprotein
Chr6	6_35932138_35932459	35932139	35932459	1.39896	Distal Intergenic	-10797	ENSG00000096063	SRPK1	protein_coding	SRSF protein kinase 1
Chr9	9_35698748_35698948	35698749	35698948	1.39896	Promoter (<=1kb)	380	ENSG00000137076	TLN1	protein_coding	talin 1
Chr2	2_74515690_74515890	74515691	74515890	1.39896	Promoter (1-2kb)	1241	ENSG00000115297	TLX2	protein_coding	T cell leukemia homeobox 2
Chr12	12_29888707_29888907	29888708	29888907	1.39896	Distal Intergenic	-103949	ENSG00000133687	TMTC1	protein_coding	transmembrane O-mannosyltransferase targeting cadherins 1
Chr11	11_120187269_120187510	120187270	120187510	1.39896	Promoter (1-2kb)	-1741	ENSG00000137699	TRIM29	protein_coding	tripartite motif containing 29
Chr11	11_101582381_101582928	101582382	101582928	1.39896	Promoter (<=1kb)	575	ENSG00000137672	TRPC6	protein_coding	transient receptor potential cation channel subfamily C member 6
Chr1	1_32577330_32577530	32577331	32577530	1.39896	Intron	37902	ENSG00000160062	ZBTB8A	protein_coding	zinc finger and BTB domain containing 8A
Chr18	18_58919512_58919712	58919513	58919712	1.39896	Promoter (<=1kb)	-618	ENSG00000074657	ZNF532	protein_coding	zinc finger protein 532
Chr1	1_230074973_230075425	230074974	230075425	1.37039	Intron	7715	ENSG00000143641	GALNT2	protein_coding	polypeptide N-acetylgalactosaminyltransferase 2
Chr8	8_41702017_41702221	41702018	41702221	1.36654	Exon	3958	ENSG00000029534	ANK1	protein_coding	ankyrin 1
Chr10	10_124043857_124044278	124043858	124044278	1.36654	Intron	-5239	ENSG00000182022	CHST15	protein_coding	carbohydrate sulfotransferase 15
Chr3	3_5220565_5221018	5220566	5221018	1.36654	Distal Intergenic	25460	ENSG00000134109	EDEM1	protein_coding	ER degradation enhancing alpha-mannosidase like protein 1
Chr10	10_132836583_132836783	132836584	132836783	1.36149	Promoter (<=1kb)	294	ENSG00000171811	CFAP46	protein_coding	cilia and flagella associated protein 46
Chr19	19_45166665_45166865	45166666	45166865	1.36149	Intron	-5684	ENSG00000179846	NKPD1	protein_coding	NTPase KAP family P-loop domain containing 1
ChrX	X_40074978_40075220	40074979	40075220	1.35457	Promoter (2-3kb)	2709	ENSG00000183337	BCOR	protein_coding	BCL6 corepressor
Chr19	19_3429175_3429379	3429176	3429379	1.35457	Intron	-5667	ENSG00000141905	NFIC	protein_coding	nuclear factor I C
Chr3	3_38203953_38204222	38203954	38204222	1.35457	Intron	-11872	ENSG00000172939	OXSR1	protein_coding	oxidative stress responsive kinase 1
ChrX	X_68647826_68648026	68647827	68648026	1.35457	Promoter (<=1kb)	158	ENSG00000130052	STARD8	protein_coding	StAR related lipid transfer domain containing 8
Chr19	19_7074847_7075190	7074848	7075190	1.35457	5' UTR	5143	ENSG00000130544	ZNF557	protein_coding	zinc finger protein 557
ChrX	X_72267072_72267498	72267073	72267498	1.35005	Intron	5225	ENSG00000198034	RPS4X	protein_coding	ribosomal protein S4 X-linked
Chr6	6_47444156_47444445	47444157	47444445	1.34451	Distal Intergenic	-33344	ENSG00000198087	CD2AP	protein_coding	CD2 associated protein
Chr2	2_223052939_223053349	223052940	223053349	1.34451	Promoter (<=1kb)	740	ENSG00000152049	KCNE4	protein_coding	potassium voltage-gated channel subfamily E regulatory subunit 4
Chr1	1_116127378_116127716	116127379	116127716	1.34451	Exon	3506	ENSG00000173212	MAB21L3	protein_coding	mab-21 like 3
Chr12	12_104905454_104905671	104905455	104905671	1.34451	Intron	22531	ENSG00000136052	SLC41A2	protein_coding	solute carrier family 41 member 2
Chr11	11_66704727_66704927	66704728	66704927	1.34451	Exon	-5921	ENSG00000173898	SPTBN2	protein_coding	spectrin beta, non-erythrocytic 2
Chr19	19_30367787_30368137	30367788	30368137	1.34451	Intron	-4247	ENSG00000198597	ZNF536	protein_coding	zinc finger protein 536
Chr10	10_99540582_99540983	99540583	99540983	1.34007	Distal Intergenic	7641	ENSG00000119919	NKX2-3	protein_coding	NK2 homeobox 3
Chr7	7_113781557_113782220	113781558	113782220	1.33246	Distal Intergenic	136776	ENSG00000154415	PPP1R3A	protein_coding	protein phosphatase 1 regulatory subunit 3A
Chr10	10_1737020_1737220	1737021	1737220	1.32857	Promoter (<=1kb)	305	ENSG00000185736	ADARB2	protein_coding	adenosine deaminase RNA specific B2 (inactive)
Chr4	4_85910412_85910718	85910413	85910718	1.32857	Intron	-13016	ENSG00000138639	ARHGAP24	protein_coding	Rho GTPase activating protein 24
Chr10	10_122308039_122308239	122308040	122308239	1.32857	Intron	16959	ENSG00000138152	BTBD16	protein_coding	BTB domain containing 16
Chr13	13_113957395_113957595	113957396	113957595	1.32857	Intron	12814	ENSG00000283199	C13orf46	protein_coding	chromosome 13 open reading frame 46
Chr1	1_230773694_230773894	230773695	230773894	1.32857	Intron	-17983	ENSG00000135773	CAPN9	protein_coding	calpain 9
Chr12	12_82209725_82209925	82209726	82209925	1.32857	Distal Intergenic	146196	ENSG00000133773	CCDC59	protein_coding	coiled-coil domain containing 59
Chr21	21_34659974_34660243	34659975	34660243	1.32857	Distal Intergenic	-8751	ENSG00000159212	CLIC6	protein_coding	chloride intracellular channel 6
ChrX	X_118516389_118516589	118516390	118516589	1.32857	Intron	20492	ENSG00000147251	DOCK11	protein_coding	dedicator of cytokinesis 11
Chr5	5_151214239_151214439	151214240	151214439	1.32857	Promoter (2-3kb)	2090	ENSG00000196743	GM2A	protein_coding	ganglioside GM2 activator
Chr15	15_31360101_31360301	31360102	31360301	1.32857	Intron	-5853	ENSG00000169926	KLF13	protein_coding	KLF transcription factor 13
Chr2	2_11779193_11779393	11779194	11779393	1.32857	Promoter (1-2kb)	1987	ENSG00000134324	LPIN1	protein_coding	lipin 1
Chr1	1_160823438_160823638	160823439	160823638	1.32857	Exon	8916	ENSG00000122224	LY9	protein_coding	lymphocyte antigen 9
Chr1	1_30671534_30671734	30671535	30671734	1.32857	Distal Intergenic	44401	ENSG00000162510	MATN1	protein_coding	matrilin 1
ChrX	X_11787817_11788017	11787818	11788017	1.32857	Distal Intergenic	22220	ENSG00000005302	MSL3	protein_coding	MSL complex subunit 3
Chr3	3_14981466_14981666	14981467	14981666	1.32857	Intron	19058	ENSG00000177463	NR2C2	protein_coding	nuclear receptor subfamily 2 group C member 2
ChrX	X_73069150_73069350	73069151	73069350	1.32857	Distal Intergenic	10162	ENSG00000186288	PABPC1L2A	protein_coding	poly(A) binding protein cytoplasmic 1 like 2A
Chr11	11_83168792_83169001	83168793	83169001	1.32857	Promoter (2-3kb)	-2250	ENSG00000165494	PCF11	protein_coding	PCF11 cleavage and polyadenylation factor subunit
Chr19	19_33456214_33456414	33456215	33456414	1.32857	Promoter (2-3kb)	-2931	ENSG00000124299	PEPD	protein_coding	peptidase D
Chr15	15_68182390_68182608	68182391	68182608	1.32857	Promoter (1-2kb)	1180	ENSG00000033800	PIAS1	protein_coding	protein inhibitor of activated STAT 1
Chr7	7_47889934_47890134	47889935	47890134	1.32857	Intron	-52870	ENSG00000158683	PKD1L1	protein_coding	polycystin 1 like 1, transient receptor potential channel interacting
Chr3	3_16773690_16773890	16773691	16773890	1.32857	Distal Intergenic	-28761	ENSG00000154822	PLCL2	protein_coding	phospholipase C like 2
Chr12	12_79838547_79838816	79838548	79838816	1.32857	Intron	-5952	ENSG00000058272	PPP1R12A	protein_coding	protein phosphatase 1 regulatory subunit 12A
Chr6	6_150152360_150152565	150152361	150152565	1.32857	Intron	9317	ENSG00000198729	PPP1R14C	protein_coding	protein phosphatase 1 regulatory inhibitor subunit 14C
Chr16	16_57200571_57200847	57200572	57200847	1.32857	Intron	-3750	ENSG00000159579	RSPRY1	protein_coding	ring finger and SPRY domain containing 1
Chr4	4_140267524_140267724	140267525	140267724	1.32857	Intron	10239	ENSG00000153130	SCOC	protein_coding	short coiled-coil protein
Chr12	12_100431223_100431479	100431224	100431479	1.32857	Distal Intergenic	20603	ENSG00000179520	SLC17A8	protein_coding	solute carrier family 17 member 8
Chr1	1_150482084_150482284	150482085	150482284	1.32857	Distal Intergenic	-5130	ENSG00000143374	TARS2	protein_coding	threonyl-tRNA synthetase 2, mitochondrial
Chr18	18_74916183_74916406	74916184	74916406	1.32857	Intron	38979	ENSG00000215421	ZNF407	protein_coding	zinc finger protein 407
Chr17	17_63911706_63911906	63911707	63911906	1.3165	Promoter (<=1kb)	-366	ENSG00000204414	CSHL1	protein_coding	chorionic somatomammotropin hormone like 1
Chr9	9_123415420_123415620	123415421	123415620	1.3165	Intron	-11848	ENSG00000119522	DENND1A	protein_coding	DENN domain containing 1A
Chr19	19_10581323_10581552	10581324	10581552	1.3115	Exon	-4010	ENSG00000129354	AP1M2	protein_coding	adaptor related protein complex 1 subunit mu 2
Chr9	9_98767512_98767712	98767513	98767712	1.29942	Intron	9714	ENSG00000165138	ANKS6	protein_coding	ankyrin repeat and sterile alpha motif domain containing 6
Chr15	15_72736350_72736550	72736351	72736550	1.29942	Promoter (<=1kb)	834	ENSG00000140463	BBS4	protein_coding	Bardet-Biedl syndrome 4
Chr14	14_96193758_96194095	96193759	96194095	1.29942	Distal Intergenic	-10584	ENSG00000168398	BDKRB2	protein_coding	bradykinin receptor B2
Chr17	17_4979917_4980199	4979918	4980199	1.29942	Promoter (<=1kb)	-476	ENSG00000108509	CAMTA2	protein_coding	calmodulin binding transcription activator 2
Chr11	11_117443560_117443760	117443561	117443760	1.29942	Intron	32449	ENSG00000110274	CEP164	protein_coding	centrosomal protein 164
Chr11	11_68783362_68783569	68783363	68783569	1.29942	Intron	-9476	ENSG00000110090	CPT1A	protein_coding	carnitine palmitoyltransferase 1A
Chr11	11_126336809_126337009	126336810	126337009	1.29942	Promoter (<=1kb)	396	ENSG00000110063	DCPS	protein_coding	decapping enzyme, scavenger
Chr12	12_50532347_50532547	50532348	50532547	1.29942	Intron	27363	ENSG00000066084	DIP2B	protein_coding	disco interacting protein 2 homolog B
Chr12	12_123893392_123893592	123893393	123893592	1.29942	Exon	-14721	ENSG00000197653	DNAH10	protein_coding	dynein axonemal heavy chain 10
Chr8	8_66036857_66037184	66036858	66037184	1.29942	Intron	-6293	ENSG00000147570	DNAJC5B	protein_coding	DnaJ heat shock protein family (Hsp40) member C5 beta
Chr8	8_118100432_118100632	118100433	118100632	1.29942	Intron	9782	ENSG00000182197	EXT1	protein_coding	exostosin glycosyltransferase 1
Chr4	4_48675556_48675820	48675557	48675820	1.29942	Intron	5351	ENSG00000075539	FRYL	protein_coding	FRY like transcription coactivator
Chr4	4_108013233_108013433	108013234	108013433	1.29942	Intron	3445	ENSG00000138796	HADH	protein_coding	hydroxyacyl-CoA dehydrogenase
Chr7	7_43467799_43467999	43467800	43467999	1.29942	Intron	-11609	ENSG00000002746	HECW1	protein_coding	HECT, C2 and WW domain containing E3 ubiquitin protein ligase 1
Chr11	11_2964424_2964624	2964425	2964624	1.29942	Promoter (<=1kb)	88	ENSG00000205531	NAP1L4	protein_coding	nucleosome assembly protein 1 like 4
Chr1	1_153688382_153688582	153688383	153688582	1.29942	Promoter (<=1kb)	-142	ENSG00000169418	NPR1	protein_coding	natriuretic peptide receptor 1
Chr9	9_34337620_34338061	34337621	34338061	1.29942	Intron	8052	ENSG00000164978	NUDT2	protein_coding	nudix hydrolase 2
Chr5	5_132234159_132234359	132234160	132234359	1.29942	Intron	-5902	ENSG00000072682	P4HA2	protein_coding	prolyl 4-hydroxylase subunit alpha 2
Chr18	18_80200903_80201103	80200904	80201103	1.29942	Promoter (1-2kb)	1778	ENSG00000178184	PARD6G	protein_coding	par-6 family cell polarity regulator gamma
ChrX	X_24554553_24554753	24554554	24554753	1.29942	Distal Intergenic	29157	ENSG00000067992	PDK3	protein_coding	pyruvate dehydrogenase kinase 3
Chr6	6_143756344_143756544	143756345	143756544	1.29942	Intron	7417	ENSG00000112419	PHACTR2	protein_coding	phosphatase and actin regulator 2
Chr10	10_70862420_70862620	70862421	70862620	1.29942	Intron	-3654	ENSG00000166224	SGPL1	protein_coding	sphingosine-1-phosphate lyase 1
Chr3	3_173010116_173010534	173010117	173010534	1.29942	Intron	-33065	ENSG00000144962	SPATA16	protein_coding	spermatogenesis associated 16
Chr9	9_61173206_61173406	61173207	61173406	1.29942	Distal Intergenic	-16630	ENSG00000276040	SPATA31A7	protein_coding	SPATA31 subfamily A member 7
Chr14	14_34444455_34444655	34444456	34444655	1.29942	Intron	17585	ENSG00000165389	SPTSSA	protein_coding	serine palmitoyltransferase small subunit A
Chr4	4_182455670_182455870	182455671	182455870	1.29942	Intron	6672	ENSG00000218336	TENM3	protein_coding	teneurin transmembrane protein 3
Chr6	6_54295368_54295568	54295369	54295568	1.29942	Distal Intergenic	-12291	ENSG00000137251	TINAG	protein_coding	tubulointerstitial nephritis antigen
Chr4	4_69664404_69664604	69664405	69664604	1.29942	Distal Intergenic	-11156	ENSG00000173610	UGT2A1	protein_coding	UDP glucuronosyltransferase family 2 member A1 complex locus
ChrX	X_2804342_2804841	2804343	2804841	1.29942	Intron	9808	ENSG00000124343	XG	protein_coding	Xg glycoprotein (Xg blood group)
Chr19	19_49958998_49959461	49958999	49959461	1.29044	Promoter (<=1kb)	-541	ENSG00000161640	SIGLEC11	protein_coding	sialic acid binding Ig like lectin 11
Chr3	3_48933207_48933466	48933208	48933466	1.28348	Intron	5429	ENSG00000177479	ARIH2	protein_coding	ariadne RBR E3 ubiquitin protein ligase 2
Chr4	4_107035135_107035335	107035136	107035335	1.28348	Promoter (<=1kb)	477	ENSG00000155011	DKK2	protein_coding	dickkopf WNT signaling pathway inhibitor 2
Chr12	12_120358660_120358860	120358661	120358860	1.28348	Promoter (2-3kb)	2648	ENSG00000135097	MSI1	protein_coding	musashi RNA binding protein 1
Chr1	1_198314989_198315428	198314990	198315428	1.28348	Intron	37286	ENSG00000151414	NEK7	protein_coding	NIMA related kinase 7
Chr4	4_2478597_2478967	2478598	2478967	1.28348	Promoter (<=1kb)	-886	ENSG00000063978	RNF4	protein_coding	ring finger protein 4
Chr3	3_105353678_105353878	105353679	105353878	1.27343	Distal Intergenic	-13031	ENSG00000170017	ALCAM	protein_coding	activated leukocyte cell adhesion molecule
Chr2	2_236252604_236252877	236252605	236252877	1.27343	Promoter (1-2kb)	1294	ENSG00000182177	ASB18	protein_coding	ankyrin repeat and SOCS box containing 18
Chr19	19_32879666_32879866	32879667	32879866	1.27343	Promoter (1-2kb)	-1246	ENSG00000121289	CEP89	protein_coding	centrosomal protein 89
Chr11	11_85671692_85671987	85671693	85671987	1.27343	Intron	-6564	ENSG00000137504	CREBZF	protein_coding	CREB/ATF bZIP transcription factor
ChrX	X_9316853_9317091	9316854	9317091	1.27343	Distal Intergenic	-21172	ENSG00000177138	FAM9B	protein_coding	family with sequence similarity 9 member B
Chr3	3_14829242_14829442	14829243	14829442	1.27343	Intron	7811	ENSG00000154783	FGD5	protein_coding	FYVE, RhoGEF and PH domain containing 5
Chr1	1_236582159_236582359	236582160	236582359	1.27343	Intron	-7385	ENSG00000119285	HEATR1	protein_coding	HEAT repeat containing 1
Chr6	6_136240794_136240994	136240795	136240994	1.27343	Promoter (1-2kb)	-1249	ENSG00000146410	MTFR2	protein_coding	mitochondrial fission regulator 2
Chr5	5_16718050_16718250	16718051	16718250	1.27343	Intron	-4583	ENSG00000145555	MYO10	protein_coding	myosin X
Chr12	12_5432476_5432676	5432477	5432676	1.27343	Promoter (<=1kb)	365	ENSG00000185652	NTF3	protein_coding	neurotrophin 3
Chr9	9_137533094_137533364	137533095	137533364	1.27343	Intron	14010	ENSG00000130653	PNPLA7	protein_coding	patatin like phospholipase domain containing 7
Chr1	1_227869625_227870109	227869626	227870109	1.27343	Distal Intergenic	53951	ENSG00000185888	PRSS38	protein_coding	serine protease 38
Chr20	20_431609_431809	431610	431809	1.27343	3' UTR	4740	ENSG00000125826	RBCK1	protein_coding	RANBP2-type and C3HC4-type zinc finger containing 1
ChrX	X_9593628_9593901	9593629	9593901	1.27343	Intron	33164	ENSG00000101849	TBL1X	protein_coding	transducin beta like 1 X-linked
Chr7	7_45124329_45124529	45124330	45124529	1.27343	Distal Intergenic	-12283	ENSG00000136270	TBRG4	protein_coding	transforming growth factor beta regulator 4
Chr11	11_62745151_62745351	62745152	62745351	1.27343	Downstream (2-3kb)	5204	ENSG00000162222	TTC9C	protein_coding	tetratricopeptide repeat domain 9C
Chr17	17_50830839_50831118	50830840	50831118	1.27343	Distal Intergenic	-3532	ENSG00000173714	WFIKKN2	protein_coding	WAP, follistatin/kazal, immunoglobulin, kunitz and netrin domain containing 2
Chr19	19_52963340_52963540	52963341	52963540	1.27343	Promoter (<=1kb)	-430	ENSG00000180257	ZNF816	protein_coding	zinc finger protein 816
Chr7	7_73841684_73841884	73841685	73841884	1.26651	Promoter (<=1kb)	632	ENSG00000165171	METTL27	protein_coding	methyltransferase like 27
Chr2	2_70922403_70922776	70922404	70922776	1.26651	Promoter (1-2kb)	1197	ENSG00000116035	VAX2	protein_coding	ventral anterior homeobox 2
Chr9	9_127122867_127123112	127122868	127123112	1.26146	Promoter (<=1kb)	-233	ENSG00000136859	ANGPTL2	protein_coding	angiopoietin like 2
Chr11	11_77041283_77041483	77041284	77041483	1.26146	3' UTR	6886	ENSG00000198488	B3GNT6	protein_coding	UDP-GlcNAc:betaGal beta-1,3-N-acetylglucosaminyltransferase 6
Chr11	11_47595139_47595377	47595140	47595377	1.26146	Promoter (<=1kb)	-729	ENSG00000172247	C1QTNF4	protein_coding	C1q and TNF related 4
Chr3	3_126557619_126557819	126557620	126557819	1.26146	Promoter (1-2kb)	1113	ENSG00000180697	C3orf22	protein_coding	chromosome 3 open reading frame 22
Chr14	14_94128419_94128706	94128420	94128706	1.26146	Promoter (<=1kb)	271	ENSG00000119632	IFI27L2	protein_coding	interferon alpha inducible protein 27 like 2
Chr12	12_48857515_48857726	48857516	48857726	1.26146	Promoter (1-2kb)	1556	ENSG00000172602	RND1	protein_coding	Rho family GTPase 1
Chr6	6_136921554_136921759	136921555	136921759	1.26146	Promoter (<=1kb)	-542	ENSG00000182747	SLC35D3	protein_coding	solute carrier family 35 member D3
Chr16	16_89522670_89522899	89522671	89522899	1.26146	Promoter (<=1kb)	472	ENSG00000197912	SPG7	protein_coding	SPG7 matrix AAA peptidase subunit, paraplegin
Chr10	10_13259246_13259460	13259247	13259460	1.26146	Distal Intergenic	-24873	ENSG00000165623	UCMA	protein_coding	upper zone of growth plate and cartilage matrix associated
Chr8	8_54453758_54454078	54453759	54454078	1.25457	Distal Intergenic	-3857	ENSG00000164736	SOX17	protein_coding	SRY-box transcription factor 17
Chr1	1_155983512_155983845	155983513	155983845	1.24463	Intron	-4400	ENSG00000116584	ARHGEF2	protein_coding	Rho/Rac guanine nucleotide exchange factor 2
Chr11	11_125705200_125705400	125705201	125705400	1.22903	Distal Intergenic	-24327	ENSG00000134940	ACRV1	protein_coding	acrosomal vesicle protein 1
Chr11	11_46679762_46679962	46679763	46679962	1.22903	Promoter (1-2kb)	1554	ENSG00000175220	ARHGAP1	protein_coding	Rho GTPase activating protein 1
Chr1	1_181425211_181425411	181425212	181425411	1.22903	Intron	-57443	ENSG00000198216	CACNA1E	protein_coding	calcium voltage-gated channel subunit alpha1 E
Chr11	11_15034873_15035156	15034874	15035156	1.22903	Intron	-38406	ENSG00000175868	CALCB	protein_coding	calcitonin related polypeptide beta
Chr2	2_158278329_158278529	158278330	158278529	1.22903	Intron	102431	ENSG00000153237	CCDC148	protein_coding	coiled-coil domain containing 148
Chr2	2_100410227_100410542	100410228	100410542	1.22903	Intron	5303	ENSG00000115526	CHST10	protein_coding	carbohydrate sulfotransferase 10
Chr15	15_78331112_78331382	78331113	78331382	1.22903	Distal Intergenic	-8971	ENSG00000166426	CRABP1	protein_coding	cellular retinoic acid binding protein 1
Chr7	7_30660361_30660571	30660362	30660571	1.22903	Intron	21885	ENSG00000106113	CRHR2	protein_coding	corticotropin releasing hormone receptor 2
Chr15	15_22980572_22980798	22980573	22980798	1.22903	Promoter (<=1kb)	-191	ENSG00000273749	CYFIP1	protein_coding	cytoplasmic FMR1 interacting protein 1
Chr5	5_53482730_53482930	53482731	53482930	1.22903	Promoter (<=1kb)	37	ENSG00000134363	FST	protein_coding	follistatin
Chr15	15_34752842_34753042	34752843	34753042	1.22903	Promoter (1-2kb)	1956	ENSG00000159248	GJD2	protein_coding	gap junction protein delta 2
Chr8	8_30650361_30650561	30650362	30650561	1.22903	Intron	6444	ENSG00000197265	GTF2E2	protein_coding	general transcription factor IIE subunit 2
ChrX	X_104013194_104013394	104013195	104013394	1.22903	Promoter (<=1kb)	314	ENSG00000123569	H2BW1	protein_coding	H2B.W histone 1
Chr7	7_35686892_35687092	35686893	35687092	1.22903	Intron	7474	ENSG00000122557	HERPUD2	protein_coding	HERPUD family member 2
Chr1	1_220984306_220984506	220984307	220984506	1.22903	Distal Intergenic	103238	ENSG00000136630	HLX	protein_coding	H2.0 like homeobox
Chr17	17_48522051_48522251	48522052	48522251	1.22903	Distal Intergenic	8659	ENSG00000120094	HOXB1	protein_coding	homeobox B1
ChrX	X_149568005_149568205	149568006	149568205	1.22903	Distal Intergenic	-18082	ENSG00000283697	HSFX3	protein_coding	heat shock transcription factor family, X-linked member 3
Chr12	12_52927507_52927707	52927508	52927707	1.22903	Promoter (1-2kb)	-1039	ENSG00000170421	KRT8	protein_coding	keratin 8
Chr8	8_142702833_142703033	142702834	142703033	1.22903	Promoter (1-2kb)	1235	ENSG00000160886	LY6K	protein_coding	lymphocyte antigen 6 family member K
Chr11	11_12159918_12160147	12159919	12160147	1.22903	Promoter (1-2kb)	-1296	ENSG00000133816	MICAL2	protein_coding	microtubule associated monooxygenase, calponin and LIM domain containing 2
Chr17	17_4842986_4843186	4842987	4843186	1.22903	Intron	9366	ENSG00000141503	MINK1	protein_coding	misshapen like kinase 1
Chr8	8_17765061_17765261	17765062	17765261	1.22903	Intron	5320	ENSG00000129422	MTUS1	protein_coding	microtubule associated scaffold protein 1
Chr21	21_28848825_28849025	28848826	28849025	1.22903	Distal Intergenic	36342	ENSG00000156239	N6AMT1	protein_coding	N-6 adenine-specific DNA methyltransferase 1
Chr11	11_34139496_34139696	34139497	34139696	1.22903	Promoter (<=1kb)	625	ENSG00000135372	NAT10	protein_coding	N-acetyltransferase 10
Chr2	2_60804475_60804675	60804476	60804675	1.22903	Distal Intergenic	12995	ENSG00000115421	PAPOLG	protein_coding	poly(A) polymerase gamma
Chr4	4_94452641_94452861	94452642	94452861	1.22903	Promoter (<=1kb)	686	ENSG00000163110	PDLIM5	protein_coding	PDZ and LIM domain 5
Chr8	8_70057015_70057215	70057016	70057215	1.22903	Intron	14037	ENSG00000147596	PRDM14	protein_coding	PR/SET domain 14
ChrX	X_23688551_23688751	23688552	23688751	1.22903	Distal Intergenic	13553	ENSG00000123131	PRDX4	protein_coding	peroxiredoxin 4
ChrX	X_153272675_153273000	153272676	153273000	1.22903	Exon	6524	ENSG00000278803	PWWP4	protein_coding	PWWP domain containing 4
ChrX	X_132278116_132278316	132278117	132278316	1.22903	Intron	-58637	ENSG00000123728	RAP2C	protein_coding	RAP2C, member of RAS oncogene family
Chr17	17_42585065_42585265	42585066	42585265	1.22903	Promoter (1-2kb)	1167	ENSG00000141699	RETREG3	protein_coding	reticulophagy regulator family member 3
Chr8	8_118668337_118668537	118668338	118668537	1.22903	Exon	-46226	ENSG00000177570	SAMD12	protein_coding	sterile alpha motif domain containing 12
Chr2	2_238080659_238080859	238080660	238080859	1.22903	Promoter (<=1kb)	-876	ENSG00000132330	SCLY	protein_coding	selenocysteine lyase
Chr11	11_9074357_9074557	9074358	9074557	1.22903	Exon	-7608	ENSG00000175356	SCUBE2	protein_coding	signal peptide, CUB domain and EGF like domain containing 2
Chr3	3_123008841_123009041	123008842	123009041	1.22903	Intron	-15569	ENSG00000082684	SEMA5B	protein_coding	semaphorin 5B
Chr1	1_31262384_31262584	31262385	31262584	1.22903	Promoter (<=1kb)	-563	ENSG00000060688	SNRNP40	protein_coding	small nuclear ribonucleoprotein U5 subunit 40
Chr3	3_57029080_57029280	57029081	57029280	1.22903	Intron	-31384	ENSG00000186451	SPATA12	protein_coding	spermatogenesis associated 12
Chr2	2_94871010_94871277	94871011	94871277	1.22903	Promoter (<=1kb)	-153	ENSG00000163060	TEKT4	protein_coding	tektin 4
Chr12	12_117084530_117084730	117084531	117084730	1.22903	Intron	13925	ENSG00000088992	TESC	protein_coding	tescalcin
Chr19	19_43415872_43416072	43415873	43416072	1.22903	Promoter (<=1kb)	983	ENSG00000131126	TEX101	protein_coding	testis expressed 101
Chr4	4_165126297_165126497	165126298	165126497	1.22903	Intron	-13438	ENSG00000170088	TMEM192	protein_coding	transmembrane protein 192
Chr8	8_115370424_115370833	115370425	115370833	1.22903	Distal Intergenic	121388	ENSG00000104447	TRPS1	protein_coding	transcriptional repressor GATA binding 1
Chr9	9_35174848_35175048	35174849	35175048	1.22903	Intron	12745	ENSG00000198722	UNC13B	protein_coding	unc-13 homolog B
Chr2	2_209751699_209751899	209751700	209751899	1.22903	Distal Intergenic	-19933	ENSG00000144406	UNC80	protein_coding	unc-80 homolog, NALCN channel complex subunit
Chr17	17_646043_646356	646044	646356	1.22903	Intron	9508	ENSG00000141252	VPS53	protein_coding	VPS53 subunit of GARP complex
Chr17	17_39868326_39868526	39868327	39868526	1.22903	Promoter (<=1kb)	111	ENSG00000186075	ZPBP2	protein_coding	zona pellucida binding protein 2
Chr19	19_18895116_18895316	18895117	18895316	1.21255	Promoter (<=1kb)	819	ENSG00000223802	CERS1	protein_coding	ceramide synthase 1
Chr21	21_42338199_42338708	42338200	42338708	1.21255	Distal Intergenic	12286	ENSG00000160181	TFF2	protein_coding	trefoil factor 2
Chr15	15_73739068_73739374	73739069	73739374	1.20993	Promoter (1-2kb)	1241	ENSG00000205363	INSYN1	protein_coding	inhibitory synaptic factor 1
Chr16	16_28902930_28903258	28902931	28903258	1.20631	Promoter (<=1kb)	-115	ENSG00000196296	ATP2A1	protein_coding	ATPase sarcoplasmic/endoplasmic reticulum Ca2+ transporting 1
ChrX	X_72559170_72559502	72559171	72559502	1.20631	Intron	8520	ENSG00000147099	HDAC8	protein_coding	histone deacetylase 8
Chr2	2_127418625_127418863	127418626	127418863	1.20631	Promoter (<=1kb)	187	ENSG00000115718	PROC	protein_coding	protein C, inactivator of coagulation factors Va and VIIIa
Chr6	6_166750343_166750571	166750344	166750571	1.20631	Intron	7340	ENSG00000071242	RPS6KA2	protein_coding	ribosomal protein S6 kinase A2
Chr9	9_114070464_114070718	114070465	114070718	1.20102	Intron	4251	ENSG00000106927	AMBP	protein_coding	alpha-1-microglobulin/bikunin precursor
Chr1	1_202143472_202143672	202143473	202143672	1.20102	Promoter (1-2kb)	1065	ENSG00000143862	ARL8A	protein_coding	ADP ribosylation factor like GTPase 8A
Chr15	15_25669929_25670171	25669930	25670171	1.20102	Distal Intergenic	14398	ENSG00000206190	ATP10A	protein_coding	ATPase phospholipid transporting 10A (putative)
Chr17	17_63872257_63872588	63872258	63872588	1.20102	Promoter (1-2kb)	1088	ENSG00000213218	CSH2	protein_coding	chorionic somatomammotropin hormone 2
Chr7	7_99543295_99543556	99543296	99543556	1.20102	Downstream (2-3kb)	8558	ENSG00000221909	FAM200A	protein_coding	family with sequence similarity 200 member A
Chr21	21_33858238_33858438	33858239	33858438	1.20102	Promoter (<=1kb)	-259	ENSG00000205726	ITSN1	protein_coding	intersectin 1
Chr1	1_154897283_154897557	154897284	154897557	1.20102	Distal Intergenic	-27003	ENSG00000143603	KCNN3	protein_coding	potassium calcium-activated channel subfamily N member 3
Chr1	1_115828261_115828643	115828262	115828643	1.20102	Distal Intergenic	12098	ENSG00000177551	NHLH2	protein_coding	nescient helix-loop-helix 2
Chr6	6_3239405_3239707	3239406	3239707	1.20102	Intron	7577	ENSG00000180822	PSMG4	protein_coding	proteasome assembly chaperone 4
Chr17	17_1072698_1072898	1072699	1072898	1.19251	Promoter (2-3kb)	-2716	ENSG00000159842	ABR	protein_coding	ABR activator of RhoGEF and GTPase
Chr3	3_138299849_138300049	138299850	138300049	1.19251	Intron	10829	ENSG00000114098	ARMC8	protein_coding	armadillo repeat containing 8
Chr8	8_130491311_130491680	130491312	130491680	1.19251	Distal Intergenic	-47638	ENSG00000153317	ASAP1	protein_coding	ArfGAP with SH3 domain, ankyrin repeat and PH domain 1
Chr18	18_23156063_23156263	23156064	23156263	1.19251	Promoter (<=1kb)	239	ENSG00000134508	CABLES1	protein_coding	Cdk5 and Abl enzyme substrate 1
Chr7	7_101363406_101363609	101363407	101363609	1.19251	Promoter (<=1kb)	530	ENSG00000160963	COL26A1	protein_coding	collagen type XXVI alpha 1 chain
Chr11	11_66491214_66491527	66491215	66491527	1.19251	Promoter (<=1kb)	-78	ENSG00000254986	DPP3	protein_coding	dipeptidyl peptidase 3
Chr9	9_100068099_100068299	100068100	100068299	1.19251	Intron	-7945	ENSG00000023318	ERP44	protein_coding	endoplasmic reticulum protein 44
Chr1	1_32144822_32145022	32144823	32145022	1.19251	Promoter (1-2kb)	1900	ENSG00000025800	KPNA6	protein_coding	karyopherin subunit alpha 6
Chr15	15_42142381_42142601	42142382	42142601	1.19251	Promoter (2-3kb)	2986	ENSG00000168907	PLA2G4F	protein_coding	phospholipase A2 group IVF
Chr16	16_23836275_23836475	23836276	23836475	1.19251	Promoter (<=1kb)	47	ENSG00000166501	PRKCB	protein_coding	protein kinase C beta
Chr19	19_15469193_15469393	15469194	15469393	1.19251	3' UTR	-4650	ENSG00000105122	RASAL3	protein_coding	RAS protein activator like 3
Chr4	4_81429850_81430232	81429851	81430232	1.19251	Intron	27370	ENSG00000138670	RASGEF1B	protein_coding	RasGEF domain family member 1B
Chr1	1_70241940_70242376	70241941	70242376	1.19251	Intron	-4354	ENSG00000116754	SRSF11	protein_coding	serine and arginine rich splicing factor 11
Chr19	19_3210563_3211032	3210564	3211032	1.18951	Distal Intergenic	3098	ENSG00000125912	NCLN	protein_coding	nicalin
Chr20	20_32521791_32522276	32521792	32522276	1.18839	Promoter (<=1kb)	-938	ENSG00000197183	NOL4L	protein_coding	nucleolar protein 4 like
Chr7	7_151350090_151350562	151350091	151350562	1.18839	Promoter (<=1kb)	-558	ENSG00000013374	NUB1	protein_coding	negative regulator of ubiquitin like proteins 1
Chr9	9_128233633_128234171	128233634	128234171	1.18597	Promoter (<=1kb)	70	ENSG00000106976	DNM1	protein_coding	dynamin 1
Chr19	19_45341499_45341699	45341500	45341699	1.18597	Promoter (<=1kb)	726	ENSG00000104892	KLC3	protein_coding	kinesin light chain 3
Chr11	11_64810007_64810284	64810008	64810284	1.18173	Promoter (<=1kb)	-147	ENSG00000133895	MEN1	protein_coding	menin 1
Chr12	12_460587_460827	460588	460827	1.17657	Promoter (<=1kb)	118	ENSG00000139044	B4GALNT3	protein_coding	beta-1,4-N-acetyl-galactosaminyltransferase 3
Chr12	12_28200874_28201074	28200875	28201074	1.17657	Intron	9630	ENSG00000123106	CCDC91	protein_coding	coiled-coil domain containing 91
Chr11	11_118315457_118315657	118315458	118315657	1.17657	3' UTR	3314	ENSG00000198851	CD3E	protein_coding	CD3 epsilon subunit of T-cell receptor complex
Chr5	5_150743321_150743617	150743322	150743617	1.17657	Promoter (<=1kb)	-163	ENSG00000132912	DCTN4	protein_coding	dynactin subunit 4
Chr1	1_66752656_66753081	66752657	66753081	1.17657	Promoter (<=1kb)	125	ENSG00000152760	DYNLT5	protein_coding	dynein light chain Tctex-type family member 5
Chr4	4_184144196_184144421	184144197	184144421	1.17657	Intron	-26376	ENSG00000164303	ENPP6	protein_coding	ectonucleotide pyrophosphatase/phosphodiesterase 6
Chr2	2_120156386_120156586	120156387	120156586	1.17657	Intron	-3981	ENSG00000115109	EPB41L5	protein_coding	erythrocyte membrane protein band 4.1 like 5
Chr4	4_88919603_88919803	88919604	88919803	1.17657	Intron	16619	ENSG00000138640	FAM13A	protein_coding	family with sequence similarity 13 member A
Chr8	8_100145473_100145673	100145474	100145673	1.17657	Promoter (<=1kb)	-33	ENSG00000156509	FBXO43	protein_coding	F-box protein 43
Chr6	6_32521707_32522145	32521708	32522145	1.17657	Exon	8142	ENSG00000198502	HLA-DRB5	protein_coding	major histocompatibility complex, class II, DR beta 5
Chr2	2_102152222_102152422	102152223	102152422	1.17657	Promoter (1-2kb)	-1527	ENSG00000115594	IL1R1	protein_coding	interleukin 1 receptor type 1
Chr7	7_156776885_156777085	156776886	156777085	1.17657	Intron	-13709	ENSG00000105983	LMBR1	protein_coding	limb development membrane protein 1
Chr2	2_20012426_20012626	20012427	20012626	1.17657	Promoter (<=1kb)	39	ENSG00000132031	MATN3	protein_coding	matrilin 3
Chr2	2_24483826_24484026	24483827	24484026	1.17657	Distal Intergenic	-7228	ENSG00000084676	NCOA1	protein_coding	nuclear receptor coactivator 1
Chr11	11_60020500_60020700	60020501	60020700	1.17657	Promoter (1-2kb)	-1367	ENSG00000255393	OOSP4B	protein_coding	oocyte secreted protein family member 4B
Chr1	1_213064909_213065109	213064910	213065109	1.17657	Intron	-7829	ENSG00000136643	RPS6KC1	protein_coding	ribosomal protein S6 kinase C1
Chr7	7_84447930_84448130	84447931	84448130	1.17657	Intron	44419	ENSG00000075213	SEMA3A	protein_coding	semaphorin 3A
Chr5	5_55613364_55613766	55613365	55613766	1.17657	Distal Intergenic	32102	ENSG00000177058	SLC38A9	protein_coding	solute carrier family 38 member 9
Chr13	13_36318688_36318888	36318689	36318888	1.17657	Intron	-4248	ENSG00000133104	SPART	protein_coding	spartin
Chr1	1_172596821_172597021	172596822	172597021	1.17657	Intron	-5128	ENSG00000094975	SUCO	protein_coding	SUN domain containing ossification factor
Chr7	7_66920940_66921206	66920941	66921206	1.17657	Promoter (<=1kb)	-19	ENSG00000106609	TMEM248	protein_coding	transmembrane protein 248
Chr3	3_119179482_119179682	119179483	119179682	1.17657	Intron	5883	ENSG00000114638	UPK1B	protein_coding	uroplakin 1B
Chr17	17_9728073_9728355	9728074	9728355	1.17657	Exon	26959	ENSG00000154914	USP43	protein_coding	ubiquitin specific peptidase 43
Chr9	9_113950521_113950721	113950522	113950721	1.17657	Intron	74140	ENSG00000157657	ZNF618	protein_coding	zinc finger protein 618
Chr17	17_77288686_77288886	77288687	77288886	1.16763	Promoter (<=1kb)	738	ENSG00000184640	SEPTIN9	protein_coding	septin 9
Chr1	1_109498151_109498523	109498152	109498523	1.16547	3' UTR	4037	ENSG00000174151	CYB561D1	protein_coding	cytochrome b561 family member D1
Chr11	11_76973344_76973687	76973345	76973687	1.16192	Promoter (2-3kb)	-2617	ENSG00000078124	ACER3	protein_coding	alkaline ceramidase 3
Chr1	1_21217427_21217627	21217428	21217627	1.16192	3' UTR	4454	ENSG00000117298	ECE1	protein_coding	endothelin converting enzyme 1
Chr11	11_67250493_67250693	67250494	67250693	1.16192	Promoter (1-2kb)	-1645	ENSG00000173120	KDM2A	protein_coding	lysine demethylase 2A
Chr19	19_17883746_17884098	17883747	17884098	1.16192	Promoter (1-2kb)	1768	ENSG00000105641	SLC5A5	protein_coding	solute carrier family 5 member 5
Chr10	10_69398676_69399059	69398677	69399059	1.15503	3' UTR	10223	ENSG00000075073	TACR2	protein_coding	tachykinin receptor 2
Chr2	2_128261669_128261987	128261670	128261987	1.15103	Intron	28209	ENSG00000136720	HS6ST1	protein_coding	heparan sulfate 6-O-sulfotransferase 1
Chr12	12_47773663_47773926	47773664	47773926	1.15103	Promoter (<=1kb)	426	ENSG00000211584	SLC48A1	protein_coding	solute carrier family 48 member 1
Chr11	11_76210228_76210626	76210229	76210626	1.1496	Promoter (<=1kb)	104	ENSG00000085741	WNT11	protein_coding	Wnt family member 11
Chr4	4_1685490_1685695	1685491	1685695	1.14842	Promoter (1-2kb)	-1178	ENSG00000174137	FAM53A	protein_coding	family with sequence similarity 53 member A
Chr9	9_128892432_128892873	128892433	128892873	1.14842	Intron	7438	ENSG00000136802	LRRC8A	protein_coding	leucine rich repeat containing 8 VRAC subunit A
Chr11	11_67391081_67391514	67391082	67391514	1.14205	Promoter (<=1kb)	-191	ENSG00000172613	RAD9A	protein_coding	RAD9 checkpoint clamp component A
Chr20	20_4232265_4232465	4232266	4232465	1.13593	Intron	-9885	ENSG00000171873	ADRA1D	protein_coding	adrenoceptor alpha 1D
Chr2	2_206214381_206214581	206214382	206214581	1.13593	Promoter (<=1kb)	-638	ENSG00000183671	CMKLR2	protein_coding	chemerin chemokine-like receptor 2
Chr18	18_31504627_31504827	31504628	31504827	1.13593	Intron	6384	ENSG00000046604	DSG2	protein_coding	desmoglein 2
Chr18	18_49080360_49080680	49080361	49080680	1.13593	Intron	16813	ENSG00000141627	DYM	protein_coding	dymeclin
Chr5	5_50464988_50465381	50464989	50465381	1.13593	Distal Intergenic	-21741	ENSG00000170571	EMB	protein_coding	embigin
Chr2	2_148678266_148678686	148678267	148678686	1.13593	Intron	-11528	ENSG00000135999	EPC2	protein_coding	enhancer of polycomb homolog 2
Chr12	12_15874512_15874727	15874513	15874727	1.13593	Intron	6471	ENSG00000151491	EPS8	protein_coding	EGFR pathway substrate 8, signaling adaptor
Chr2	2_36571584_36571903	36571585	36571903	1.13593	Intron	6929	ENSG00000171055	FEZ2	protein_coding	fasciculation and elongation protein zeta 2
Chr18	18_32332073_32332313	32332074	32332313	1.13593	Promoter (<=1kb)	-404	ENSG00000141441	GAREM1	protein_coding	GRB2 associated regulator of MAPK1 subtype 1
Chr7	7_41865101_41865301	41865102	41865301	1.13593	Distal Intergenic	112621	ENSG00000106571	GLI3	protein_coding	GLI family zinc finger 3
Chr4	4_3021224_3021424	3021225	3021424	1.13593	Promoter (<=1kb)	-988	ENSG00000125388	GRK4	protein_coding	G protein-coupled receptor kinase 4
Chr6	6_135035101_135035301	135035102	135035301	1.13593	Intron	-7906	ENSG00000112339	HBS1L	protein_coding	HBS1 like translational GTPase
Chr2	2_46904333_46904548	46904334	46904548	1.13593	3' UTR	4524	ENSG00000180398	MCFD2	protein_coding	multiple coagulation factor deficiency 2, ER cargo receptor complex subunit
Chr1	1_45508887_45509201	45508888	45509201	1.13593	Promoter (<=1kb)	-232	ENSG00000132763	MMACHC	protein_coding	metabolism of cobalamin associated C
Chr17	17_36608735_36608935	36608736	36608935	1.13593	3' UTR	6774	ENSG00000278619	MRM1	protein_coding	mitochondrial rRNA methyltransferase 1
Chr1	1_148607403_148607603	148607404	148607603	1.13593	5' UTR	-11393	ENSG00000270629	NBPF14	protein_coding	NBPF member 14
ChrX	X_17376443_17376828	17376444	17376828	1.13593	Promoter (1-2kb)	1024	ENSG00000188158	NHS	protein_coding	NHS actin remodeling regulator
Chr6	6_117740048_117740248	117740049	117740248	1.13593	Distal Intergenic	64580	ENSG00000153989	NUS1	protein_coding	NUS1 dehydrodolichyl diphosphate synthase subunit
Chr11	11_123979337_123979537	123979338	123979537	1.13593	Promoter (1-2kb)	-1557	ENSG00000196248	OR10S1	protein_coding	olfactory receptor family 10 subfamily S member 1
Chr4	4_4227014_4227329	4227015	4227329	1.13593	Promoter (<=1kb)	-86	ENSG00000163982	OTOP1	protein_coding	otopetrin 1
Chr9	9_36940502_36940702	36940503	36940702	1.13593	Intron	25887	ENSG00000196092	PAX5	protein_coding	paired box 5
Chr12	12_113348763_113348963	113348764	113348963	1.13593	Intron	-9603	ENSG00000151176	PLBD2	protein_coding	phospholipase B domain containing 2
Chr11	11_7617116_7617316	7617117	7617316	1.13593	Exon	-8495	ENSG00000166387	PPFIBP2	protein_coding	PPFIA binding protein 2
Chr6	6_57311178_57311512	57311179	57311512	1.13593	Distal Intergenic	-3293	ENSG00000146143	PRIM2	protein_coding	DNA primase subunit 2
Chr18	18_75189694_75189960	75189695	75189960	1.13593	Distal Intergenic	15553	ENSG00000180011	PTGR3	protein_coding	prostaglandin reductase 3
Chr10	10_44950524_44950724	44950525	44950724	1.13593	Intron	-8683	ENSG00000107551	RASSF4	protein_coding	Ras association domain family member 4
Chr17	17_32298150_32298350	32298151	32298350	1.13593	3' UTR	13999	ENSG00000141314	RHBDL3	protein_coding	rhomboid like 3
Chr5	5_128201478_128201678	128201479	128201678	1.13593	Distal Intergenic	23099	ENSG00000064651	SLC12A2	protein_coding	solute carrier family 12 member 2
Chr1	1_67067662_67067957	67067663	67067957	1.13593	Distal Intergenic	-13515	ENSG00000116704	SLC35D1	protein_coding	solute carrier family 35 member D1
Chr5	5_171798542_171798742	171798543	171798742	1.13593	Distal Intergenic	12677	ENSG00000185662	SMIM23	protein_coding	small integral membrane protein 23
Chr17	17_20016605_20016805	20016606	20016805	1.13593	Promoter (<=1kb)	-340	ENSG00000128487	SPECC1	protein_coding	sperm antigen with calponin homology and coiled-coil domains 1
Chr1	1_224463737_224463937	224463738	224463937	1.13593	Intron	-26705	ENSG00000162923	WDR26	protein_coding	WD repeat domain 26
Chr1	1_27306917_27307117	27306918	27307117	1.13593	Promoter (1-2kb)	1904	ENSG00000142784	WDTC1	protein_coding	WD and tetratricopeptide repeats 1
Chr19	19_52821187_52821387	52821188	52821387	1.13593	Promoter (<=1kb)	246	ENSG00000198538	ZNF28	protein_coding	zinc finger protein 28
Chr16	16_49855524_49855878	49855525	49855878	1.13593	Promoter (<=1kb)	234	ENSG00000102935	ZNF423	protein_coding	zinc finger protein 423
Chr11	11_65110655_65110855	65110656	65110855	1.13002	Promoter (<=1kb)	174	ENSG00000149823	VPS51	protein_coding	VPS51 subunit of GARP complex
Chr7	7_158576649_158577387	158576650	158577387	1.12066	Intron	10324	ENSG00000155093	PTPRN2	protein_coding	protein tyrosine phosphatase receptor type N2
Chr8	8_96160460_96160677	96160461	96160677	1.11885	Promoter (<=1kb)	129	ENSG00000156466	GDF6	protein_coding	growth differentiation factor 6
Chr22	22_37973434_37973841	37973435	37973841	1.11656	3' UTR	4190	ENSG00000100146	SOX10	protein_coding	SRY-box transcription factor 10
Chr17	17_73336964_73337205	73336965	73337205	1.11356	3' UTR	-24960	ENSG00000179604	CDC42EP4	protein_coding	CDC42 effector protein 4
Chr16	16_81713631_81713893	81713632	81713893	1.11356	Distal Intergenic	9775	ENSG00000153815	CMIP	protein_coding	c-Maf inducing protein
Chr8	8_120124185_120124517	120124186	120124517	1.11356	Promoter (<=1kb)	-585	ENSG00000187955	COL14A1	protein_coding	collagen type XIV alpha 1 chain
Chr10	10_99153005_99153345	99153006	99153345	1.11356	Intron	82457	ENSG00000172987	HPSE2	protein_coding	heparanase 2 (inactive)
Chr7	7_26176709_26176909	26176710	26176909	1.11356	Promoter (1-2kb)	-1094	ENSG00000050344	NFE2L3	protein_coding	NFE2 like bZIP transcription factor 3
Chr13	13_114030869_114031069	114030870	114031069	1.11356	Intron	5124	ENSG00000185989	RASA3	protein_coding	RAS p21 protein activator 3
Chr15	15_93087709_93088099	93087710	93088099	1.11356	Promoter (<=1kb)	424	ENSG00000182175	RGMA	protein_coding	repulsive guidance molecule BMP co-receptor a
Chr11	11_78197622_78197834	78197623	78197834	1.11356	Promoter (<=1kb)	826	ENSG00000118369	USP35	protein_coding	ubiquitin specific peptidase 35
Chr15	15_89642088_89642334	89642089	89642334	1.10945	Exon	-8557	ENSG00000166813	KIF7	protein_coding	kinesin family member 7
Chr6	6_158049476_158049857	158049477	158049857	1.10945	Intron	15987	ENSG00000078269	SYNJ2	protein_coding	synaptojanin 2
Chr19	19_10928087_10928396	10928088	10928396	1.10773	Promoter (<=1kb)	116	ENSG00000130733	YIPF2	protein_coding	Yip1 domain family member 2
Chr1	1_17825772_17826046	17825773	17826046	1.1035	Promoter (2-3kb)	2791	ENSG00000117148	ACTL8	protein_coding	actin like 8
Chr16	16_24906616_24906985	24906617	24906985	1.1035	3' UTR	14019	ENSG00000140750	ARHGAP17	protein_coding	Rho GTPase activating protein 17
Chr1	1_169115924_169116124	169115925	169116124	1.1035	Promoter (<=1kb)	-127	ENSG00000143153	ATP1B1	protein_coding	ATPase Na+/K+ transporting subunit beta 1
Chr7	7_138809094_138809320	138809095	138809320	1.1035	Intron	-9535	ENSG00000105929	ATP6V0A4	protein_coding	ATPase H+ transporting V0 subunit a4
Chr2	2_10721827_10722247	10721828	10722247	1.1035	Promoter (<=1kb)	179	ENSG00000143882	ATP6V1C2	protein_coding	ATPase H+ transporting V1 subunit C2
Chr20	20_50794362_50794745	50794363	50794745	1.1035	Promoter (<=1kb)	-149	ENSG00000124243	BCAS4	protein_coding	breast carcinoma amplified sequence 4
Chr3	3_101753362_101753659	101753363	101753659	1.1035	Intron	22324	ENSG00000182504	CEP97	protein_coding	centrosomal protein 97
Chr7	7_35058219_35058568	35058220	35058568	1.1035	Intron	-19949	ENSG00000173852	DPY19L1	protein_coding	dpy-19 like C-mannosyltransferase 1
ChrX	X_153628986_153629190	153628987	153629190	1.1035	Distal Intergenic	-13302	ENSG00000130829	DUSP9	protein_coding	dual specificity phosphatase 9
Chr1	1_23503559_23503759	23503560	23503759	1.1035	Downstream (2-3kb)	15637	ENSG00000007968	E2F2	protein_coding	E2F transcription factor 2
Chr1	1_217523718_217524027	217523719	217524027	1.1035	Intron	-24955	ENSG00000092978	GPATCH2	protein_coding	G-patch domain containing 2
Chr1	1_58773214_58773697	58773215	58773697	1.1035	Distal Intergenic	10350	ENSG00000177606	JUN	protein_coding	Jun proto-oncogene, AP-1 transcription factor subunit
Chr1	1_212381696_212381896	212381697	212381896	1.1035	Intron	-3991	ENSG00000065600	PACC1	protein_coding	proton activated chloride channel 1
Chr22	22_36838781_36838981	36838782	36838981	1.1035	Distal Intergenic	-19303	ENSG00000100362	PVALB	protein_coding	parvalbumin
Chr7	7_93108508_93108708	93108509	93108708	1.1035	Intron	9254	ENSG00000205413	SAMD9	protein_coding	sterile alpha motif domain containing 9
Chr16	16_55643206_55643473	55643207	55643473	1.1035	Distal Intergenic	-12515	ENSG00000103546	SLC6A2	protein_coding	solute carrier family 6 member 2
Chr1	1_151637224_151637492	151637225	151637492	1.1035	Promoter (1-2kb)	-1364	ENSG00000143376	SNX27	protein_coding	sorting nexin 27
Chr19	19_45854282_45854503	45854283	45854503	1.1035	Promoter (<=1kb)	702	ENSG00000125755	SYMPK	protein_coding	symplekin scaffold protein
Chr11	11_126292606_126292806	126292607	126292806	1.1035	Promoter (<=1kb)	272	ENSG00000150455	TIRAP	protein_coding	TIR domain containing adaptor protein
Chr7	7_66231635_66231835	66231636	66231835	1.1035	Intron	10032	ENSG00000169902	TPST1	protein_coding	tyrosylprotein sulfotransferase 1
Chr20	20_41203719_41203976	41203720	41203976	1.1035	Promoter (<=1kb)	65	ENSG00000174306	ZHX3	protein_coding	zinc fingers and homeoboxes 3
Chr9	9_106863443_106863988	106863444	106863988	1.0994	Promoter (<=1kb)	278	ENSG00000148143	ZNF462	protein_coding	zinc finger protein 462
Chr15	15_40421789_40422201	40421790	40422201	1.09779	Intron	5623	ENSG00000128928	IVD	protein_coding	isovaleryl-CoA dehydrogenase
ChrX	X_77527562_77527868	77527563	77527868	1.09411	Intron	-5095	ENSG00000085224	ATRX	protein_coding	ATRX chromatin remodeler
Chr21	21_44628923_44629201	44628924	44629201	1.09411	Promoter (1-2kb)	1801	ENSG00000221837	KRTAP10-9	protein_coding	keratin associated protein 10-9
Chr1	1_203753170_203753400	203753171	203753400	1.09411	Distal Intergenic	-11777	ENSG00000122188	LAX1	protein_coding	lymphocyte transmembrane adaptor 1
Chr17	17_38333802_38334021	38333803	38334021	1.08963	Exon	-5300	ENSG00000277399	GPR179	protein_coding	G protein-coupled receptor 179
Chr3	3_48399029_48399500	48399030	48399500	1.08963	Intron	6565	ENSG00000164050	PLXNB1	protein_coding	plexin B1
Chr2	2_222896489_222896689	222896490	222896689	1.07703	Intron	6673	ENSG00000123983	ACSL3	protein_coding	acyl-CoA synthetase long chain family member 3
Chr13	13_30760885_30761085	30760886	30761085	1.07703	Intron	18550	ENSG00000132965	ALOX5AP	protein_coding	arachidonate 5-lipoxygenase activating protein
Chr10	10_47461232_47461627	47461233	47461627	1.07703	Promoter (1-2kb)	1056	ENSG00000265190	ANXA8	protein_coding	annexin A8
Chr1	1_33099569_33099769	33099570	33099769	1.07703	Intron	4926	ENSG00000142920	AZIN2	protein_coding	antizyme inhibitor 2
Chr8	8_22598613_22598829	22598614	22598829	1.07703	Promoter (<=1kb)	-770	ENSG00000241852	C8orf58	protein_coding	chromosome 8 open reading frame 58
Chr15	15_101185313_101185513	101185314	101185513	1.07703	Promoter (2-3kb)	2357	ENSG00000131873	CHSY1	protein_coding	chondroitin sulfate synthase 1
Chr19	19_14578007_14578207	14578008	14578207	1.07703	Distal Intergenic	-4877	ENSG00000187912	CLEC17A	protein_coding	C-type lectin domain containing 17A
Chr1	1_57933771_57933971	57933772	57933971	1.07703	Intron	-49687	ENSG00000173406	DAB1	protein_coding	DAB adaptor protein 1
Chr6	6_116764927_116765401	116764928	116765401	1.07703	Promoter (<=1kb)	318	ENSG00000183807	FAM162B	protein_coding	family with sequence similarity 162 member B
Chr3	3_58669623_58669823	58669624	58669823	1.07703	Promoter (2-3kb)	-2790	ENSG00000198643	FAM3D	protein_coding	FAM3 metabolism regulating signaling molecule D
Chr4	4_15940853_15941153	15940854	15941153	1.07703	Promoter (2-3kb)	-2114	ENSG00000137440	FGFBP1	protein_coding	fibroblast growth factor binding protein 1
Chr7	7_86600467_86600667	86600468	86600667	1.07703	Distal Intergenic	-43242	ENSG00000198822	GRM3	protein_coding	glutamate metabotropic receptor 3
Chr2	2_241712989_241713189	241712990	241713189	1.07703	Intron	3904	ENSG00000168395	ING5	protein_coding	inhibitor of growth family member 5
Chr18	18_35118603_35118902	35118604	35118902	1.07703	Intron	-13016	ENSG00000166974	MAPRE2	protein_coding	microtubule associated protein RP/EB family member 2
Chr15	15_73296074_73296390	73296075	73296390	1.07703	Promoter (1-2kb)	-1909	ENSG00000067141	NEO1	protein_coding	neogenin 1
Chr20	20_51542320_51542520	51542321	51542520	1.07703	Promoter (<=1kb)	199	ENSG00000101096	NFATC2	protein_coding	nuclear factor of activated T cells 2
Chr14	14_33800593_33800793	33800594	33800793	1.07703	3' UTR	65353	ENSG00000151322	NPAS3	protein_coding	neuronal PAS domain protein 3
Chr3	3_98407035_98407235	98407036	98407235	1.07703	Intron	16370	ENSG00000206536	OR5K3	protein_coding	olfactory receptor family 5 subfamily K member 3
Chr8	8_96339087_96339287	96339088	96339287	1.07703	Distal Intergenic	8771	ENSG00000156471	PTDSS1	protein_coding	phosphatidylserine synthase 1
Chr19	19_5652246_5652446	5652247	5652446	1.07703	Promoter (2-3kb)	2563	ENSG00000160633	SAFB	protein_coding	scaffold attachment factor B
Chr15	15_45179481_45179747	45179482	45179747	1.07703	Promoter (1-2kb)	-1222	ENSG00000138606	SHF	protein_coding	Src homology 2 domain containing F
Chr8	8_42508237_42508437	42508238	42508437	1.07703	Intron	-5610	ENSG00000168575	SLC20A2	protein_coding	solute carrier family 20 member 2
Chr1	1_98784069_98784269	98784070	98784269	1.07703	Distal Intergenic	121847	ENSG00000162627	SNX7	protein_coding	sorting nexin 7
Chr9	9_33211806_33212030	33211807	33212030	1.07703	Distal Intergenic	-6335	ENSG00000122711	SPINK4	protein_coding	serine peptidase inhibitor Kazal type 4
Chr2	2_96172012_96172334	96172013	96172334	1.07703	Distal Intergenic	15783	ENSG00000084090	STARD7	protein_coding	StAR related lipid transfer domain containing 7
Chr8	8_42859327_42859527	42859328	42859527	1.07703	Intron	-16003	ENSG00000131931	THAP1	protein_coding	THAP domain containing 1
Chr7	7_142928748_142928948	142928749	142928948	1.07703	Exon	4493	ENSG00000127412	TRPV5	protein_coding	transient receptor potential cation channel subfamily V member 5
Chr6	6_87239245_87239484	87239246	87239484	1.07703	Intron	5819	ENSG00000188994	ZNF292	protein_coding	zinc finger protein 292
Chr9	9_96890064_96890264	96890065	96890264	1.07703	Exon	-14442	ENSG00000196597	ZNF782	protein_coding	zinc finger protein 782
Chr19	19_42741664_42742310	42741665	42742310	1.06775	Promoter (1-2kb)	-1184	ENSG00000221826	PSG3	protein_coding	pregnancy specific beta-1-glycoprotein 3
Chr6	6_154172352_154172692	154172353	154172692	1.06192	Intron	-12837	ENSG00000074706	IPCEF1	protein_coding	interaction protein for cytohesin exchange factors 1
Chr2	2_240780680_240780883	240780681	240780883	1.06192	Promoter (<=1kb)	-21	ENSG00000130294	KIF1A	protein_coding	kinesin family member 1A
Chr1	1_25568618_25568826	25568619	25568826	1.06192	3' UTR	4028	ENSG00000157978	LDLRAP1	protein_coding	low density lipoprotein receptor adaptor protein 1
Chr21	21_46201014_46201214	46201015	46201214	1.06192	Intron	-4644	ENSG00000160285	LSS	protein_coding	lanosterol synthase
ChrX	X_51496071_51496377	51496072	51496377	1.05911	Promoter (<=1kb)	215	ENSG00000196368	NUDT11	protein_coding	nudix hydrolase 11
Chr6	6_30720924_30721124	30720925	30721124	1.05841	Promoter (<=1kb)	-450	ENSG00000196230	TUBB	protein_coding	tubulin beta class I
Chr15	15_88847741_88847941	88847742	88847941	1.05501	Exon	-25028	ENSG00000157766	ACAN	protein_coding	aggrecan
Chr21	21_39638064_39638409	39638065	39638409	1.05501	Intron	-3976	ENSG00000183778	B3GALT5	protein_coding	beta-1,3-galactosyltransferase 5
Chr1	1_209613095_209613406	209613096	209613406	1.05501	3' UTR	5302	ENSG00000008118	CAMK1G	protein_coding	calcium/calmodulin dependent protein kinase IG
Chr1	1_36115291_36115491	36115292	36115491	1.05501	Intron	9731	ENSG00000171812	COL8A2	protein_coding	collagen type VIII alpha 2 chain
Chr14	14_103345879_103346079	103345880	103346079	1.05501	Distal Intergenic	4910	ENSG00000100664	EIF5	protein_coding	eukaryotic translation initiation factor 5
ChrX	X_54483608_54483813	54483609	54483813	1.05501	Intron	12421	ENSG00000102302	FGD1	protein_coding	FYVE, RhoGEF and PH domain containing 1
Chr11	11_58934711_58935194	58934712	58935194	1.05501	Exon	-4254	ENSG00000166840	GLYATL1	protein_coding	glycine-N-acyltransferase like 1
Chr6	6_125759121_125759714	125759122	125759714	1.05501	Exon	9490	ENSG00000135547	HEY2	protein_coding	hes related family bHLH transcription factor with YRPW motif 2
Chr17	17_62807891_62808274	62807892	62808274	1.05501	Promoter (<=1kb)	16	ENSG00000173838	MARCHF10	protein_coding	membrane associated ring-CH-type finger 10
Chr6	6_18121609_18121809	18121610	18121809	1.05501	Promoter (<=1kb)	868	ENSG00000187566	NHLRC1	protein_coding	NHL repeat containing E3 ubiquitin protein ligase 1
Chr19	19_48661525_48661725	48661526	48661725	1.05501	3' UTR	11292	ENSG00000142233	NTN5	protein_coding	netrin 5
Chr5	5_23492251_23492603	23492252	23492603	1.05501	Intron	-14552	ENSG00000164256	PRDM9	protein_coding	PR/SET domain 9
ChrX	X_104138745_104139021	104138746	104139021	1.05501	Intron	17967	ENSG00000269743	SLC25A53	protein_coding	solute carrier family 25 member 53
Chr19	19_56638162_56638362	56638163	56638362	1.05501	Intron	-4797	ENSG00000268182	SMIM17	protein_coding	small integral membrane protein 17
Chr11	11_113681506_113681706	113681507	113681706	1.05501	Distal Intergenic	12031	ENSG00000166682	TMPRSS5	protein_coding	transmembrane serine protease 5
Chr8	8_31057188_31057496	31057189	31057496	1.05501	Intron	-10813	ENSG00000165392	WRN	protein_coding	WRN RecQ like helicase
Chr1	1_4633147_4633661	4633148	4633661	1.05104	Distal Intergenic	-20948	ENSG00000196581	AJAP1	protein_coding	adherens junctions associated protein 1
Chr17	17_75861446_75861710	75861447	75861710	1.04846	Distal Intergenic	-4940	ENSG00000132471	WBP2	protein_coding	WW domain binding protein 2
Chr3	3_124750796_124751177	124750797	124751177	1.04532	Distal Intergenic	12172	ENSG00000114491	UMPS	protein_coding	uridine monophosphate synthetase
Chr12	12_22334731_22335698	22334732	22335698	1.04282	Promoter (<=1kb)	-18	ENSG00000111728	ST8SIA1	protein_coding	ST8 alpha-N-acetyl-neuraminide alpha-2,8-sialyltransferase 1
Chr3	3_50542091_50542291	50542092	50542291	1.03639	Distal Intergenic	19620	ENSG00000088543	C3orf18	protein_coding	chromosome 3 open reading frame 18
Chr3	3_45021256_45021456	45021257	45021456	1.03639	Intron	-4847	ENSG00000163815	CLEC3B	protein_coding	C-type lectin domain family 3 member B
Chr7	7_50502656_50502856	50502657	50502856	1.03639	Intron	-22694	ENSG00000132437	DDC	protein_coding	dopa decarboxylase
Chr4	4_100267158_100267358	100267159	100267358	1.03639	Distal Intergenic	-76377	ENSG00000145358	DDIT4L	protein_coding	DNA damage inducible transcript 4 like
Chr21	21_46498181_46498381	46498182	46498381	1.03639	Intron	-5932	ENSG00000160305	DIP2A	protein_coding	disco interacting protein 2 homolog A
Chr9	9_969850_970059	969851	970059	1.03639	Distal Intergenic	-6596	ENSG00000064218	DMRT3	protein_coding	doublesex and mab-3 related transcription factor 3
Chr12	12_56068346_56068546	56068347	56068546	1.03639	Distal Intergenic	-8253	ENSG00000065361	ERBB3	protein_coding	erb-b2 receptor tyrosine kinase 3
Chr3	3_172169107_172169441	172169108	172169441	1.03639	Intron	20573	ENSG00000075420	FNDC3B	protein_coding	fibronectin type III domain containing 3B
Chr1	1_212624635_212625078	212624636	212625078	1.03639	Promoter (<=1kb)	162	ENSG00000162771	GARIN4	protein_coding	golgi associated RAB2 interactor family member 4
Chr15	15_28553887_28554087	28553888	28554087	1.03639	Promoter (<=1kb)	320	ENSG00000227717	GOLGA6L25	protein_coding	golgin A6 family like 25
Chr16	16_85411073_85411273	85411074	85411273	1.03639	Intron	53611	ENSG00000131149	GSE1	protein_coding	Gse1 coiled-coil protein
Chr10	10_104297825_104298025	104297826	104298025	1.03639	Promoter (2-3kb)	2551	ENSG00000065621	GSTO2	protein_coding	glutathione S-transferase omega 2
Chr12	12_65812918_65813118	65812919	65813118	1.03639	Intron	-11342	ENSG00000149948	HMGA2	protein_coding	high mobility group AT-hook 2
Chr3	3_122747512_122747782	122747513	122747782	1.03639	Intron	-5737	ENSG00000169087	HSPBAP1	protein_coding	HSPB1 associated protein 1
Chr2	2_96602322_96602522	96602323	96602522	1.03639	Promoter (<=1kb)	-412	ENSG00000114982	KANSL3	protein_coding	KAT8 regulatory NSL complex subunit 3
Chr8	8_132400612_132400812	132400613	132400812	1.03639	Intron	46450	ENSG00000184156	KCNQ3	protein_coding	potassium voltage-gated channel subfamily Q member 3
Chr1	1_161291948_161292148	161291949	161292148	1.03639	Distal Intergenic	14042	ENSG00000158887	MPZ	protein_coding	myelin protein zero
Chr16	16_15756751_15756951	15756752	15756951	1.03639	Intron	-9179	ENSG00000133392	MYH11	protein_coding	myosin heavy chain 11
Chr10	10_26081277_26081519	26081278	26081519	1.03639	Intron	-84323	ENSG00000095777	MYO3A	protein_coding	myosin IIIA
Chr16	16_3350009_3350209	3350010	3350209	1.03639	Distal Intergenic	-5680	ENSG00000168158	OR2C1	protein_coding	olfactory receptor family 2 subfamily C member 1
Chr11	11_12410190_12410399	12410191	12410399	1.03639	Intron	11950	ENSG00000197702	PARVA	protein_coding	parvin alpha
Chr1	1_63746356_63746556	63746357	63746556	1.03639	Distal Intergenic	-27461	ENSG00000185483	ROR1	protein_coding	receptor tyrosine kinase like orphan receptor 1
Chr15	15_76624915_76625117	76624916	76625117	1.03639	Intron	-3087	ENSG00000140386	SCAPER	protein_coding	S-phase cyclin A associated protein in the ER
Chr1	1_66509895_66510268	66509896	66510268	1.03639	Distal Intergenic	-22999	ENSG00000118473	SGIP1	protein_coding	SH3GL interacting endocytic adaptor 1
ChrX	X_50556865_50557065	50556866	50557065	1.03639	Distal Intergenic	39172	ENSG00000158352	SHROOM4	protein_coding	shroom family member 4
Chr17	17_32998468_32998668	32998469	32998668	1.03639	Distal Intergenic	5618	ENSG00000141316	SPACA3	protein_coding	sperm acrosome associated 3
Chr7	7_139769015_139769215	139769016	139769215	1.03639	Intron	-7836	ENSG00000059377	TBXAS1	protein_coding	thromboxane A synthase 1
Chr1	1_156285986_156286186	156285987	156286186	1.03639	Promoter (<=1kb)	-90	ENSG00000163472	TMEM79	protein_coding	transmembrane protein 79
Chr17	17_40500477_40500677	40500478	40500677	1.03639	Promoter (<=1kb)	946	ENSG00000131746	TNS4	protein_coding	tensin 4
Chr8	8_140270158_140270358	140270159	140270358	1.03639	Intron	5395	ENSG00000167632	TRAPPC9	protein_coding	trafficking protein particle complex subunit 9
Chr21	21_37195246_37195446	37195247	37195446	1.03639	Promoter (<=1kb)	794	ENSG00000182670	TTC3	protein_coding	tetratricopeptide repeat domain 3
Chr20	20_2851896_2852302	2851897	2852302	1.03639	Intron	-8668	ENSG00000215305	VPS16	protein_coding	VPS16 core subunit of CORVET and HOPS complexes
Chr16	16_19699582_19699789	19699583	19699789	1.03639	Promoter (<=1kb)	207	ENSG00000103544	VPS35L	protein_coding	VPS35 endosomal protein sorting factor like
Chr13	13_51696097_51696297	51696098	51696297	1.03639	Intron	-42851	ENSG00000139668	WDFY2	protein_coding	WD repeat and FYVE domain containing 2
Chr12	12_42302797_42302997	42302798	42302997	1.03639	Intron	11265	ENSG00000139168	ZCRB1	protein_coding	zinc finger CCHC-type and RNA binding motif containing 1
Chr18	18_76895598_76895830	76895599	76895830	1.03639	Promoter (2-3kb)	-2262	ENSG00000130856	ZNF236	protein_coding	zinc finger protein 236
Chr20	20_25685957_25686157	25685958	25686157	1.03639	Promoter (<=1kb)	800	ENSG00000130684	ZNF337	protein_coding	zinc finger protein 337
Chr1	1_39492584_39492797	39492585	39492797	1.02812	Promoter (<=1kb)	949	ENSG00000183682	BMP8A	protein_coding	bone morphogenetic protein 8a
Chr18	18_37524683_37524885	37524684	37524885	1.0255	Intron	-38650	ENSG00000101489	CELF4	protein_coding	CUGBP Elav-like family member 4
Chr19	19_54775652_54775922	54775653	54775922	1.0255	Intron	5828	ENSG00000125498	KIR2DL1	protein_coding	killer cell immunoglobulin like receptor, two Ig domains and long cytoplasmic tail 1
Chr5	5_179762310_179762626	179762311	179762626	1.0255	Intron	-6226	ENSG00000161021	MAML1	protein_coding	mastermind like transcriptional coactivator 1
Chr12	12_94147940_94148250	94147941	94148250	1.0255	Promoter (<=1kb)	-327	ENSG00000136040	PLXNC1	protein_coding	plexin C1
Chr7	7_87747425_87747881	87747426	87747881	1.02045	Intron	-34103	ENSG00000085563	ABCB1	protein_coding	ATP binding cassette subfamily B member 1
Chr4	4_109092249_109092596	109092250	109092596	1.02045	Intron	209771	ENSG00000188517	COL25A1	protein_coding	collagen type XXV alpha 1 chain
Chr2	2_73284587_73284787	73284588	73284787	1.02045	Promoter (<=1kb)	-110	ENSG00000163013	FBXO41	protein_coding	F-box protein 41
Chr6	6_108663720_108664030	108663721	108664030	1.02045	Exon	7375	ENSG00000118689	FOXO3	protein_coding	forkhead box O3
Chr19	19_12897053_12897253	12897054	12897253	1.02045	Promoter (<=1kb)	-50	ENSG00000105607	GCDH	protein_coding	glutaryl-CoA dehydrogenase
Chr2	2_17879436_17879655	17879437	17879655	1.02045	Promoter (<=1kb)	54	ENSG00000170745	KCNS3	protein_coding	potassium voltage-gated channel modifier subfamily S member 3
Chr20	20_56249412_56249652	56249413	56249652	1.02045	Promoter (<=1kb)	681	ENSG00000124089	MC3R	protein_coding	melanocortin 3 receptor
Chr1	1_47192793_47193110	47192794	47193110	1.02045	Promoter (1-2kb)	-1750	ENSG00000162366	PDZK1IP1	protein_coding	PDZK1 interacting protein 1
Chr12	12_93591433_93591800	93591434	93591800	1.02045	Distal Intergenic	16376	ENSG00000120833	SOCS2	protein_coding	suppressor of cytokine signaling 2
Chr1	1_228038807_228039007	228038808	228039007	1.02045	Intron	31810	ENSG00000154342	WNT3A	protein_coding	Wnt family member 3A
Chr2	2_73921275_73921525	73921276	73921525	1.01563	Distal Intergenic	-5301	ENSG00000114956	DGUOK	protein_coding	deoxyguanosine kinase
Chr12	12_26884741_26885143	26884742	26885143	1.01563	Distal Intergenic	21341	ENSG00000064102	INTS13	protein_coding	integrator complex subunit 13
Chr17	17_74351844_74352312	74351845	74352312	1.01563	Exon	3255	ENSG00000196169	KIF19	protein_coding	kinesin family member 19
Chr1	1_45620856_45621167	45620857	45621167	1.01331	Promoter (1-2kb)	1606	ENSG00000159588	CCDC17	protein_coding	coiled-coil domain containing 17
Chr20	20_62467018_62467418	62467019	62467418	1.01331	Intron	8577	ENSG00000130700	GATA5	protein_coding	GATA binding protein 5
Chr7	7_150860586_150860843	150860587	150860843	1.00664	Promoter (2-3kb)	2654	ENSG00000002726	AOC1	protein_coding	amine oxidase copper containing 1
Chr2	2_240698899_240699160	240698900	240699160	1.00664	Promoter (1-2kb)	1925	ENSG00000184945	AQP12A	protein_coding	aquaporin 12A
Chr7	7_33994043_33994243	33994044	33994243	1.00664	Intron	16957	ENSG00000164619	BMPER	protein_coding	BMP binding endothelial regulator
Chr7	7_21536883_21537083	21536884	21537083	1.00664	Distal Intergenic	-5956	ENSG00000105877	DNAH11	protein_coding	dynein axonemal heavy chain 11
Chr12	12_25182463_25182682	25182464	25182682	1.00664	Intron	12416	ENSG00000118307	DNAI7	protein_coding	dynein axonemal intermediate chain 7
Chr2	2_229743208_229743471	229743209	229743471	1.00664	Distal Intergenic	-28654	ENSG00000187957	DNER	protein_coding	delta/notch like EGF repeat containing
Chr19	19_53594570_53594770	53594571	53594770	1.00664	Distal Intergenic	-6007	ENSG00000204595	DPRX	protein_coding	divergent-paired related homeobox
Chr1	1_225571332_225571532	225571333	225571532	1.00664	Intron	-4063	ENSG00000154380	ENAH	protein_coding	ENAH actin regulator
Chr5	5_54985277_54985578	54985278	54985578	1.00664	Promoter (<=1kb)	15	ENSG00000164283	ESM1	protein_coding	endothelial cell specific molecule 1
Chr4	4_158882325_158882525	158882326	158882525	1.00664	Intron	11967	ENSG00000052795	FNIP2	protein_coding	folliculin interacting protein 2
Chr1	1_212014753_212015090	212014754	212015090	1.00664	Intron	-3127	ENSG00000143493	INTS7	protein_coding	integrator complex subunit 7
Chr7	7_27857001_27857201	27857002	27857201	1.00664	Intron	6879	ENSG00000153814	JAZF1	protein_coding	JAZF zinc finger 1
Chr5	5_69431050_69431250	69431051	69431250	1.00664	Intron	11665	ENSG00000152939	MARVELD2	protein_coding	MARVEL domain containing 2
Chr8	8_97723614_97723814	97723615	97723814	1.00664	Intron	17203	ENSG00000147649	MTDH	protein_coding	metadherin
Chr7	7_95379615_95379815	95379616	95379815	1.00664	Intron	-13703	ENSG00000105852	PON3	protein_coding	paraoxonase 3
Chr11	11_111222068_111222268	111222069	111222268	1.00664	Distal Intergenic	-23457	ENSG00000150750	POU2AF2	protein_coding	POU class 2 homeobox associating factor 2
ChrX	X_110448596_110448796	110448597	110448796	1.00664	Promoter (1-2kb)	-1769	ENSG00000243978	RTL9	protein_coding	retrotransposon Gag like 9
Chr14	14_59819794_59819994	59819795	59819994	1.00664	Intron	50782	ENSG00000139970	RTN1	protein_coding	reticulon 1
Chr9	9_35546666_35546866	35546667	35546866	1.00664	Exon	7687	ENSG00000198853	RUSC2	protein_coding	RUN and SH3 domain containing 2
Chr2	2_235005852_235006128	235005853	235006128	1.00664	Intron	11013	ENSG00000130147	SH3BP4	protein_coding	SH3 domain binding protein 4
Chr2	2_200468246_200468447	200468247	200468447	1.00664	Promoter (1-2kb)	-1293	ENSG00000196141	SPATS2L	protein_coding	spermatogenesis associated serine rich 2 like
Chr11	11_67007258_67007458	67007259	67007458	1.00664	Promoter (<=1kb)	481	ENSG00000173227	SYT12	protein_coding	synaptotagmin 12
Chr11	11_78823225_78823425	78823226	78823425	1.00664	Intron	-17815	ENSG00000149256	TENM4	protein_coding	teneurin transmembrane protein 4
Chr1	1_20309940_20310140	20309941	20310140	1.00664	Intron	6860	ENSG00000158816	VWA5B1	protein_coding	von Willebrand factor A domain containing 5B1
Chr19	19_51904612_51904957	51904613	51904957	1.00664	Promoter (<=1kb)	54	ENSG00000198093	ZNF649	protein_coding	zinc finger protein 649
Chr9	9_113011876_113012076	113011877	113012076	1.00664	Promoter (<=1kb)	116	ENSG00000228623	ZNF883	protein_coding	zinc finger protein 883
Chr17	17_44759435_44759856	44759436	44759856	1.00162	Promoter (<=1kb)	111	ENSG00000073670	ADAM11	protein_coding	ADAM metallopeptidase domain 11
Chr6	6_125780304_125781105	125780305	125781105	1.00087	Promoter (<=1kb)	-56	ENSG00000111912	NCOA7	protein_coding	nuclear receptor coactivator 7
Chr19	19_4284616_4285043	4284617	4285043	-1.00229	Promoter (<=1kb)	186	ENSG00000105251	SHD	protein_coding	Src homology 2 domain containing transforming protein D
Chr13	13_78609459_78609852	78609460	78609852	-1.00314	Intron	-5908	ENSG00000152192	POU4F1	protein_coding	POU class 4 homeobox 1
Chr22	22_39328128_39328707	39328129	39328707	-1.00314	Distal Intergenic	-7740	ENSG00000100316	RPL3	protein_coding	ribosomal protein L3
Chr20	20_32652688_32653209	32652689	32653209	-1.00703	Intron	4153	ENSG00000198547	C20orf203	protein_coding	chromosome 20 open reading frame 203
Chr19	19_54220889_54221254	54220890	54221254	-1.00703	Promoter (<=1kb)	-100	ENSG00000204577	LILRB3	protein_coding	leukocyte immunoglobulin like receptor B3
Chr1	1_26997764_26998138	26997765	26998138	-1.00703	Intron	3446	ENSG00000253368	TRNP1	protein_coding	TMF1 regulated nuclear protein 1
Chr9	9_136294350_136294639	136294351	136294639	-1.00912	Intron	9431	ENSG00000260220	CCDC187	protein_coding	coiled-coil domain containing 187
Chr17	17_81230398_81230676	81230399	81230676	-1.00912	Promoter (1-2kb)	1001	ENSG00000167302	TEPSIN	protein_coding	TEPSIN adaptor related protein complex 4 accessory protein
Chr1	1_230698241_230698574	230698242	230698574	-1.01197	Promoter (1-2kb)	-1354	ENSG00000135744	AGT	protein_coding	angiotensinogen
Chr14	14_104094665_104094903	104094666	104094903	-1.01197	Promoter (1-2kb)	1175	ENSG00000166183	ASPG	protein_coding	asparaginase
Chr3	3_184354306_184354516	184354307	184354516	-1.01197	Promoter (<=1kb)	443	ENSG00000114859	CLCN2	protein_coding	chloride voltage-gated channel 2
Chr2	2_95330495_95330695	95330496	95330695	-1.01197	Intron	12650	ENSG00000115041	KCNIP3	protein_coding	potassium voltage-gated channel interacting protein 3
Chr8	8_55847721_55848106	55847722	55848106	-1.01197	Distal Intergenic	-31729	ENSG00000254087	LYN	protein_coding	LYN proto-oncogene, Src family tyrosine kinase
Chr14	14_105191116_105191465	105191117	105191465	-1.01197	Distal Intergenic	-9794	ENSG00000183828	NUDT14	protein_coding	nudix hydrolase 14
Chr11	11_17573025_17573393	17573026	17573393	-1.01197	Exon	-4871	ENSG00000188162	OTOG	protein_coding	otogelin
Chr10	10_69474640_69475129	69474641	69475129	-1.01197	Intron	-8696	ENSG00000099282	TSPAN15	protein_coding	tetraspanin 15
Chr12	12_29149944_29150176	29149945	29150176	-1.01608	Promoter (<=1kb)	593	ENSG00000064763	FAR2	protein_coding	fatty acyl-CoA reductase 2
Chr3	3_50311585_50311946	50311586	50311946	-1.01608	Promoter (<=1kb)	435	ENSG00000114378	HYAL1	protein_coding	hyaluronidase 1
Chr20	20_35269312_35269512	35269313	35269512	-1.01608	Promoter (2-3kb)	2544	ENSG00000126005	MMP24OS	protein_coding	MMP24 opposite strand
Chr4	4_168930981_168931608	168930982	168931608	-1.01608	Intron	9407	ENSG00000129116	PALLD	protein_coding	palladin, cytoskeletal associated protein
Chr2	2_127981177_127981811	127981178	127981811	-1.01608	Intron	45482	ENSG00000136715	SAP130	protein_coding	Sin3A associated protein 130
Chr3	3_126482075_126482301	126482076	126482301	-1.01608	3' UTR	-6185	ENSG00000070476	ZXDC	protein_coding	ZXD family zinc finger C
Chr9	9_123353944_123354362	123353945	123354362	-1.01788	Promoter (1-2kb)	-1808	ENSG00000148204	CRB2	protein_coding	crumbs cell polarity complex component 2
Chr22	22_38981102_38981302	38981103	38981302	-1.0225	Promoter (1-2kb)	-1045	ENSG00000179750	APOBEC3B	protein_coding	apolipoprotein B mRNA editing enzyme catalytic subunit 3B
Chr7	7_82499521_82499860	82499522	82499860	-1.0225	Distal Intergenic	-55566	ENSG00000153956	CACNA2D1	protein_coding	calcium voltage-gated channel auxiliary subunit alpha2delta 1
Chr16	16_69962901_69963262	69962902	69963262	-1.0225	Exon	11161	ENSG00000157322	CLEC18A	protein_coding	C-type lectin domain family 18 member A
Chr10	10_67387113_67387437	67387114	67387437	-1.0225	Promoter (<=1kb)	57	ENSG00000183230	CTNNA3	protein_coding	catenin alpha 3
Chr19	19_38634914_38635114	38634915	38635114	-1.0225	Promoter (2-3kb)	2889	ENSG00000178982	EIF3K	protein_coding	eukaryotic translation initiation factor 3 subunit K
Chr9	9_37518124_37518345	37518125	37518345	-1.0225	3' UTR	6812	ENSG00000147912	FBXO10	protein_coding	F-box protein 10
Chr5	5_180361532_180361732	180361533	180361732	-1.0225	Distal Intergenic	-8197	ENSG00000131459	GFPT2	protein_coding	glutamine-fructose-6-phosphate transaminase 2
Chr9	9_124511299_124511542	124511300	124511542	-1.0225	Distal Intergenic	-3880	ENSG00000136931	NR5A1	protein_coding	nuclear receptor subfamily 5 group A member 1
Chr7	7_143511434_143511834	143511435	143511834	-1.0225	Exon	7635	ENSG00000176510	OR10AC1	protein_coding	olfactory receptor family 10 subfamily AC member 1 (gene/pseudogene)
Chr7	7_44804405_44804626	44804406	44804626	-1.0225	Intron	5592	ENSG00000196262	PPIA	protein_coding	peptidylprolyl isomerase A
Chr13	13_44373099_44373485	44373100	44373485	-1.0225	Promoter (<=1kb)	-180	ENSG00000151778	SERP2	protein_coding	stress associated endoplasmic reticulum protein family member 2
Chr15	15_65101914_65102201	65101915	65102201	-1.0225	Promoter (<=1kb)	-287	ENSG00000246922	UBAP1L	protein_coding	ubiquitin associated protein 1 like
Chr2	2_240851385_240851697	240851386	240851697	-1.0273	Distal Intergenic	-17127	ENSG00000172482	AGXT	protein_coding	alanine--glyoxylate aminotransferase
Chr1	1_110106117_110106964	110106118	110106964	-1.0273	Intron	-5479	ENSG00000186150	UBL4B	protein_coding	ubiquitin like 4B
Chr15	15_78804526_78804812	78804527	78804812	-1.034	Intron	-3983	ENSG00000136378	ADAMTS7	protein_coding	ADAM metallopeptidase with thrombospondin type 1 motif 7
Chr13	13_26022729_26022929	26022730	26022929	-1.034	3' UTR	12759	ENSG00000132932	ATP8A2	protein_coding	ATPase phospholipid transporting 8A2
Chr12	12_2651079_2651373	2651080	2651373	-1.034	Promoter (<=1kb)	-112	ENSG00000151067	CACNA1C	protein_coding	calcium voltage-gated channel subunit alpha1 C
Chr7	7_80528731_80529070	80528732	80529070	-1.034	Intron	3871	ENSG00000135218	CD36	protein_coding	CD36 molecule (CD36 blood group)
Chr15	15_78607727_78607974	78607728	78607974	-1.034	Promoter (<=1kb)	-204	ENSG00000080644	CHRNA3	protein_coding	cholinergic receptor nicotinic alpha 3 subunit
Chr12	12_122356666_122356966	122356667	122356966	-1.034	Promoter (<=1kb)	-507	ENSG00000130779	CLIP1	protein_coding	CAP-Gly domain containing linker protein 1
Chr5	5_76953117_76953338	76953118	76953338	-1.034	Promoter (<=1kb)	69	ENSG00000145708	CRHBP	protein_coding	corticotropin releasing hormone binding protein
ChrX	X_154773875_154774121	154773876	154774121	-1.034	Promoter (<=1kb)	732	ENSG00000130826	DKC1	protein_coding	dyskerin pseudouridine synthase 1
Chr18	18_34726922_34727205	34726923	34727205	-1.034	Intron	16496	ENSG00000134769	DTNA	protein_coding	dystrobrevin alpha
Chr1	1_157505483_157505686	157505484	157505686	-1.034	Distal Intergenic	10387	ENSG00000143297	FCRL5	protein_coding	Fc receptor like 5
Chr1	1_240113163_240113545	240113164	240113545	-1.034	Intron	-9582	ENSG00000155816	FMN2	protein_coding	formin 2
Chr16	16_10181275_10181475	10181276	10181475	-1.034	Promoter (<=1kb)	163	ENSG00000183454	GRIN2A	protein_coding	glutamate ionotropic receptor NMDA type subunit 2A
Chr3	3_72889931_72890131	72889932	72890131	-1.034	Promoter (1-2kb)	1886	ENSG00000172986	GXYLT2	protein_coding	glucoside xylosyltransferase 2
Chr8	8_28880972_28881410	28880973	28881410	-1.034	Intron	8499	ENSG00000104299	INTS9	protein_coding	integrator complex subunit 9
Chr6	6_150356015_150356282	150356016	150356282	-1.034	Distal Intergenic	-12610	ENSG00000009765	IYD	protein_coding	iodotyrosine deiodinase
Chr5	5_78633127_78633396	78633128	78633396	-1.034	Intron	8766	ENSG00000145685	LHFPL2	protein_coding	LHFPL tetraspan subfamily member 2
Chr1	1_220800796_220801068	220800797	220801068	-1.034	Exon	3035	ENSG00000186205	MTARC1	protein_coding	mitochondrial amidoxime reducing component 1
Chr6	6_30986907_30987172	30986908	30987172	-1.034	5' UTR	3190	ENSG00000204544	MUC21	protein_coding	mucin 21, cell surface associated
Chr20	20_64192441_64192641	64192442	64192641	-1.034	Intron	27830	ENSG00000196132	MYT1	protein_coding	myelin transcription factor 1
Chr10	10_47922523_47922723	47922524	47922723	-1.034	Exon	3785	ENSG00000264717	NPY4R2	protein_coding	neuropeptide Y receptor Y4-2
Chr1	1_161233178_161233439	161233179	161233439	-1.034	Promoter (<=1kb)	-317	ENSG00000143257	NR1I3	protein_coding	nuclear receptor subfamily 1 group I member 3
Chr8	8_143852471_143852671	143852472	143852671	-1.034	Distal Intergenic	-11499	ENSG00000185189	NRBP2	protein_coding	nuclear receptor binding protein 2
Chr1	1_51847314_51847555	51847315	51847555	-1.034	Intron	-6861	ENSG00000078618	NRDC	protein_coding	nardilysin convertase
Chr1	1_232998209_232998409	232998210	232998409	-1.034	Promoter (1-2kb)	1218	ENSG00000135749	PCNX2	protein_coding	pecanex 2
Chr15	15_84963494_84963762	84963495	84963762	-1.034	Distal Intergenic	-16678	ENSG00000073417	PDE8A	protein_coding	phosphodiesterase 8A
Chr7	7_142751476_142751753	142751477	142751753	-1.034	Promoter (<=1kb)	367	ENSG00000204983	PRSS1	protein_coding	serine protease 1
Chr9	9_76665370_76665640	76665371	76665640	-1.034	Intron	-12822	ENSG00000106772	PRUNE2	protein_coding	prune homolog 2 with BCH domain
Chr15	15_89499171_89499522	89499172	89499522	-1.034	Promoter (2-3kb)	-2583	ENSG00000140519	RHCG	protein_coding	Rh family C glycoprotein
Chr11	11_62311268_62311692	62311269	62311692	-1.034	Distal Intergenic	-12194	ENSG00000197745	SCGB1D4	protein_coding	secretoglobin family 1D member 4
Chr10	10_80599465_80599741	80599466	80599741	-1.034	Intron	-7558	ENSG00000178217	SH2D4B	protein_coding	SH2 domain containing 4B
Chr1	1_16417945_16418145	16417946	16418145	-1.034	Intron	13226	ENSG00000187144	SPATA21	protein_coding	spermatogenesis associated 21
Chr12	12_26985984_26986356	26985985	26986356	-1.034	Intron	4190	ENSG00000064115	TM7SF3	protein_coding	transmembrane 7 superfamily member 3
Chr12	12_98567197_98567432	98567198	98567432	-1.034	Distal Intergenic	22559	ENSG00000120802	TMPO	protein_coding	thymopoietin
Chr6	6_110116265_110116610	110116266	110116610	-1.034	Intron	63039	ENSG00000112290	WASF1	protein_coding	WASP family member 1
Chr17	17_81793581_81794021	81793582	81794021	-1.03845	Distal Intergenic	-10111	ENSG00000215644	GCGR	protein_coding	glucagon receptor
Chr7	7_1116937_1117238	1116938	1117238	-1.04015	Intron	10150	ENSG00000146540	C7orf50	protein_coding	chromosome 7 open reading frame 50
Chr16	16_2987822_2988029	2987823	2988029	-1.04015	Promoter (<=1kb)	-227	ENSG00000262152	GREP1	protein_coding	glycine rich extracellular protein 1
Chr1	1_205648466_205648937	205648467	205648937	-1.04015	Distal Intergenic	13731	ENSG00000158715	SLC45A3	protein_coding	solute carrier family 45 member 3
Chr5	5_1289132_1289332	1289133	1289332	-1.04015	Intron	5657	ENSG00000164362	TERT	protein_coding	telomerase reverse transcriptase
Chr21	21_43973649_43973849	43973650	43973849	-1.04398	Promoter (2-3kb)	2247	ENSG00000160216	AGPAT3	protein_coding	1-acylglycerol-3-phosphate O-acyltransferase 3
Chr15	15_68795418_68795665	68795419	68795665	-1.04398	Intron	-3171	ENSG00000140350	ANP32A	protein_coding	acidic nuclear phosphoprotein 32 family member A
Chr12	12_103495272_103495711	103495273	103495711	-1.04398	Promoter (<=1kb)	214	ENSG00000179088	C12orf42	protein_coding	chromosome 12 open reading frame 42
Chr16	16_57940098_57940457	57940099	57940457	-1.04398	Promoter (<=1kb)	-550	ENSG00000070729	CNGB1	protein_coding	cyclic nucleotide gated channel subunit beta 1
Chr22	22_43543402_43543790	43543403	43543790	-1.04398	Intron	-9898	ENSG00000186976	EFCAB6	protein_coding	EF-hand calcium binding domain 6
Chr12	12_32525651_32526162	32525652	32526162	-1.04398	Intron	-8162	ENSG00000139132	FGD4	protein_coding	FYVE, RhoGEF and PH domain containing 4
Chr14	14_106790504_106791114	106790505	106791114	-1.04398	Promoter (<=1kb)	119	ENSG00000225698	IGHV3-72	IG_V_gene	immunoglobulin heavy variable 3-72
Chr2	2_26693341_26693586	26693342	26693586	-1.04398	Promoter (<=1kb)	620	ENSG00000171303	KCNK3	protein_coding	potassium two pore domain channel subfamily K member 3
Chr12	12_115943549_115943928	115943550	115943928	-1.04398	Distal Intergenic	16604	ENSG00000123066	MED13L	protein_coding	mediator complex subunit 13L
Chr20	20_31836059_31836321	31836060	31836321	-1.04398	Distal Intergenic	9283	ENSG00000101306	MYLK2	protein_coding	myosin light chain kinase 2
Chr22	22_25774647_25774949	25774648	25774949	-1.04398	Intron	4621	ENSG00000133454	MYO18B	protein_coding	myosin XVIIIB
Chr1	1_113972986_113973316	113972987	113973316	-1.04398	Exon	-6075	ENSG00000116774	OLFML3	protein_coding	olfactomedin like 3
Chr17	17_17529139_17529448	17529140	17529448	-1.04398	Intron	-10060	ENSG00000133027	PEMT	protein_coding	phosphatidylethanolamine N-methyltransferase
Chr22	22_35734888_35735234	35734889	35735234	-1.04398	Distal Intergenic	13398	ENSG00000100320	RBFOX2	protein_coding	RNA binding fox-1 homolog 2
Chr14	14_20506555_20506953	20506556	20506953	-1.04398	Promoter (1-2kb)	1019	ENSG00000182545	RNASE10	protein_coding	ribonuclease A family member 10 (inactive)
Chr1	1_23688616_23688839	23688617	23688839	-1.04398	Promoter (2-3kb)	-2903	ENSG00000142676	RPL11	protein_coding	ribosomal protein L11
Chr17	17_29005003_29005203	29005004	29005203	-1.04398	Promoter (<=1kb)	710	ENSG00000063015	SEZ6	protein_coding	seizure related 6 homolog
Chr5	5_150204967_150205281	150204968	150205281	-1.04398	Intron	14717	ENSG00000011083	SLC6A7	protein_coding	solute carrier family 6 member 7
Chr15	15_101709357_101709798	101709358	101709798	-1.04398	Promoter (<=1kb)	-530	ENSG00000185418	TARS3	protein_coding	threonyl-tRNA synthetase 3
Chr1	1_6245799_6246033	6245800	6246033	-1.0466	Promoter (1-2kb)	1621	ENSG00000173673	HES3	protein_coding	hes family bHLH transcription factor 3
ChrX	X_155057470_155058077	155057471	155058077	-1.0485	3' UTR	7291	ENSG00000182712	CMC4	protein_coding	C-X9-C motif containing 4
Chr2	2_162234827_162235474	162234828	162235474	-1.0485	Intron	7574	ENSG00000078098	FAP	protein_coding	fibroblast activation protein alpha
Chr19	19_45290562_45290938	45290563	45290938	-1.0485	Intron	10418	ENSG00000007047	MARK4	protein_coding	microtubule affinity regulating kinase 4
Chr10	10_110331371_110331956	110331372	110331956	-1.0485	Distal Intergenic	-26434	ENSG00000119953	SMNDC1	protein_coding	survival motor neuron domain containing 1
Chr11	11_66022519_66023126	66022520	66023126	-1.04994	Promoter (1-2kb)	-1306	ENSG00000175294	CATSPER1	protein_coding	cation channel sperm associated 1
Chr10	10_125145224_125145594	125145225	125145594	-1.05107	Intron	-6975	ENSG00000175029	CTBP2	protein_coding	C-terminal binding protein 2
Chr19	19_8268722_8269398	8268723	8269398	-1.05476	Distal Intergenic	7096	ENSG00000090661	CERS4	protein_coding	ceramide synthase 4
Chr17	17_30914653_30914853	30914654	30914853	-1.06047	Intron	-6827	ENSG00000184060	ADAP2	protein_coding	ArfGAP with dual PH domains 2
Chr4	4_73170458_73170658	73170459	73170658	-1.06047	Intron	-16524	ENSG00000132466	ANKRD17	protein_coding	ankyrin repeat domain 17
Chr5	5_160873533_160873906	160873534	160873906	-1.06047	Distal Intergenic	-21320	ENSG00000118322	ATP10B	protein_coding	ATPase phospholipid transporting 10B (putative)
Chr3	3_113770391_113770591	113770392	113770591	-1.06047	Promoter (1-2kb)	1768	ENSG00000114573	ATP6V1A	protein_coding	ATPase H+ transporting V1 subunit A
Chr3	3_46967133_46967420	46967134	46967420	-1.06047	Intron	9017	ENSG00000160799	CCDC12	protein_coding	coiled-coil domain containing 12
Chr7	7_45016213_45016477	45016214	45016477	-1.06047	Intron	-10538	ENSG00000136280	CCM2	protein_coding	CCM2 scaffold protein
Chr3	3_32377316_32377516	32377317	32377516	-1.06047	Distal Intergenic	-14182	ENSG00000153551	CMTM7	protein_coding	CKLF like MARVEL transmembrane domain containing 7
Chr9	9_34598850_34599110	34598851	34599110	-1.06047	Distal Intergenic	-8711	ENSG00000122756	CNTFR	protein_coding	ciliary neurotrophic factor receptor
Chr13	13_110222006_110222504	110222007	110222504	-1.06047	Intron	-9421	ENSG00000187498	COL4A1	protein_coding	collagen type IV alpha 1 chain
Chr1	1_70416708_70416908	70416709	70416908	-1.06047	Intron	5326	ENSG00000116761	CTH	protein_coding	cystathionine gamma-lyase
Chr7	7_6304584_6304784	6304585	6304784	-1.06047	Distal Intergenic	-31941	ENSG00000008256	CYTH3	protein_coding	cytohesin 3
Chr3	3_51491969_51492191	51491970	51492191	-1.06047	Intron	7803	ENSG00000145041	DCAF1	protein_coding	DDB1 and CUL4 associated factor 1
Chr14	14_100166204_100166437	100166205	100166437	-1.06047	Distal Intergenic	-6560	ENSG00000168350	DEGS2	protein_coding	delta 4-desaturase, sphingolipid 2
Chr8	8_28601234_28601434	28601235	28601434	-1.06047	Promoter (<=1kb)	766	ENSG00000012232	EXTL3	protein_coding	exostosin like glycosyltransferase 3
Chr1	1_28001571_28001771	28001572	28001771	-1.06047	Intron	9315	ENSG00000158161	EYA3	protein_coding	EYA transcriptional coactivator and phosphatase 3
Chr1	1_161015261_161015461	161015262	161015461	-1.06047	Intron	5635	ENSG00000158769	F11R	protein_coding	F11 receptor
Chr2	2_201300131_201300331	201300132	201300331	-1.06047	Intron	8918	ENSG00000155749	FLACC1	protein_coding	flagellum associated containing coiled-coil domains 1
Chr1	1_92279641_92279949	92279642	92279949	-1.06047	Intron	6643	ENSG00000174842	GLMN	protein_coding	glomulin, FKBP associated protein
Chr1	1_167066662_167066863	167066663	167066863	-1.06047	Intron	11856	ENSG00000143167	GPA33	protein_coding	glycoprotein A33
Chr1	1_91338614_91338814	91338615	91338814	-1.06047	Intron	8635	ENSG00000162669	HFM1	protein_coding	helicase for meiosis 1
Chr1	1_186162819_186163115	186162820	186163115	-1.06047	Intron	-8272	ENSG00000143341	HMCN1	protein_coding	hemicentin 1
Chr14	14_106011740_106011940	106011741	106011940	-1.06047	Promoter (<=1kb)	480	ENSG00000276775	IGHV4-4	IG_V_gene	immunoglobulin heavy variable 4-4
Chr16	16_70590975_70591216	70590976	70591216	-1.06047	Intron	11081	ENSG00000157368	IL34	protein_coding	interleukin 34
Chr19	19_50859577_50859777	50859578	50859777	-1.06047	Promoter (1-2kb)	-1791	ENSG00000167751	KLK2	protein_coding	kallikrein related peptidase 2
Chr17	17_41465611_41465811	41465612	41465811	-1.06047	Promoter (1-2kb)	1575	ENSG00000108759	KRT32	protein_coding	keratin 32
Chr1	1_21818844_21819197	21818845	21819197	-1.06047	Promoter (2-3kb)	-2300	ENSG00000187942	LDLRAD2	protein_coding	low density lipoprotein receptor class A domain containing 2
Chr14	14_92686516_92687079	92686517	92687079	-1.06047	3' UTR	17826	ENSG00000100600	LGMN	protein_coding	legumain
Chr10	10_75645298_75645571	75645299	75645571	-1.06047	Promoter (1-2kb)	-1938	ENSG00000148655	LRMDA	protein_coding	leucine rich melanocyte differentiation associated
Chr12	12_57173084_57173384	57173085	57173384	-1.06047	Exon	5640	ENSG00000123384	LRP1	protein_coding	LDL receptor related protein 1
Chr19	19_33202545_33202745	33202546	33202745	-1.06047	Promoter (1-2kb)	-1125	ENSG00000130881	LRP3	protein_coding	LDL receptor related protein 3
Chr2	2_237673355_237673578	237673356	237673578	-1.06047	Intron	-9826	ENSG00000124831	LRRFIP1	protein_coding	LRR binding FLII interacting protein 1
Chr4	4_79323532_79323732	79323533	79323732	-1.06047	Promoter (1-2kb)	1736	ENSG00000156269	NAA11	protein_coding	N-alpha-acetyltransferase 11, NatA catalytic subunit
Chr16	16_23583365_23583609	23583366	23583609	-1.06047	Intron	7544	ENSG00000004779	NDUFAB1	protein_coding	NADH:ubiquinone oxidoreductase subunit AB1
Chr7	7_140706806_140707119	140706807	140707119	-1.06047	Intron	4284	ENSG00000090266	NDUFB2	protein_coding	NADH:ubiquinone oxidoreductase subunit B2
Chr8	8_52895198_52895428	52895199	52895428	-1.06047	Distal Intergenic	-43754	ENSG00000288611	NPBWR1	protein_coding	neuropeptides B and W receptor 1
Chr11	11_6904914_6905185	6904915	6905185	-1.06047	Intron	-12415	ENSG00000166368	OR2D2	protein_coding	olfactory receptor family 2 subfamily D member 2
Chr7	7_143032225_143032425	143032226	143032425	-1.06047	Distal Intergenic	-5094	ENSG00000179468	OR9A2	protein_coding	olfactory receptor family 9 subfamily A member 2
Chr1	1_206935586_206935882	206935587	206935882	-1.06047	Exon	3584	ENSG00000162896	PIGR	protein_coding	polymeric immunoglobulin receptor
Chr12	12_81659439_81659683	81659440	81659683	-1.06047	Intron	17164	ENSG00000139220	PPFIA2	protein_coding	PTPRF interacting protein alpha 2
Chr19	19_49844306_49844534	49844307	49844534	-1.06047	Exon	-6201	ENSG00000104960	PTOV1	protein_coding	PTOV1 extended AT-hook containing adaptor protein
Chr17	17_40191709_40191927	40191710	40191927	-1.06047	Promoter (<=1kb)	240	ENSG00000108352	RAPGEFL1	protein_coding	Rap guanine nucleotide exchange factor like 1
Chr10	10_43243410_43243645	43243411	43243645	-1.06047	Intron	-13672	ENSG00000198915	RASGEF1A	protein_coding	RasGEF domain family member 1A
Chr11	11_6586548_6586748	6586549	6586748	-1.06047	Intron	14556	ENSG00000132275	RRP8	protein_coding	ribosomal RNA processing 8
Chr1	1_165428913_165429177	165428914	165429177	-1.06047	5' UTR	-3942	ENSG00000143171	RXRG	protein_coding	retinoid X receptor gamma
Chr6	6_158142608_158142808	158142609	158142808	-1.06047	Intron	10034	ENSG00000122335	SERAC1	protein_coding	serine active site containing 1
Chr13	13_29721635_29721967	29721636	29721967	-1.06047	Distal Intergenic	-125948	ENSG00000139514	SLC7A1	protein_coding	solute carrier family 7 member 1
Chr14	14_70188015_70188239	70188016	70188239	-1.06047	Promoter (<=1kb)	712	ENSG00000100678	SLC8A3	protein_coding	solute carrier family 8 member A3
Chr2	2_228251988_228252229	228251989	228252229	-1.06047	Distal Intergenic	-70302	ENSG00000153820	SPHKAP	protein_coding	SPHK1 interactor, AKAP domain containing
Chr2	2_201464831_201465098	201464832	201465098	-1.06047	Intron	-7759	ENSG00000082146	STRADB	protein_coding	STE20 related adaptor beta
Chr13	13_37070026_37070294	37070027	37070294	-1.06047	Distal Intergenic	-10314	ENSG00000102710	SUPT20H	protein_coding	SPT20 homolog, SAGA complex component
Chr21	21_42317942_42318247	42317943	42318247	-1.06047	Promoter (2-3kb)	-2534	ENSG00000160180	TFF3	protein_coding	trefoil factor 3
Chr15	15_101626385_101626585	101626386	101626585	-1.06047	Promoter (1-2kb)	-1409	ENSG00000184277	TM2D3	protein_coding	TM2 domain containing 3
Chr10	10_44903515_44903715	44903516	44903715	-1.06047	Intron	-7601	ENSG00000187783	TMEM72	protein_coding	transmembrane protein 72
Chr19	19_49200471_49200757	49200472	49200757	-1.06047	3' UTR	-9844	ENSG00000130529	TRPM4	protein_coding	transient receptor potential cation channel subfamily M member 4
Chr17	17_58308065_58308426	58308066	58308426	-1.06047	Promoter (<=1kb)	165	ENSG00000005379	TSPOAP1	protein_coding	TSPO associated protein 1
Chr19	19_10363920_10364215	10363921	10364215	-1.06047	Promoter (1-2kb)	1648	ENSG00000105397	TYK2	protein_coding	tyrosine kinase 2
Chr11	11_76060616_76060993	76060617	76060993	-1.06047	Intron	-54907	ENSG00000198382	UVRAG	protein_coding	UV radiation resistance associated
Chr17	17_59717075_59717275	59717076	59717275	-1.06047	Intron	9358	ENSG00000062716	VMP1	protein_coding	vacuole membrane protein 1
Chr16	16_87414190_87414391	87414191	87414391	-1.06047	Intron	3535	ENSG00000140948	ZCCHC14	protein_coding	zinc finger CCHC-type containing 14
Chr1	1_39900794_39901184	39900795	39901184	-1.06865	Promoter (<=1kb)	733	ENSG00000116990	MYCL	protein_coding	MYCL proto-oncogene, bHLH transcription factor
Chr19	19_49556532_49556749	49556533	49556749	-1.07353	Promoter (<=1kb)	546	ENSG00000142546	NOSIP	protein_coding	nitric oxide synthase interacting protein
Chr10	10_70903437_70903817	70903438	70903817	-1.07353	Intron	-14873	ENSG00000166228	PCBD1	protein_coding	pterin-4 alpha-carbinolamine dehydratase 1
Chr12	12_121773304_121773504	121773305	121773504	-1.07353	Promoter (2-3kb)	-2759	ENSG00000188735	TMEM120B	protein_coding	transmembrane protein 120B
Chr7	7_73324290_73324665	73324291	73324665	-1.07353	Promoter (<=1kb)	906	ENSG00000146755	TRIM50	protein_coding	tripartite motif containing 50
Chr5	5_180291267_180291760	180291268	180291760	-1.07458	Promoter (<=1kb)	207	ENSG00000050748	MAPK9	protein_coding	mitogen-activated protein kinase 9
Chr18	18_23641212_23641605	23641213	23641605	-1.07909	Intron	6392	ENSG00000154065	ANKRD29	protein_coding	ankyrin repeat domain 29
Chr19	19_49057782_49057982	49057783	49057982	-1.07909	Promoter (<=1kb)	-32	ENSG00000196337	CGB7	protein_coding	chorionic gonadotropin subunit beta 7
Chr9	9_98185532_98185956	98185533	98185956	-1.07909	Intron	6681	ENSG00000106789	CORO2A	protein_coding	coronin 2A
Chr1	1_225904992_225905234	225904993	225905234	-1.07909	Intron	6148	ENSG00000243709	LEFTY1	protein_coding	left-right determination factor 1
Chr10	10_124542819_124543067	124542820	124543067	-1.07909	Promoter (2-3kb)	-2917	ENSG00000107902	LHPP	protein_coding	phospholysine phosphohistidine inorganic pyrophosphate phosphatase
Chr2	2_127591578_127591778	127591579	127591778	-1.07909	Intron	-28204	ENSG00000169994	MYO7B	protein_coding	myosin VIIB
Chr2	2_7008160_7008599	7008161	7008599	-1.07909	Intron	11221	ENSG00000151692	RNF144A	protein_coding	ring finger protein 144A
Chr17	17_50495250_50495649	50495251	50495649	-1.07909	Distal Intergenic	11222	ENSG00000136444	RSAD1	protein_coding	radical S-adenosyl methionine domain containing 1
Chr4	4_76180001_76180398	76180002	76180398	-1.07909	Promoter (<=1kb)	-293	ENSG00000138760	SCARB2	protein_coding	scavenger receptor class B member 2
Chr4	4_8206298_8206498	8206299	8206498	-1.07909	Promoter (1-2kb)	1104	ENSG00000125089	SH3TC1	protein_coding	SH3 domain and tetratricopeptide repeats 1
Chr7	7_130050050_130050281	130050051	130050281	-1.07909	Promoter (1-2kb)	1088	ENSG00000091732	ZC3HC1	protein_coding	zinc finger C3HC-type containing 1
Chr10	10_133302342_133302816	133302343	133302816	-1.08217	Promoter (<=1kb)	165	ENSG00000130640	TUBGCP2	protein_coding	tubulin gamma complex component 2
Chr1	1_3502010_3502296	3502011	3502296	-1.08412	Intron	-5294	ENSG00000162591	MEGF6	protein_coding	multiple EGF like domains 6
Chr19	19_35845539_35845941	35845540	35845941	-1.08412	Promoter (<=1kb)	-30	ENSG00000161270	NPHS1	protein_coding	NPHS1 adhesion molecule, nephrin
ChrX	X_129850689_129851300	129850690	129851300	-1.08412	Distal Intergenic	-6781	ENSG00000188706	ZDHHC9	protein_coding	zinc finger DHHC-type palmitoyltransferase 9
Chr17	17_37067798_37068019	37067799	37068019	-1.09289	Distal Intergenic	12972	ENSG00000275700	AATF	protein_coding	apoptosis antagonizing transcription factor
Chr18	18_24149852_24150082	24149853	24150082	-1.09289	Promoter (2-3kb)	-2562	ENSG00000154040	CABYR	protein_coding	calcium binding tyrosine phosphorylation regulated
Chr11	11_105016560_105016939	105016561	105016939	-1.09289	Intron	6197	ENSG00000137757	CASP5	protein_coding	caspase 5
Chr6	6_112043606_112043920	112043607	112043920	-1.09289	Distal Intergenic	-10155	ENSG00000112761	CCN6	protein_coding	cellular communication network factor 6
Chr18	18_69839616_69839834	69839617	69839834	-1.09289	Intron	55975	ENSG00000150637	CD226	protein_coding	CD226 molecule
Chr5	5_76806669_76806869	76806670	76806869	-1.09289	Distal Intergenic	-12064	ENSG00000164251	F2RL1	protein_coding	F2R like trypsin receptor 1
Chr4	4_53466545_53466755	53466546	53466755	-1.09289	Intron	7995	ENSG00000145216	FIP1L1	protein_coding	factor interacting with PAPOLA and CPSF1
ChrX	X_107483866_107484213	107483867	107484213	-1.09289	Intron	-22699	ENSG00000147234	FRMPD3	protein_coding	FERM and PDZ domain containing 3
Chr6	6_39075050_39075250	39075051	39075250	-1.09289	Intron	26270	ENSG00000112164	GLP1R	protein_coding	glucagon like peptide 1 receptor
Chr19	19_3100966_3101440	3100967	3101440	-1.09289	Intron	6318	ENSG00000088256	GNA11	protein_coding	G protein subunit alpha 11
Chr10	10_25520908_25521144	25520909	25521144	-1.09289	Intron	54719	ENSG00000151025	GPR158	protein_coding	G protein-coupled receptor 158
Chr9	9_137161442_137161730	137161443	137161730	-1.09289	Promoter (<=1kb)	-976	ENSG00000176884	GRIN1	protein_coding	glutamate ionotropic receptor NMDA type subunit 1
Chr2	2_27481645_27481845	27481646	27481845	-1.09289	Intron	3582	ENSG00000138002	IFT172	protein_coding	intraflagellar transport 172
Chr17	17_49004159_49004359	49004160	49004359	-1.09289	Intron	6397	ENSG00000159217	IGF2BP1	protein_coding	insulin like growth factor 2 mRNA binding protein 1
Chr7	7_111609535_111609823	111609536	111609823	-1.09289	Distal Intergenic	-47019	ENSG00000184903	IMMP2L	protein_coding	inner mitochondrial membrane peptidase subunit 2
Chr10	10_119818072_119818404	119818073	119818404	-1.09289	Promoter (<=1kb)	-282	ENSG00000198825	INPP5F	protein_coding	inositol polyphosphate-5-phosphatase F
Chr1	1_233666630_233666895	233666631	233666895	-1.09289	Exon	10936	ENSG00000135750	KCNK1	protein_coding	potassium two pore domain channel subfamily K member 1
Chr12	12_12328630_12328913	12328631	12328913	-1.09289	3' UTR	9761	ENSG00000111261	MANSC1	protein_coding	MANSC domain containing 1
Chr5	5_126854987_126855187	126854988	126855187	-1.09289	Distal Intergenic	23210	ENSG00000173926	MARCHF3	protein_coding	membrane associated ring-CH-type finger 3
Chr17	17_8798759_8798959	8798760	8798959	-1.09289	Promoter (<=1kb)	406	ENSG00000185156	MFSD6L	protein_coding	major facilitator superfamily domain containing 6 like
Chr17	17_18139804_18140081	18139805	18140081	-1.09289	Promoter (<=1kb)	531	ENSG00000091536	MYO15A	protein_coding	myosin XVA
Chr4	4_72094464_72094664	72094465	72094664	-1.09289	Intron	-51866	ENSG00000056291	NPFFR2	protein_coding	neuropeptide FF receptor 2
Chr7	7_108164023_108164223	108164024	108164223	-1.09289	Intron	-7387	ENSG00000091129	NRCAM	protein_coding	neuronal cell adhesion molecule
ChrX	X_78934983_78935228	78934984	78935228	-1.09289	Distal Intergenic	-10104	ENSG00000078589	P2RY10	protein_coding	P2Y receptor family member 10
Chr22	22_42947643_42947853	42947644	42947853	-1.09289	Promoter (<=1kb)	-603	ENSG00000100266	PACSIN2	protein_coding	protein kinase C and casein kinase substrate in neurons 2
Chr5	5_31854378_31854625	31854379	31854625	-1.09289	Promoter (<=1kb)	-312	ENSG00000133401	PDZD2	protein_coding	PDZ domain containing 2
Chr19	19_42091821_42092132	42091822	42092132	-1.09289	3' UTR	3273	ENSG00000028277	POU2F2	protein_coding	POU class 2 homeobox 2
Chr3	3_64147010_64147226	64147011	64147226	-1.09289	Exon	7810	ENSG00000163637	PRICKLE2	protein_coding	prickle planar cell polarity protein 2
Chr3	3_47394904_47395323	47394905	47395323	-1.09289	Intron	-9957	ENSG00000076201	PTPN23	protein_coding	protein tyrosine phosphatase non-receptor type 23
Chr3	3_24662910_24663232	24662911	24663232	-1.09289	Intron	-24655	ENSG00000077092	RARB	protein_coding	retinoic acid receptor beta
Chr7	7_102604960_102605326	102604961	102605326	-1.09289	Promoter (<=1kb)	851	ENSG00000105808	RASA4	protein_coding	RAS p21 protein activator 4
Chr1	1_41046445_41046645	41046446	41046645	-1.09289	Promoter (<=1kb)	24	ENSG00000010803	SCMH1	protein_coding	Scm polycomb group protein homolog 1
Chr3	3_10894084_10894284	10894085	10894284	-1.09289	Intron	-39682	ENSG00000132164	SLC6A11	protein_coding	solute carrier family 6 member 11
Chr2	2_234035807_234036077	234035808	234036077	-1.09289	Distal Intergenic	-14602	ENSG00000072080	SPP2	protein_coding	secreted phosphoprotein 2
Chr5	5_142295509_142295709	142295510	142295709	-1.09289	Distal Intergenic	20081	ENSG00000187678	SPRY4	protein_coding	sprouty RTK signaling antagonist 4
ChrX	X_119539363_119539563	119539364	119539563	-1.09289	3' UTR	3204	ENSG00000018610	STEEP1	protein_coding	STING1 ER exit protein 1
Chr15	15_43610851_43611083	43610852	43611083	-1.09289	Promoter (1-2kb)	1937	ENSG00000242866	STRC	protein_coding	stereocilin
Chr15	15_71629256_71629456	71629257	71629456	-1.09289	Intron	-30999	ENSG00000187720	THSD4	protein_coding	thrombospondin type 1 domain containing 4
Chr17	17_741317_741638	741318	741638	-1.09289	Promoter (<=1kb)	-26	ENSG00000167695	TLCD3A	protein_coding	TLC domain containing 3A
Chr1	1_32906696_32906896	32906697	32906896	-1.09289	Distal Intergenic	-5259	ENSG00000121900	TMEM54	protein_coding	transmembrane protein 54
Chr18	18_31957107_31957445	31957108	31957445	-1.09289	Distal Intergenic	-3972	ENSG00000153339	TRAPPC8	protein_coding	trafficking protein particle complex subunit 8
Chr18	18_25267037_25267237	25267038	25267237	-1.09289	Intron	34797	ENSG00000198795	ZNF521	protein_coding	zinc finger protein 521
Chr15	15_66513590_66513790	66513591	66513790	-1.09289	Intron	-6718	ENSG00000174442	ZWILCH	protein_coding	zwilch kinetochore protein
ChrX	X_53287556_53288040	53287557	53288040	-1.10027	Intron	3876	ENSG00000124313	IQSEC2	protein_coding	IQ motif and Sec7 domain ArfGEF 2
Chr1	1_225442930_225443244	225442931	225443244	-1.10027	Distal Intergenic	-14006	ENSG00000143815	LBR	protein_coding	lamin B receptor
Chr20	20_25309540_25309803	25309541	25309803	-1.10354	Promoter (<=1kb)	-43	ENSG00000100997	ABHD12	protein_coding	abhydrolase domain containing 12, lysophospholipase
Chr16	16_4011205_4011529	4011206	4011529	-1.10354	Intron	4153	ENSG00000162104	ADCY9	protein_coding	adenylate cyclase 9
Chr10	10_114044044_114044395	114044045	114044395	-1.10354	Promoter (<=1kb)	179	ENSG00000043591	ADRB1	protein_coding	adrenoceptor beta 1
Chr19	19_6693830_6694065	6693831	6694065	-1.10354	Promoter (<=1kb)	-748	ENSG00000125730	C3	protein_coding	complement C3
Chr15	15_72169511_72169779	72169512	72169779	-1.10354	Promoter (<=1kb)	295	ENSG00000175318	GRAMD2A	protein_coding	GRAM domain containing 2A
Chr19	19_49546222_49546577	49546223	49546577	-1.10354	Intron	3621	ENSG00000142552	RCN3	protein_coding	reticulocalbin 3
Chr17	17_38606027_38606388	38606028	38606388	-1.10354	Promoter (<=1kb)	-76	ENSG00000277363	SRCIN1	protein_coding	SRC kinase signaling inhibitor 1
Chr22	22_41340064_41340362	41340065	41340362	-1.10354	Exon	-26971	ENSG00000167074	TEF	protein_coding	TEF transcription factor, PAR bZIP family member
Chr10	10_86454472_86455088	86454473	86455088	-1.10354	Intron	-10441	ENSG00000062650	WAPL	protein_coding	WAPL cohesin release factor
Chr19	19_3249425_3249705	3249426	3249705	-1.10657	Intron	-20909	ENSG00000161082	CELF5	protein_coding	CUGBP Elav-like family member 5
ChrX	X_115260003_115260478	115260004	115260478	-1.10657	Distal Intergenic	-25908	ENSG00000130224	LRCH2	protein_coding	leucine rich repeats and calponin homology domain containing 2
Chr10	10_99838965_99839218	99838966	99839218	-1.112	Intron	-4492	ENSG00000023839	ABCC2	protein_coding	ATP binding cassette subfamily C member 2
ChrX	X_109671159_109671529	109671160	109671529	-1.112	Promoter (2-3kb)	-2051	ENSG00000068366	ACSL4	protein_coding	acyl-CoA synthetase long chain family member 4
Chr10	10_47523649_47524006	47523650	47524006	-1.112	Promoter (<=1kb)	-12	ENSG00000204172	AGAP9	protein_coding	ArfGAP with GTPase domain, ankyrin repeat and PH domain 9
Chr5	5_173187109_173187668	173187110	173187668	-1.112	Distal Intergenic	27134	ENSG00000113734	BNIP1	protein_coding	BCL2 interacting protein 1
Chr19	19_47307921_47308121	47307922	47308121	-1.112	Promoter (1-2kb)	-1740	ENSG00000197405	C5AR1	protein_coding	complement C5a receptor 1
Chr11	11_61027028_61027307	61027029	61027307	-1.112	Distal Intergenic	10126	ENSG00000013725	CD6	protein_coding	CD6 molecule
Chr3	3_198022_198303	198023	198303	-1.112	Promoter (<=1kb)	9	ENSG00000134121	CHL1	protein_coding	cell adhesion molecule L1 like
Chr16	16_28486519_28486720	28486520	28486720	-1.112	Promoter (<=1kb)	-157	ENSG00000188603	CLN3	protein_coding	CLN3 lysosomal/endosomal transmembrane protein, battenin
Chr20	20_23686223_23686423	23686224	23686423	-1.112	Promoter (2-3kb)	2615	ENSG00000101441	CST4	protein_coding	cystatin S
Chr10	10_122847141_122847509	122847142	122847509	-1.112	Promoter (<=1kb)	-967	ENSG00000138161	CUZD1	protein_coding	CUB and zona pellucida like domains 1
Chr3	3_128279253_128279464	128279254	128279464	-1.112	Intron	-57440	ENSG00000132394	EEFSEC	protein_coding	eukaryotic elongation factor, selenocysteine-tRNA specific
Chr3	3_97424960_97425322	97424961	97425322	-1.112	Intron	-14288	ENSG00000080224	EPHA6	protein_coding	EPH receptor A6
Chr12	12_49897485_49897685	49897486	49897685	-1.112	Promoter (<=1kb)	-417	ENSG00000135472	FAIM2	protein_coding	Fas apoptotic inhibitory molecule 2
Chr10	10_87080918_87081289	87080919	87081289	-1.112	Promoter (1-2kb)	-1036	ENSG00000148672	GLUD1	protein_coding	glutamate dehydrogenase 1
Chr10	10_23695691_23696019	23695692	23696019	-1.112	Promoter (<=1kb)	910	ENSG00000120549	KIAA1217	protein_coding	KIAA1217
Chr2	2_159775854_159776221	159775855	159776221	-1.112	Intron	16563	ENSG00000136536	MARCHF7	protein_coding	membrane associated ring-CH-type finger 7
Chr22	22_40501895_40502143	40501896	40502143	-1.112	Intron	-9589	ENSG00000196588	MRTFA	protein_coding	myocardin related transcription factor A
Chr7	7_101665872_101666138	101665873	101666138	-1.112	Distal Intergenic	-36577	ENSG00000106436	MYL10	protein_coding	myosin light chain 10
Chr21	21_39908404_39908609	39908405	39908609	-1.112	Intron	9929	ENSG00000183036	PCP4	protein_coding	Purkinje cell protein 4
Chr19	19_17377379_17377616	17377380	17377616	-1.112	Promoter (<=1kb)	-38	ENSG00000130300	PLVAP	protein_coding	plasmalemma vesicle associated protein
Chr17	17_43994285_43994485	43994286	43994485	-1.112	Intron	9984	ENSG00000131096	PYY	protein_coding	peptide YY
ChrX	X_102918537_102918894	102918538	102918894	-1.112	Distal Intergenic	-18378	ENSG00000102128	RAB40AL	protein_coding	RAB40A like
Chr16	16_618844_619326	618845	619326	-1.112	Promoter (2-3kb)	2200	ENSG00000197562	RAB40C	protein_coding	RAB40C, member RAS oncogene family
Chr6	6_166944623_166945150	166944624	166945150	-1.112	Promoter (<=1kb)	-227	ENSG00000026297	RNASET2	protein_coding	ribonuclease T2
Chr1	1_67422991_67423380	67422992	67423380	-1.112	Promoter (1-2kb)	1034	ENSG00000142864	SERBP1	protein_coding	SERPINE1 mRNA binding protein 1
Chr2	2_84389873_84390140	84389874	84390140	-1.112	Distal Intergenic	36796	ENSG00000163541	SUCLG1	protein_coding	succinate-CoA ligase GDP/ADP-forming subunit alpha
Chr5	5_69361211_69361467	69361212	69361467	-1.112	Intron	5354	ENSG00000273841	TAF9	protein_coding	TATA-box binding protein associated factor 9
Chr19	19_55331154_55331354	55331155	55331354	-1.112	Promoter (2-3kb)	2694	ENSG00000180061	TMEM150B	protein_coding	transmembrane protein 150B
Chr11	11_60873201_60873561	60873202	60873561	-1.112	Promoter (<=1kb)	77	ENSG00000149506	ZP1	protein_coding	zona pellucida glycoprotein 1
Chr10	10_129969225_129969425	129969226	129969425	-1.11889	Intron	3628	ENSG00000108001	EBF3	protein_coding	EBF transcription factor 3
Chr4	4_171903091_171903727	171903092	171903727	-1.11889	Intron	89569	ENSG00000174473	GALNTL6	protein_coding	polypeptide N-acetylgalactosaminyltransferase like 6
Chr18	18_59265259_59265841	59265260	59265841	-1.11889	Downstream (1-2kb)	7079	ENSG00000134438	RAX	protein_coding	retina and anterior neural fold homeobox
Chr19	19_46016710_46017009	46016711	46017009	-1.12091	Promoter (1-2kb)	-1370	ENSG00000104983	CCDC61	protein_coding	coiled-coil domain containing 61
Chr10	10_688814_689236	688815	689236	-1.12091	Promoter (<=1kb)	432	ENSG00000151240	DIP2C	protein_coding	disco interacting protein 2 homolog C
Chr10	10_91163694_91164408	91163695	91164408	-1.12091	Promoter (<=1kb)	683	ENSG00000180628	PCGF5	protein_coding	polycomb group ring finger 5
Chr17	17_4639344_4639559	4639345	4639559	-1.1246	Promoter (<=1kb)	-181	ENSG00000161905	ALOX15	protein_coding	arachidonate 15-lipoxygenase
Chr17	17_65865814_65866098	65865815	65866098	-1.1246	Intron	7550	ENSG00000154240	CEP112	protein_coding	centrosomal protein 112
Chr1	1_53903010_53903342	53903011	53903342	-1.1246	Exon	8800	ENSG00000211452	DIO1	protein_coding	iodothyronine deiodinase 1
Chr22	22_46635814_46636070	46635815	46636070	-1.1246	Intron	8972	ENSG00000075240	GRAMD4	protein_coding	GRAM domain containing 4
Chr22	22_37462888_37463172	37462889	37463172	-1.1246	Distal Intergenic	9552	ENSG00000100060	MFNG	protein_coding	MFNG O-fucosylpeptide 3-beta-N-acetylglucosaminyltransferase
Chr7	7_4940294_4940569	4940295	4940569	-1.1246	Intron	18618	ENSG00000136297	MMD2	protein_coding	monocyte to macrophage differentiation associated 2
Chr22	22_27811104_27811304	27811105	27811304	-1.1246	Distal Intergenic	-9349	ENSG00000169184	MN1	protein_coding	MN1 proto-oncogene, transcriptional regulator
Chr1	1_171600970_171601273	171600971	171601273	-1.1246	Promoter (<=1kb)	350	ENSG00000283683	MYOCOS	protein_coding	myocilin opposite strand
Chr6	6_34397770_34398030	34397771	34398030	-1.1246	Intron	-5102	ENSG00000272325	NUDT3	protein_coding	nudix hydrolase 3
Chr20	20_4136557_4136778	4136558	4136778	-1.1246	Intron	-12001	ENSG00000088826	SMOX	protein_coding	spermine oxidase
Chr1	1_231317351_231317592	231317352	231317592	-1.1246	Distal Intergenic	-19512	ENSG00000010072	SPRTN	protein_coding	SprT-like N-terminal domain
Chr20	20_47770874_47771197	47770875	47771197	-1.1246	Intron	-13544	ENSG00000196562	SULF2	protein_coding	sulfatase 2
Chr12	12_111034511_111035155	111034512	111035155	-1.12942	Promoter (<=1kb)	347	ENSG00000111249	CUX2	protein_coding	cut like homeobox 2
Chr1	1_6486514_6486718	6486515	6486718	-1.12942	Promoter (<=1kb)	-561	ENSG00000171680	PLEKHG5	protein_coding	pleckstrin homology and RhoGEF domain containing G5
Chr19	19_55400824_55401048	55400825	55401048	-1.12942	3' UTR	3096	ENSG00000108106	UBE2S	protein_coding	ubiquitin conjugating enzyme E2 S
Chr9	9_133557335_133557540	133557336	133557540	-1.13354	Intron	22483	ENSG00000197859	ADAMTSL2	protein_coding	ADAMTS like 2
Chr17	17_65554684_65554884	65554685	65554884	-1.13354	Intron	3845	ENSG00000168646	AXIN2	protein_coding	axin 2
Chr11	11_116731228_116731511	116731229	116731511	-1.13354	Distal Intergenic	31325	ENSG00000137656	BUD13	protein_coding	BUD13 homolog
Chr8	8_60229227_60229717	60229228	60229717	-1.13354	Promoter (2-3kb)	2956	ENSG00000178538	CA8	protein_coding	carbonic anhydrase 8
Chr16	16_30169270_30169628	30169271	30169628	-1.13354	Distal Intergenic	-13199	ENSG00000102879	CORO1A	protein_coding	coronin 1A
Chr22	22_36913737_36914163	36913738	36914163	-1.13354	Promoter (<=1kb)	110	ENSG00000100368	CSF2RB	protein_coding	colony stimulating factor 2 receptor subunit beta
Chr6	6_43220741_43221037	43220742	43221037	-1.13354	Promoter (<=1kb)	176	ENSG00000112659	CUL9	protein_coding	cullin 9
Chr19	19_11261689_11261889	11261690	11261889	-1.13354	Promoter (<=1kb)	551	ENSG00000130158	DOCK6	protein_coding	dedicator of cytokinesis 6
Chr7	7_158878751_158879073	158878752	158879073	-1.13354	Promoter (<=1kb)	-707	ENSG00000126870	DYNC2I1	protein_coding	dynein 2 intermediate chain 1
Chr1	1_23216815_23217243	23216816	23217243	-1.13354	Promoter (<=1kb)	259	ENSG00000179546	HTR1D	protein_coding	5-hydroxytryptamine receptor 1D
Chr5	5_55438615_55438964	55438616	55438964	-1.13354	Intron	22560	ENSG00000039123	MTREX	protein_coding	Mtr4 exosome RNA helicase
Chr2	2_233348119_233348487	233348120	233348487	-1.13354	Downstream (2-3kb)	4432	ENSG00000130561	SAG	protein_coding	S-antigen visual arrestin
Chr11	11_65592026_65592435	65592027	65592435	-1.13596	Promoter (<=1kb)	205	ENSG00000173442	EHBP1L1	protein_coding	EH domain binding protein 1 like 1
Chr9	9_133406883_133407458	133406884	133407458	-1.1402	3' UTR	-6900	ENSG00000160323	ADAMTS13	protein_coding	ADAM metallopeptidase with thrombospondin type 1 motif 13
ChrX	X_130810722_130811247	130810723	130811247	-1.1402	Intron	91945	ENSG00000165675	ENOX2	protein_coding	ecto-NOX disulfide-thiol exchanger 2
Chr11	11_123580684_123580884	123580685	123580884	-1.1402	Intron	-10203	ENSG00000023171	GRAMD1B	protein_coding	GRAM domain containing 1B
Chr6	6_30942695_30942966	30942696	30942966	-1.1402	Promoter (1-2kb)	1723	ENSG00000168631	MUCL3	protein_coding	mucin like 3
Chr19	19_6021967_6022284	6021968	6022284	-1.1402	Promoter (<=1kb)	921	ENSG00000087903	RFX2	protein_coding	regulatory factor X2
Chr14	14_92632935_92633400	92632936	92633400	-1.1402	Intron	17463	ENSG00000100599	RIN3	protein_coding	Ras and Rab interactor 3
Chr18	18_48937497_48937697	48937498	48937697	-1.1402	Intron	-3776	ENSG00000101665	SMAD7	protein_coding	SMAD family member 7
Chr10	10_77898574_77899043	77898575	77899043	-1.14536	Intron	-9068	ENSG00000151208	DLG5	protein_coding	discs large MAGUK scaffold protein 5
Chr2	2_74536339_74536650	74536340	74536650	-1.14536	Exon	5690	ENSG00000115317	HTRA2	protein_coding	HtrA serine peptidase 2
Chr21	21_29155363_29155884	29155364	29155884	-1.14536	Intron	9805	ENSG00000156265	MAP3K7CL	protein_coding	MAP3K7 C-terminal like
Chr4	4_163189405_163190190	163189406	163190190	-1.14536	Distal Intergenic	-22516	ENSG00000145414	NAF1	protein_coding	nuclear assembly factor 1 ribonucleoprotein
Chr19	19_52269617_52270160	52269618	52270160	-1.14536	Promoter (<=1kb)	25	ENSG00000196214	ZNF766	protein_coding	zinc finger protein 766
Chr1	1_33289061_33289571	33289062	33289571	-1.14948	Intron	8712	ENSG00000160094	ZNF362	protein_coding	zinc finger protein 362
Chr4	4_6470706_6471013	6470707	6471013	-1.15284	Promoter (<=1kb)	673	ENSG00000074211	PPP2R2C	protein_coding	protein phosphatase 2 regulatory subunit Bgamma
Chr11	11_62974769_62975416	62974770	62975416	-1.15284	Intron	8476	ENSG00000197901	SLC22A6	protein_coding	solute carrier family 22 member 6
Chr4	4_48017048_48017557	48017049	48017557	-1.15563	Promoter (<=1kb)	239	ENSG00000163293	NIPAL1	protein_coding	NIPA like domain containing 1
Chr10	10_96719850_96720206	96719851	96720206	-1.15799	Promoter (<=1kb)	308	ENSG00000155629	PIK3AP1	protein_coding	phosphoinositide-3-kinase adaptor protein 1
Chr10	10_35549342_35549859	35549343	35549859	-1.16463	Intron	19147	ENSG00000108100	CCNY	protein_coding	cyclin Y
Chr2	2_96772110_96772791	96772111	96772791	-1.16689	Intron	11209	ENSG00000158158	CNNM4	protein_coding	cyclin and CBS domain divalent metal cation transport mediator 4
Chr3	3_132606594_132606794	132606595	132606794	-1.186	Promoter (1-2kb)	-1432	ENSG00000240303	ACAD11	protein_coding	acyl-CoA dehydrogenase family member 11
Chr5	5_179344209_179344464	179344210	179344464	-1.186	Promoter (<=1kb)	966	ENSG00000087116	ADAMTS2	protein_coding	ADAM metallopeptidase with thrombospondin type 1 motif 2
Chr12	12_19460547_19460779	19460548	19460779	-1.186	Promoter (1-2kb)	-1747	ENSG00000139154	AEBP2	protein_coding	AE binding protein 2
Chr6	6_108508979_108509179	108508980	108509179	-1.186	Intron	-13958	ENSG00000135537	AFG1L	protein_coding	AFG1 like ATPase
Chr17	17_57099609_57099942	57099610	57099942	-1.186	Promoter (1-2kb)	1173	ENSG00000121057	AKAP1	protein_coding	A-kinase anchoring protein 1
Chr12	12_111775182_111775382	111775183	111775382	-1.186	Intron	8235	ENSG00000111275	ALDH2	protein_coding	aldehyde dehydrogenase 2 family member
Chr3	3_56916128_56916329	56916129	56916329	-1.186	Promoter (<=1kb)	142	ENSG00000163947	ARHGEF3	protein_coding	Rho guanine nucleotide exchange factor 3
Chr19	19_3881695_3881977	3881696	3881977	-1.186	Promoter (1-2kb)	1011	ENSG00000167654	ATCAY	protein_coding	ATCAY kinesin light chain interacting caytaxin
Chr19	19_41218965_41219165	41218966	41219165	-1.186	Promoter (<=1kb)	-58	ENSG00000167601	AXL	protein_coding	AXL receptor tyrosine kinase
Chr12	12_56601743_56602053	56601744	56602053	-1.186	Promoter (<=1kb)	-117	ENSG00000076108	BAZ2A	protein_coding	bromodomain adjacent to zinc finger domain 2A
Chr2	2_60479106_60479306	60479107	60479306	-1.186	Intron	5159	ENSG00000119866	BCL11A	protein_coding	BCL11 transcription factor A
Chr9	9_16828913_16829113	16828914	16829113	-1.186	Intron	38579	ENSG00000173068	BNC2	protein_coding	basonuclin zinc finger protein 2
Chr14	14_96052294_96052494	96052295	96052494	-1.186	Intron	12911	ENSG00000227051	C14orf132	protein_coding	chromosome 14 open reading frame 132
Chr6	6_44187446_44187646	44187447	44187646	-1.186	Distal Intergenic	10831	ENSG00000137225	CAPN11	protein_coding	calpain 11
ChrX	X_41528850_41529096	41528851	41529096	-1.186	Intron	-4138	ENSG00000147044	CASK	protein_coding	calcium/calmodulin dependent serine protein kinase
Chr1	1_158295857_158296057	158295858	158296057	-1.186	Distal Intergenic	4588	ENSG00000158481	CD1C	protein_coding	CD1c molecule
Chr1	1_37702976_37703187	37702977	37703187	-1.186	Intron	10461	ENSG00000134690	CDCA8	protein_coding	cell division cycle associated 8
Chr19	19_44520445_44520810	44520446	44520810	-1.186	Exon	8715	ENSG00000273777	CEACAM20	protein_coding	CEA cell adhesion molecule 20
Chr3	3_126539558_126539854	126539559	126539854	-1.186	Intron	15404	ENSG00000180767	CHST13	protein_coding	carbohydrate sulfotransferase 13
Chr19	19_33674735_33675061	33674736	33675061	-1.186	Intron	-9467	ENSG00000124302	CHST8	protein_coding	carbohydrate sulfotransferase 8
Chr17	17_7076026_7076226	7076027	7076226	-1.186	Promoter (<=1kb)	578	ENSG00000132514	CLEC10A	protein_coding	C-type lectin domain containing 10A
Chr1	1_178486250_178486574	178486251	178486574	-1.186	Promoter (<=1kb)	347	ENSG00000188585	CLEC20A	protein_coding	C-type lectin domain containing 20A
Chr18	18_74486131_74486331	74486132	74486331	-1.186	Distal Intergenic	-9485	ENSG00000133313	CNDP2	protein_coding	carnosine dipeptidase 2
Chr4	4_8635588_8635788	8635589	8635788	-1.186	Distal Intergenic	17497	ENSG00000109625	CPZ	protein_coding	carboxypeptidase Z
Chr5	5_138820108_138820326	138820109	138820326	-1.186	Intron	-4351	ENSG00000044115	CTNNA1	protein_coding	catenin alpha 1
Chr1	1_9888973_9889173	9888974	9889173	-1.186	Intron	4064	ENSG00000178585	CTNNBIP1	protein_coding	catenin beta interacting protein 1
Chr12	12_108865431_108865631	108865432	108865631	-1.186	Intron	6500	ENSG00000110887	DAO	protein_coding	D-amino acid oxidase
Chr12	12_51228818_51229047	51228819	51229047	-1.186	Distal Intergenic	-9677	ENSG00000183283	DAZAP2	protein_coding	DAZ associated protein 2
Chr8	8_141189535_141189899	141189536	141189899	-1.186	Promoter (<=1kb)	638	ENSG00000105339	DENND3	protein_coding	DENN domain containing 3
Chr20	20_36472791_36473012	36472792	36473012	-1.186	Promoter (<=1kb)	-107	ENSG00000080845	DLGAP4	protein_coding	DLG associated protein 4
Chr11	11_6498319_6498685	6498320	6498685	-1.186	Promoter (1-2kb)	1015	ENSG00000179532	DNHD1	protein_coding	dynein heavy chain domain 1
Chr2	2_108944696_108944896	108944697	108944896	-1.186	Intron	44324	ENSG00000135960	EDAR	protein_coding	ectodysplasin A receptor
Chr4	4_110571930_110572130	110571931	110572130	-1.186	Distal Intergenic	12823	ENSG00000138792	ENPEP	protein_coding	glutamyl aminopeptidase
Chr15	15_29570245_29570449	29570246	29570449	-1.186	Promoter (<=1kb)	-261	ENSG00000104059	ENTREP2	protein_coding	endosomal transmembrane epsin interactor 2
Chr1	1_22870431_22870631	22870432	22870631	-1.186	Intron	5273	ENSG00000133216	EPHB2	protein_coding	EPH receptor B2
Chr11	11_128568153_128568368	128568154	128568368	-1.186	Intron	19155	ENSG00000134954	ETS1	protein_coding	ETS proto-oncogene 1, transcription factor
Chr20	20_46962792_46962992	46962793	46962992	-1.186	Intron	-15243	ENSG00000064655	EYA2	protein_coding	EYA transcriptional coactivator and phosphatase 2
Chr6	6_170377852_170378052	170377853	170378052	-1.186	Intron	-26127	ENSG00000112584	FAM120B	protein_coding	family with sequence similarity 120 member B
Chr16	16_89759654_89759883	89759655	89759883	-1.186	Exon	5064	ENSG00000187741	FANCA	protein_coding	FA complementation group A
Chr12	12_117141363_117141563	117141364	117141563	-1.186	Exon	16465	ENSG00000135108	FBXO21	protein_coding	F-box protein 21
Chr5	5_171846412_171846648	171846413	171846648	-1.186	Distal Intergenic	22014	ENSG00000072803	FBXW11	protein_coding	F-box and WD repeat domain containing 11
Chr8	8_38496225_38496425	38496226	38496425	-1.186	Distal Intergenic	-27392	ENSG00000077782	FGFR1	protein_coding	fibroblast growth factor receptor 1
Chr13	13_28336585_28336901	28336586	28336901	-1.186	Intron	-8171	ENSG00000102755	FLT1	protein_coding	fms related receptor tyrosine kinase 1
Chr7	7_4683065_4683265	4683066	4683265	-1.186	Promoter (<=1kb)	771	ENSG00000164916	FOXK1	protein_coding	forkhead box K1
Chr16	16_88834416_88834667	88834417	88834667	-1.186	Intron	3182	ENSG00000141012	GALNS	protein_coding	galactosamine (N-acetyl)-6-sulfatase
Chr7	7_151166760_151166960	151166761	151166960	-1.186	Promoter (<=1kb)	734	ENSG00000164900	GBX1	protein_coding	gastrulation brain homeobox 1
Chr8	8_94300223_94300705	94300224	94300705	-1.186	Distal Intergenic	-37874	ENSG00000164949	GEM	protein_coding	GTP binding protein overexpressed in skeletal muscle
Chr7	7_2802845_2803380	2802846	2803380	-1.186	Intron	-7701	ENSG00000146535	GNA12	protein_coding	G protein subunit alpha 12
Chr3	3_141762444_141763121	141762445	141763121	-1.186	Promoter (<=1kb)	-287	ENSG00000114124	GRK7	protein_coding	G protein-coupled receptor kinase 7
Chr17	17_9821749_9821949	9821750	9821949	-1.186	Promoter (<=1kb)	130	ENSG00000214978	GSG1L2	protein_coding	GSG1 like 2
Chr2	2_239132183_239132420	239132184	239132420	-1.186	Intron	8553	ENSG00000068024	HDAC4	protein_coding	histone deacetylase 4
Chr10	10_92698697_92699024	92698698	92699024	-1.186	Distal Intergenic	6666	ENSG00000152804	HHEX	protein_coding	hematopoietically expressed homeobox
Chr2	2_10310611_10310811	10310612	10310811	-1.186	Intron	6912	ENSG00000115756	HPCAL1	protein_coding	hippocalcin like 1
ChrX	X_134468320_134468520	134468321	134468520	-1.186	Intron	-4854	ENSG00000165704	HPRT1	protein_coding	hypoxanthine phosphoribosyltransferase 1
Chr10	10_116674941_116675141	116674942	116675141	-1.186	3' UTR	3193	ENSG00000165868	HSPA12A	protein_coding	heat shock protein family A (Hsp70) member 12A
ChrX	X_53551360_53551560	53551361	53551560	-1.186	Promoter (1-2kb)	-1856	ENSG00000086758	HUWE1	protein_coding	HECT, UBA and WWE domain containing E3 ubiquitin protein ligase 1
Chr21	21_33285992_33286192	33285993	33286192	-1.186	Intron	9381	ENSG00000243646	IL10RB	protein_coding	interleukin 10 receptor subunit beta
Chr15	15_81197081_81197317	81197082	81197317	-1.186	Promoter (<=1kb)	203	ENSG00000172349	IL16	protein_coding	interleukin 16
Chr22	22_37149490_37149759	37149491	37149759	-1.186	Promoter (<=1kb)	138	ENSG00000100385	IL2RB	protein_coding	interleukin 2 receptor subunit beta
Chr11	11_9373799_9373999	9373800	9373999	-1.186	Distal Intergenic	-10653	ENSG00000205339	IPO7	protein_coding	importin 7
Chr2	2_236318099_236318299	236318100	236318299	-1.186	Distal Intergenic	13757	ENSG00000132321	IQCA1	protein_coding	IQ motif containing with AAA domain 1
Chr6	6_15487995_15488236	15487996	15488236	-1.186	Intron	-13122	ENSG00000008083	JARID2	protein_coding	jumonji and AT-rich interaction domain containing 2
Chr7	7_138970449_138970649	138970450	138970649	-1.186	Intron	10669	ENSG00000122778	KIAA1549	protein_coding	KIAA1549
Chr21	21_44568012_44568530	44568013	44568530	-1.186	Intron	-5199	ENSG00000215454	KRTAP10-4	protein_coding	keratin associated protein 10-4
Chr10	10_98267787_98267993	98267788	98267993	-1.186	Promoter (<=1kb)	201	ENSG00000138131	LOXL4	protein_coding	lysyl oxidase like 4
Chr17	17_64874407_64874607	64874408	64874607	-1.186	Promoter (2-3kb)	2423	ENSG00000176809	LRRC37A3	protein_coding	leucine rich repeat containing 37 member A3
Chr22	22_35637460_35637760	35637461	35637760	-1.186	Promoter (<=1kb)	191	ENSG00000198125	MB	protein_coding	myoglobin
Chr2	2_135869140_135869340	135869141	135869340	-1.186	Intron	-4090	ENSG00000076003	MCM6	protein_coding	minichromosome maintenance complex component 6
Chr22	22_41788235_41788435	41788236	41788435	-1.186	Intron	6501	ENSG00000167077	MEI1	protein_coding	meiotic double-stranded break formation protein 1
Chr11	11_68974241_68974590	68974242	68974590	-1.186	Distal Intergenic	6396	ENSG00000172938	MRGPRD	protein_coding	MAS related GPR family member D
Chr16	16_56669383_56669583	56669384	56669583	-1.186	Promoter (<=1kb)	-231	ENSG00000205358	MT1H	protein_coding	metallothionein 1H
Chr16	16_18539479_18539679	18539480	18539679	-1.186	Intron	3263	ENSG00000185164	NOMO2	protein_coding	NODAL modulator 2
Chr7	7_44530949_44531170	44530950	44531170	-1.186	Intron	10145	ENSG00000015520	NPC1L1	protein_coding	NPC1 like intracellular cholesterol transporter 1
Chr10	10_70284106_70284306	70284107	70284306	-1.186	Promoter (<=1kb)	-103	ENSG00000148734	NPFFR1	protein_coding	neuropeptide FF receptor 1
Chr16	16_67883772_67884033	67883773	67884033	-1.186	Promoter (<=1kb)	-852	ENSG00000188038	NRN1L	protein_coding	neuritin 1 like
Chr4	4_4361964_4362201	4361965	4362201	-1.186	Intron	13652	ENSG00000168824	NSG1	protein_coding	neuronal vesicle trafficking associated 1
Chr17	17_9163231_9163431	9163232	9163431	-1.186	Promoter (<=1kb)	297	ENSG00000065320	NTN1	protein_coding	netrin 1
Chr3	3_31871112_31871362	31871113	31871362	-1.186	Intron	-19602	ENSG00000144645	OSBPL10	protein_coding	oxysterol binding protein like 10
Chr15	15_31695791_31696062	31695792	31696062	-1.186	Intron	-40453	ENSG00000169918	OTUD7A	protein_coding	OTU deubiquitinase 7A
Chr12	12_79711172_79711379	79711173	79711379	-1.186	Intron	-20209	ENSG00000177425	PAWR	protein_coding	pro-apoptotic WT1 regulator
Chr10	10_100827727_100827978	100827728	100827978	-1.186	3' UTR	78878	ENSG00000075891	PAX2	protein_coding	paired box 2
Chr12	12_54569173_54569373	54569174	54569373	-1.186	3' UTR	-5384	ENSG00000123360	PDE1B	protein_coding	phosphodiesterase 1B
Chr11	11_72673657_72674222	72673658	72674222	-1.186	Promoter (<=1kb)	186	ENSG00000186642	PDE2A	protein_coding	phosphodiesterase 2A
Chr19	19_56839353_56839553	56839354	56839553	-1.186	Promoter (1-2kb)	1108	ENSG00000198300	PEG3	protein_coding	paternally expressed 3
Chr3	3_155750827_155751027	155750828	155751027	-1.186	Distal Intergenic	-5757	ENSG00000114805	PLCH1	protein_coding	phospholipase C eta 1
Chr1	1_242586787_242586987	242586788	242586987	-1.186	Distal Intergenic	-62091	ENSG00000180287	PLD5	protein_coding	phospholipase D family member 5
Chr14	14_69503376_69503676	69503377	69503676	-1.186	Exon	18649	ENSG00000175985	PLEKHD1	protein_coding	pleckstrin homology and coiled-coil domain containing D1
Chr2	2_207813598_207813798	207813599	207813798	-1.186	Distal Intergenic	8971	ENSG00000178385	PLEKHM3	protein_coding	pleckstrin homology domain containing M3
Chr3	3_146097041_146097259	146097042	146097259	-1.186	Intron	-4606	ENSG00000152952	PLOD2	protein_coding	procollagen-lysine,2-oxoglutarate 5-dioxygenase 2
ChrX	X_49172274_49172551	49172275	49172551	-1.186	Promoter (<=1kb)	349	ENSG00000102007	PLP2	protein_coding	proteolipid protein 2
Chr20	20_57691564_57691764	57691565	57691764	-1.186	Promoter (<=1kb)	66	ENSG00000124225	PMEPA1	protein_coding	prostate transmembrane protein, androgen induced 1
Chr4	4_80207298_80207576	80207299	80207576	-1.186	Distal Intergenic	9796	ENSG00000152784	PRDM8	protein_coding	PR/SET domain 8
ChrX	X_107619951_107620382	107619952	107620382	-1.186	Distal Intergenic	-8046	ENSG00000147224	PRPS1	protein_coding	phosphoribosyl pyrophosphate synthetase 1
Chr1	1_96729826_96730026	96729827	96730026	-1.186	Intron	7110	ENSG00000117569	PTBP2	protein_coding	polypyrimidine tract binding protein 2
Chr6	6_128194327_128194527	128194328	128194527	-1.186	Intron	37624	ENSG00000152894	PTPRK	protein_coding	protein tyrosine phosphatase receptor type K
ChrX	X_106138784_106139338	106138785	106139338	-1.186	Distal Intergenic	-28967	ENSG00000157502	PWWP3B	protein_coding	PWWP domain containing 3B
Chr5	5_146210806_146211006	146210807	146211006	-1.186	Intron	7202	ENSG00000091009	RBM27	protein_coding	RNA binding motif protein 27
Chr17	17_447807_448126	447808	448126	-1.186	Promoter (1-2kb)	-1869	ENSG00000183688	RFLNB	protein_coding	refilin B
Chr4	4_1092332_1092532	1092333	1092532	-1.186	Intron	7328	ENSG00000178222	RNF212	protein_coding	ring finger protein 212
Chr18	18_78986093_78986367	78986094	78986367	-1.186	Promoter (1-2kb)	1084	ENSG00000256463	SALL3	protein_coding	spalt like transcription factor 3
Chr3	3_38723476_38723799	38723477	38723799	-1.186	Exon	70243	ENSG00000185313	SCN10A	protein_coding	sodium voltage-gated channel alpha subunit 10
Chr11	11_75547701_75548213	75547702	75548213	-1.186	Distal Intergenic	-13843	ENSG00000149257	SERPINH1	protein_coding	serpin family H member 1
Chr5	5_176281889_176282089	176281890	176282089	-1.186	Intron	11660	ENSG00000170085	SIMC1	protein_coding	SUMO interacting motifs containing 1
Chr1	1_112948436_112948636	112948437	112948636	-1.186	Intron	7358	ENSG00000155380	SLC16A1	protein_coding	solute carrier family 16 member 1
Chr17	17_44258893_44259098	44258894	44259098	-1.186	Promoter (2-3kb)	2968	ENSG00000004939	SLC4A1	protein_coding	solute carrier family 4 member 1 (Diego blood group)
Chr1	1_214333296_214333561	214333297	214333561	-1.186	Promoter (2-3kb)	2320	ENSG00000143499	SMYD2	protein_coding	SET and MYND domain containing 2
Chr14	14_64823330_64823953	64823331	64823953	-1.186	Promoter (<=1kb)	-183	ENSG00000070182	SPTB	protein_coding	spectrin beta, erythrocytic
Chr1	1_54223550_54223750	54223551	54223750	-1.186	Intron	5705	ENSG00000157216	SSBP3	protein_coding	single stranded DNA binding protein 3
Chr2	2_152160534_152160849	152160535	152160849	-1.186	Intron	-10329	ENSG00000115145	STAM2	protein_coding	signal transducing adaptor molecule 2
Chr15	15_73973085_73973593	73973086	73973593	-1.186	Distal Intergenic	12907	ENSG00000067221	STOML1	protein_coding	stomatin like 1
Chr4	4_4438209_4438409	4438210	4438409	-1.186	Exon	-11597	ENSG00000168818	STX18	protein_coding	syntaxin 18
Chr1	1_167117454_167117654	167117455	167117654	-1.186	Exon	-8265	ENSG00000198842	STYXL2	protein_coding	serine/threonine/tyrosine interacting like 2
Chr20	20_24617095_24617431	24617096	24617431	-1.186	Intron	32194	ENSG00000101463	SYNDIG1	protein_coding	synapse differentiation inducing 1
Chr6	6_127791896_127792249	127791897	127792249	-1.186	Intron	108709	ENSG00000172673	THEMIS	protein_coding	thymocyte selection associated
Chr1	1_74528362_74528562	74528363	74528562	-1.186	Intron	-11693	ENSG00000116783	TNNI3K	protein_coding	TNNI3 interacting kinase
Chr20	20_45373521_45373738	45373522	45373738	-1.186	3' UTR	4587	ENSG00000124251	TP53TG5	protein_coding	TP53 target 5
Chr6	6_111606416_111606616	111606417	111606616	-1.186	Promoter (<=1kb)	-139	ENSG00000056972	TRAF3IP2	protein_coding	TRAF3 interacting protein 2
Chr9	9_98087417_98087760	98087418	98087760	-1.186	Promoter (<=1kb)	241	ENSG00000106785	TRIM14	protein_coding	tripartite motif containing 14
Chr1	1_33172458_33172978	33172459	33172978	-1.186	Intron	3572	ENSG00000116525	TRIM62	protein_coding	tripartite motif containing 62
Chr11	11_8640433_8640724	8640434	8640724	-1.186	Exon	7342	ENSG00000166436	TRIM66	protein_coding	tripartite motif containing 66
Chr4	4_98489632_98489832	98489633	98489832	-1.186	Intron	-4101	ENSG00000168785	TSPAN5	protein_coding	tetraspanin 5
Chr14	14_93706456_93706706	93706457	93706706	-1.186	Exon	17464	ENSG00000133958	UNC79	protein_coding	unc-79 homolog, NALCN channel complex subunit
Chr17	17_7477931_7478148	7477932	7478148	-1.186	Promoter (1-2kb)	1483	ENSG00000174282	ZBTB4	protein_coding	zinc finger and BTB domain containing 4
Chr5	5_837631_838129	837632	838129	-1.186	Intron	4366	ENSG00000188818	ZDHHC11	protein_coding	zinc finger DHHC-type containing 11
Chr1	1_93169799_93170632	93169800	93170632	-1.2059	Intron	-6590	ENSG00000117500	TMED5	protein_coding	transmembrane p24 trafficking protein 5
ChrX	X_153818866_153819247	153818867	153819247	-1.20985	Intron	10423	ENSG00000067840	PDZD4	protein_coding	PDZ domain containing 4
Chr17	17_75876963_75877169	75876964	75877169	-1.20985	Promoter (<=1kb)	95	ENSG00000132481	TRIM47	protein_coding	tripartite motif containing 47
Chr9	9_133103271_133103494	133103272	133103494	-1.21575	Promoter (<=1kb)	837	ENSG00000160271	RALGDS	protein_coding	ral guanine nucleotide dissociation stimulator
ChrX	X_49345881_49346404	49345882	49346404	-1.21842	Exon	4690	ENSG00000275113	GAGE2E	protein_coding	G antigen 2E
Chr12	12_52064309_52064561	52064310	52064561	-1.22163	Distal Intergenic	-4685	ENSG00000123395	ATG101	protein_coding	autophagy related 101
Chr20	20_38165316_38165551	38165317	38165551	-1.22163	Promoter (<=1kb)	-35	ENSG00000198959	TGM2	protein_coding	transglutaminase 2
Chr11	11_114035699_114036584	114035700	114036584	-1.22163	Distal Intergenic	-22457	ENSG00000109906	ZBTB16	protein_coding	zinc finger and BTB domain containing 16
Chr7	7_152828286_152828759	152828287	152828759	-1.22553	Intron	17545	ENSG00000133627	ACTR3B	protein_coding	actin related protein 3B
Chr8	8_60680442_60680652	60680443	60680652	-1.22553	Promoter (<=1kb)	580	ENSG00000171316	CHD7	protein_coding	chromodomain helicase DNA binding protein 7
Chr16	16_57795409_57795609	57795410	57795609	-1.22553	Promoter (2-3kb)	2155	ENSG00000140859	KIFC3	protein_coding	kinesin family member C3
Chr2	2_130128219_130128896	130128220	130128896	-1.22553	Promoter (<=1kb)	326	ENSG00000196604	POTEF	protein_coding	POTE ankyrin domain family member F
Chr17	17_82639550_82640018	82639551	82640018	-1.22553	Promoter (2-3kb)	-2968	ENSG00000141580	WDR45B	protein_coding	WD repeat domain 45B
Chr1	1_19338201_19338686	19338202	19338686	-1.2304	Downstream (<1kb)	7676	ENSG00000077549	CAPZB	protein_coding	capping actin protein of muscle Z-line subunit beta
Chr17	17_76529745_76529979	76529746	76529979	-1.2304	Promoter (<=1kb)	-753	ENSG00000161544	CYGB	protein_coding	cytoglobin
Chr7	7_102578031_102578231	102578032	102578231	-1.2304	Intron	-5379	ENSG00000168255	POLR2J3	protein_coding	RNA polymerase II subunit J3
Chr1	1_205978448_205978759	205978449	205978759	-1.2304	3' UTR	13821	ENSG00000276600	RAB7B	protein_coding	RAB7B, member RAS oncogene family
Chr20	20_49702510_49703064	49702511	49703064	-1.23663	Intron	10814	ENSG00000158470	B4GALT5	protein_coding	beta-1,4-galactosyltransferase 5
Chr15	15_42736228_42736473	42736229	42736473	-1.23663	Promoter (<=1kb)	581	ENSG00000140326	CDAN1	protein_coding	codanin 1
Chr14	14_103001329_103001615	103001330	103001615	-1.23663	Promoter (2-3kb)	2408	ENSG00000198752	CDC42BPB	protein_coding	CDC42 binding protein kinase beta
Chr16	16_3730914_3731150	3730915	3731150	-1.23663	Promoter (<=1kb)	100	ENSG00000005339	CREBBP	protein_coding	CREB binding protein
Chr1	1_155294530_155294835	155294531	155294835	-1.23663	Exon	5927	ENSG00000143630	HCN3	protein_coding	hyperpolarization activated cyclic nucleotide gated potassium channel 3
Chr17	17_58487419_58487954	58487420	58487954	-1.23663	Promoter (<=1kb)	454	ENSG00000176160	HSF5	protein_coding	heat shock transcription factor 5
Chr1	1_64860862_64861221	64860863	64861221	-1.23663	Intron	3635	ENSG00000162434	JAK1	protein_coding	Janus kinase 1
Chr2	2_240887111_240887378	240887112	240887378	-1.23663	Exon	4657	ENSG00000172478	MAB21L4	protein_coding	mab-21 like 4
Chr12	12_121634796_121635107	121634797	121635107	-1.23663	Intron	7981	ENSG00000276045	ORAI1	protein_coding	ORAI calcium release-activated calcium modulator 1
Chr5	5_60530335_60530825	60530336	60530825	-1.23663	Intron	-8216	ENSG00000113448	PDE4D	protein_coding	phosphodiesterase 4D
Chr6	6_37187041_37187407	37187042	37187407	-1.23663	Distal Intergenic	14548	ENSG00000137193	PIM1	protein_coding	Pim-1 proto-oncogene, serine/threonine kinase
ChrX	X_154472622_154472822	154472623	154472822	-1.23663	Promoter (1-2kb)	1776	ENSG00000130827	PLXNA3	protein_coding	plexin A3
Chr17	17_48429575_48430193	48429576	48430193	-1.23663	Promoter (<=1kb)	21	ENSG00000141293	SKAP1	protein_coding	src kinase associated phosphoprotein 1
Chr5	5_133995924_133996148	133995925	133996148	-1.23663	Intron	8487	ENSG00000213585	VDAC1	protein_coding	voltage dependent anion channel 1
Chr12	12_100672033_100672311	100672034	100672311	-1.2449	Distal Intergenic	-45215	ENSG00000151572	ANO4	protein_coding	anoctamin 4
Chr17	17_83039477_83039871	83039478	83039871	-1.2449	Intron	8911	ENSG00000175711	B3GNTL1	protein_coding	UDP-GlcNAc:betaGal beta-1,3-N-acetylglucosaminyltransferase like 1
Chr11	11_129344332_129344674	129344333	129344674	-1.2449	Distal Intergenic	-31174	ENSG00000043039	BARX2	protein_coding	BARX homeobox 2
Chr20	20_2691631_2691831	2691632	2691831	-1.2449	Promoter (<=1kb)	-949	ENSG00000088881	EBF4	protein_coding	EBF family member 4
Chr17	17_31130359_31130772	31130360	31130772	-1.2449	Promoter (1-2kb)	1902	ENSG00000196712	NF1	protein_coding	neurofibromin 1
Chr9	9_89498426_89498648	89498427	89498648	-1.2449	Promoter (<=1kb)	-297	ENSG00000187764	SEMA4D	protein_coding	semaphorin 4D
Chr11	11_222501_222726	222502	222726	-1.2449	3' UTR	7966	ENSG00000142082	SIRT3	protein_coding	sirtuin 3
Chr18	18_80098_80364	80099	80364	-1.2449	Exon	-6554	ENSG00000173213	TUBB8B	protein_coding	tubulin beta 8B
Chr3	3_23871366_23871647	23871367	23871647	-1.2449	Intron	5096	ENSG00000170142	UBE2E1	protein_coding	ubiquitin conjugating enzyme E2 E1
Chr3	3_184156029_184156482	184156030	184156482	-1.25013	Promoter (<=1kb)	-293	ENSG00000161202	DVL3	protein_coding	dishevelled segment polarity protein 3
Chr1	1_6589263_6589463	6589264	6589463	-1.25013	Promoter (<=1kb)	577	ENSG00000204859	ZBTB48	protein_coding	zinc finger and BTB domain containing 48
Chr5	5_344676_345518	344677	345518	-1.25129	Promoter (1-2kb)	1149	ENSG00000063438	AHRR	protein_coding	aryl hydrocarbon receptor repressor
Chr16	16_89860687_89861174	89860688	89861174	-1.25209	Promoter (<=1kb)	-792	ENSG00000204991	SPIRE2	protein_coding	spire type actin nucleation factor 2
Chr17	17_8718112_8718549	8718113	8718549	-1.25639	Distal Intergenic	26238	ENSG00000161973	CCDC42	protein_coding	coiled-coil domain containing 42
Chr1	1_86215465_86215850	86215466	86215850	-1.25639	Distal Intergenic	-58523	ENSG00000171502	COL24A1	protein_coding	collagen type XXIV alpha 1 chain
Chr19	19_15231588_15231788	15231589	15231788	-1.25639	Promoter (<=1kb)	660	ENSG00000105131	EPHX3	protein_coding	epoxide hydrolase 3
Chr19	19_39891613_39892042	39891614	39892042	-1.25639	Exon	-4322	ENSG00000275395	FCGBP	protein_coding	Fc gamma binding protein
Chr19	19_3133261_3133565	3133262	3133565	-1.25639	Promoter (2-3kb)	-2468	ENSG00000060558	GNA15	protein_coding	G protein subunit alpha 15
Chr10	10_97599471_97599680	97599472	97599680	-1.25639	Promoter (<=1kb)	-122	ENSG00000241935	HOGA1	protein_coding	4-hydroxy-2-oxoglutarate aldolase 1
Chr14	14_106627158_106627588	106627159	106627588	-1.25639	Promoter (<=1kb)	237	ENSG00000224373	IGHV4-59	IG_V_gene	immunoglobulin heavy variable 4-59
Chr19	19_50578214_50578596	50578215	50578596	-1.25639	Distal Intergenic	-9780	ENSG00000131409	LRRC4B	protein_coding	leucine rich repeat containing 4B
Chr2	2_47561035_47561282	47561036	47561282	-1.25639	Intron	5177	ENSG00000095002	MSH2	protein_coding	mutS homolog 2
Chr13	13_72946961_72947374	72946962	72947374	-1.25639	Intron	-22229	ENSG00000083535	PIBF1	protein_coding	progesterone immunomodulatory binding factor 1
Chr2	2_28538320_28538645	28538321	28538645	-1.25639	Exon	-9855	ENSG00000163803	PLB1	protein_coding	phospholipase B1
Chr5	5_180161240_180161516	180161241	180161516	-1.25639	Intron	-22892	ENSG00000146090	RASGEF1C	protein_coding	RasGEF domain family member 1C
Chr8	8_133039909_133040270	133039910	133040270	-1.25639	Promoter (<=1kb)	71	ENSG00000155926	SLA	protein_coding	Src like adaptor
Chr14	14_100305410_100305614	100305411	100305614	-1.25639	Promoter (<=1kb)	195	ENSG00000197119	SLC25A29	protein_coding	solute carrier family 25 member 29
Chr1	1_205914962_205915253	205914963	205915253	-1.25639	3' UTR	9492	ENSG00000174502	SLC26A9	protein_coding	solute carrier family 26 member 9
Chr20	20_46748096_46748466	46748097	46748466	-1.25639	Distal Intergenic	33630	ENSG00000197496	SLC2A10	protein_coding	solute carrier family 2 member 10
Chr1	1_9025689_9026036	9025690	9026036	-1.25639	Promoter (<=1kb)	387	ENSG00000197241	SLC2A7	protein_coding	solute carrier family 2 member 7
Chr3	3_10234710_10234983	10234711	10234983	-1.25639	Intron	-13040	ENSG00000157014	TATDN2	protein_coding	TatD DNase domain containing 2
ChrX	X_125287265_125287504	125287266	125287504	-1.25639	Distal Intergenic	-32367	ENSG00000282815	TEX13C	protein_coding	TEX13 family member C
Chr2	2_74492159_74492359	74492160	74492359	-1.25639	Promoter (<=1kb)	576	ENSG00000115282	TTC31	protein_coding	tetratricopeptide repeat domain 31
Chr16	16_84738320_84738704	84738321	84738704	-1.25639	Intron	5112	ENSG00000103194	USP10	protein_coding	ubiquitin specific peptidase 10
Chr4	4_1385242_1385471	1385243	1385471	-1.25639	Promoter (<=1kb)	431	ENSG00000163945	UVSSA	protein_coding	UV stimulated scaffold protein A
Chr8	8_63180399_63180700	63180400	63180700	-1.25639	Intron	-6830	ENSG00000185728	YTHDF3	protein_coding	YTH N6-methyladenosine RNA binding protein F3
Chr5	5_141672078_141672887	141672079	141672887	-1.26	Promoter (<=1kb)	273	ENSG00000120318	ARAP3	protein_coding	ArfGAP with RhoGAP domain, ankyrin repeat and PH domain 3
Chr18	18_7568230_7568681	7568231	7568681	-1.26129	Promoter (<=1kb)	915	ENSG00000173482	PTPRM	protein_coding	protein tyrosine phosphatase receptor type M
Chr22	22_37416647_37417056	37416648	37417056	-1.26401	Promoter (1-2kb)	1897	ENSG00000166897	ELFN2	protein_coding	extracellular leucine rich repeat and fibronectin type III domain containing 2
Chr21	21_37257645_37258171	37257646	37258171	-1.26401	Intron	8982	ENSG00000157538	VPS26C	protein_coding	VPS26 endosomal protein sorting factor C
Chr3	3_77038599_77038986	77038600	77038986	-1.26692	Promoter (<=1kb)	-900	ENSG00000185008	ROBO2	protein_coding	roundabout guidance receptor 2
Chr2	2_215182376_215182768	215182377	215182768	-1.27347	Intron	-43751	ENSG00000144452	ABCA12	protein_coding	ATP binding cassette subfamily A member 12
Chr1	1_229433066_229433405	229433067	229433405	-1.27347	Promoter (<=1kb)	689	ENSG00000143632	ACTA1	protein_coding	actin alpha 1, skeletal muscle
Chr2	2_73901438_73901644	73901439	73901644	-1.27347	3' UTR	8431	ENSG00000163017	ACTG2	protein_coding	actin gamma 2, smooth muscle
Chr1	1_110067546_110067752	110067547	110067752	-1.27347	Promoter (2-3kb)	-2623	ENSG00000156150	ALX3	protein_coding	ALX homeobox 3
Chr20	20_58205920_58206189	58205921	58206189	-1.27347	Distal Intergenic	22464	ENSG00000124227	ANKRD60	protein_coding	ankyrin repeat domain 60
Chr22	22_35648548_35648799	35648549	35648799	-1.27347	Promoter (<=1kb)	103	ENSG00000221963	APOL6	protein_coding	apolipoprotein L6
ChrX	X_15231716_15231935	15231717	15231935	-1.27347	Distal Intergenic	22830	ENSG00000102048	ASB9	protein_coding	ankyrin repeat and SOCS box containing 9
Chr6	6_16320086_16320820	16320087	16320820	-1.27347	Intron	7461	ENSG00000124788	ATXN1	protein_coding	ataxin 1
Chr22	22_29054266_29054632	29054267	29054632	-1.27347	3' UTR	7199	ENSG00000100249	C22orf31	protein_coding	chromosome 22 open reading frame 31
Chr17	17_50570864_50571064	50570865	50571064	-1.27347	Promoter (1-2kb)	1700	ENSG00000006283	CACNA1G	protein_coding	calcium voltage-gated channel subunit alpha1 G
Chr3	3_98837654_98838112	98837655	98838112	-1.27347	Intron	-18313	ENSG00000057019	DCBLD2	protein_coding	discoidin, CUB and LCCL domain containing 2
Chr2	2_3762861_3763096	3762862	3763096	-1.27347	Intron	36916	ENSG00000214866	DCDC2C	protein_coding	doublecortin domain containing 2C
Chr17	17_43006967_43007172	43006968	43007172	-1.27347	Promoter (<=1kb)	160	ENSG00000068079	IFI35	protein_coding	interferon induced protein 35
Chr17	17_45971798_45971998	45971799	45971998	-1.27347	Promoter (<=1kb)	-785	ENSG00000186868	MAPT	protein_coding	microtubule associated protein tau
Chr16	16_74700361_74700570	74700362	74700570	-1.27347	Promoter (<=1kb)	220	ENSG00000168404	MLKL	protein_coding	mixed lineage kinase domain like pseudokinase
Chr1	1_24112147_24112406	24112148	24112406	-1.27347	Promoter (<=1kb)	-13	ENSG00000142661	MYOM3	protein_coding	myomesin 3
Chr18	18_58322559_58322778	58322560	58322778	-1.27347	Promoter (<=1kb)	-527	ENSG00000049759	NEDD4L	protein_coding	NEDD4 like E3 ubiquitin protein ligase
Chr15	15_71746919_71747119	71746920	71747119	-1.27347	Exon	-45519	ENSG00000278570	NR2E3	protein_coding	nuclear receptor subfamily 2 group E member 3
Chr1	1_17371882_17372082	17371883	17372082	-1.27347	Promoter (<=1kb)	-114	ENSG00000276747	PADI6	protein_coding	peptidyl arginine deiminase 6
Chr1	1_18655436_18655660	18655437	18655660	-1.27347	Intron	23913	ENSG00000009709	PAX7	protein_coding	paired box 7
Chr11	11_101128632_101128886	101128633	101128886	-1.27347	Promoter (<=1kb)	184	ENSG00000082175	PGR	protein_coding	progesterone receptor
Chr11	11_67081505_67081705	67081506	67081705	-1.27347	Distal Intergenic	24617	ENSG00000173156	RHOD	protein_coding	ras homolog family member D
Chr5	5_82272946_82273310	82272947	82273310	-1.27347	Intron	4641	ENSG00000186468	RPS23	protein_coding	ribosomal protein S23
Chr17	17_80743396_80743596	80743397	80743596	-1.27347	Promoter (<=1kb)	110	ENSG00000141564	RPTOR	protein_coding	regulatory associated protein of MTOR complex 1
Chr22	22_23877646_23877846	23877647	23877846	-1.27347	Promoter (<=1kb)	-12	ENSG00000133460	SLC2A11	protein_coding	solute carrier family 2 member 11
Chr1	1_8329728_8329928	8329729	8329928	-1.27347	Promoter (<=1kb)	-210	ENSG00000162426	SLC45A1	protein_coding	solute carrier family 45 member 1
Chr7	7_102548029_102548229	102548030	102548229	-1.27347	Promoter (2-3kb)	-2997	ENSG00000205238	SPDYE2	protein_coding	speedy/RINGO cell cycle regulator family member E2
ChrX	X_123945782_123945982	123945783	123945982	-1.27347	Distal Intergenic	-14230	ENSG00000101972	STAG2	protein_coding	STAG2 cohesin complex component
Chr8	8_98650729_98651056	98650730	98651056	-1.27347	Promoter (<=1kb)	668	ENSG00000104375	STK3	protein_coding	serine/threonine kinase 3
Chr8	8_66940960_66941227	66940961	66941227	-1.27347	Distal Intergenic	13890	ENSG00000261787	TCF24	protein_coding	transcription factor 24
Chr3	3_196108175_196108554	196108176	196108554	-1.27347	Distal Intergenic	-26023	ENSG00000072274	TFRC	protein_coding	transferrin receptor
Chr10	10_119608828_119609261	119608829	119609261	-1.27347	Distal Intergenic	-11800	ENSG00000151923	TIAL1	protein_coding	TIA1 cytotoxic granule associated RNA binding protein like 1
Chr10	10_11538866_11539142	11538867	11539142	-1.27347	Intron	-6592	ENSG00000148429	USP6NL	protein_coding	USP6 N-terminal like
Chr6	6_148790614_148790814	148790615	148790814	-1.27347	Intron	43585	ENSG00000111962	UST	protein_coding	uronyl 2-sulfotransferase
Chr22	22_50381172_50381489	50381173	50381489	-1.28116	Intron	9101	ENSG00000100239	PPP6R2	protein_coding	protein phosphatase 6 regulatory subunit 2
Chr6	6_108838165_108838523	108838166	108838523	-1.28554	Distal Intergenic	-9893	ENSG00000118690	ARMC2	protein_coding	armadillo repeat containing 2
Chr16	16_21083571_21084035	21083572	21084035	-1.28554	Intron	-20572	ENSG00000158486	DNAH3	protein_coding	dynein axonemal heavy chain 3
Chr19	19_35074391_35074717	35074392	35074717	-1.28554	Intron	15249	ENSG00000105707	HPN	protein_coding	hepsin
Chr16	16_46757485_46757908	46757486	46757908	-1.28554	Intron	5338	ENSG00000140795	MYLK3	protein_coding	myosin light chain kinase 3
Chr5	5_132258632_132258838	132258633	132258838	-1.28554	Promoter (<=1kb)	926	ENSG00000131435	PDLIM4	protein_coding	PDZ and LIM domain 4
Chr3	3_51637154_51637692	51637155	51637692	-1.28554	Exon	6833	ENSG00000164080	RAD54L2	protein_coding	RAD54 like 2
Chr1	1_223231147_223231553	223231148	223231553	-1.28554	Promoter (<=1kb)	-401	ENSG00000143502	SUSD4	protein_coding	sushi domain containing 4
Chr3	3_11600552_11600936	11600553	11600936	-1.28554	Intron	3645	ENSG00000144560	VGLL4	protein_coding	vestigial like family member 4
Chr11	11_46725879_46726234	46725880	46726234	-1.29034	Promoter (2-3kb)	2700	ENSG00000180210	F2	protein_coding	coagulation factor II, thrombin
Chr14	14_102498730_102499117	102498731	102499117	-1.29034	Promoter (1-2kb)	1192	ENSG00000196663	TECPR2	protein_coding	tectonin beta-propeller repeat containing 2
Chr10	10_97759506_97759727	97759507	97759727	-1.29034	Promoter (1-2kb)	1865	ENSG00000155256	ZFYVE27	protein_coding	zinc finger FYVE-type containing 27
Chr13	13_46893924_46894549	46893925	46894549	-1.29292	Promoter (1-2kb)	1264	ENSG00000102468	HTR2A	protein_coding	5-hydroxytryptamine receptor 2A
Chr12	12_132500552_132500783	132500553	132500783	-1.29453	Intron	-6247	ENSG00000112787	FBRSL1	protein_coding	fibrosin like 1
Chr19	19_39070900_39071100	39070901	39071100	-1.30148	Distal Intergenic	-12813	ENSG00000183760	ACP7	protein_coding	acid phosphatase 7, tartrate resistant (putative)
Chr10	10_126387466_126387703	126387467	126387703	-1.30148	Promoter (<=1kb)	752	ENSG00000148848	ADAM12	protein_coding	ADAM metallopeptidase domain 12
Chr15	15_84817805_84818082	84817806	84818082	-1.30148	Promoter (<=1kb)	450	ENSG00000136383	ALPK3	protein_coding	alpha kinase 3
Chr18	18_31650961_31651161	31650962	31651161	-1.30148	Intron	7303	ENSG00000118276	B4GALT6	protein_coding	beta-1,4-galactosyltransferase 6
ChrX	X_15776139_15776339	15776140	15776339	-1.30148	Promoter (1-2kb)	1871	ENSG00000169239	CA5B	protein_coding	carbonic anhydrase 5B
Chr17	17_80182923_80183123	80182924	80183123	-1.30148	Promoter (<=1kb)	-869	ENSG00000141527	CARD14	protein_coding	caspase recruitment domain family member 14
Chr18	18_65709159_65709359	65709160	65709359	-1.30148	Distal Intergenic	-40893	ENSG00000081138	CDH7	protein_coding	cadherin 7
Chr3	3_126888801_126889257	126888802	126889257	-1.30148	Intron	33938	ENSG00000159685	CHCHD6	protein_coding	coiled-coil-helix-coiled-coil-helix domain containing 6
Chr11	11_74726408_74726608	74726409	74726608	-1.30148	Intron	4545	ENSG00000054938	CHRDL2	protein_coding	chordin like 2
Chr16	16_66680475_66680675	66680476	66680675	-1.30148	Intron	16032	ENSG00000183723	CMTM4	protein_coding	CKLF like MARVEL transmembrane domain containing 4
Chr7	7_146944595_146944795	146944596	146944795	-1.30148	Intron	-18097	ENSG00000174469	CNTNAP2	protein_coding	contactin associated protein 2
Chr13	13_110313794_110313994	110313795	110313994	-1.30148	Intron	6438	ENSG00000134871	COL4A2	protein_coding	collagen type IV alpha 2 chain
Chr4	4_182938444_182938689	182938445	182938689	-1.30148	Distal Intergenic	-20509	ENSG00000129187	DCTD	protein_coding	dCMP deaminase
Chr8	8_38243807_38244007	38243808	38244007	-1.30148	Promoter (1-2kb)	1580	ENSG00000085788	DDHD2	protein_coding	DDHD domain containing 2
Chr1	1_15644914_15645120	15644915	15645120	-1.30148	Intron	-6716	ENSG00000197312	DDI2	protein_coding	DNA damage inducible 1 homolog 2
Chr7	7_14313681_14313961	14313682	14313961	-1.30148	Intron	-44481	ENSG00000136267	DGKB	protein_coding	diacylglycerol kinase beta
ChrX	X_70494549_70494749	70494550	70494749	-1.30148	Promoter (2-3kb)	-2416	ENSG00000082458	DLG3	protein_coding	discs large MAGUK scaffold protein 3
Chr2	2_26948051_26948340	26948052	26948340	-1.30148	3' UTR	9593	ENSG00000157851	DPYSL5	protein_coding	dihydropyrimidinase like 5
Chr12	12_67658278_67658478	67658279	67658478	-1.30148	Exon	6810	ENSG00000127334	DYRK2	protein_coding	dual specificity tyrosine phosphorylation regulated kinase 2
Chr3	3_120450326_120450526	120450327	120450526	-1.30148	Promoter (<=1kb)	434	ENSG00000163430	FSTL1	protein_coding	follistatin like 1
Chr11	11_22652336_22652536	22652337	22652536	-1.30148	Intron	-14047	ENSG00000148935	GAS2	protein_coding	growth arrest specific 2
Chr3	3_42988583_42988783	42988584	42988783	-1.30148	Intron	9072	ENSG00000144649	GASK1A	protein_coding	golgi associated kinase 1A
Chr2	2_96031835_96032134	96031836	96032134	-1.30148	Promoter (<=1kb)	-986	ENSG00000186281	GPAT2	protein_coding	glycerol-3-phosphate acyltransferase 2, mitochondrial
Chr16	16_19899400_19899600	19899401	19899600	-1.30148	Distal Intergenic	-13234	ENSG00000167191	GPRC5B	protein_coding	G protein-coupled receptor class C group 5 member B
Chr6	6_616416_616616	616417	616616	-1.30148	Intron	40484	ENSG00000188996	HUS1B	protein_coding	HUS1 checkpoint clamp component B
Chr15	15_65402146_65402357	65402147	65402357	-1.30148	Exon	-5718	ENSG00000103742	IGDCC4	protein_coding	immunoglobulin superfamily DCC subclass member 4
Chr12	12_52701272_52701493	52701273	52701493	-1.30148	Promoter (1-2kb)	1970	ENSG00000189182	KRT77	protein_coding	keratin 77
Chr17	17_27577978_27578178	27577979	27578178	-1.30148	Promoter (<=1kb)	523	ENSG00000141068	KSR1	protein_coding	kinase suppressor of ras 1
Chr12	12_71420329_71420529	71420330	71420529	-1.30148	Intron	-19269	ENSG00000139292	LGR5	protein_coding	leucine rich repeat containing G protein-coupled receptor 5
Chr3	3_46454897_46455097	46454898	46455097	-1.30148	Promoter (<=1kb)	726	ENSG00000012223	LTF	protein_coding	lactotransferrin
Chr1	1_45922517_45922762	45922518	45922762	-1.30148	Intron	8871	ENSG00000086015	MAST2	protein_coding	microtubule associated serine/threonine kinase 2
ChrX	X_154799897_154800097	154799898	154800097	-1.30148	Promoter (<=1kb)	-83	ENSG00000130830	MPP1	protein_coding	MAGUK p55 scaffold protein 1
Chr6	6_42315719_42315937	42315720	42315937	-1.30148	Intron	-97859	ENSG00000048544	MRPS10	protein_coding	mitochondrial ribosomal protein S10
Chr11	11_65060094_65060294	65060095	65060294	-1.30148	Promoter (1-2kb)	-1542	ENSG00000168060	NAALADL1	protein_coding	N-acetylated alpha-linked acidic dipeptidase like 1
Chr3	3_175132952_175133152	175132953	175133152	-1.30148	Intron	8547	ENSG00000177694	NAALADL2	protein_coding	N-acetylated alpha-linked acidic dipeptidase like 2
Chr16	16_3564674_3564902	3564675	3564902	-1.30148	Exon	-7681	ENSG00000167984	NLRC3	protein_coding	NLR family CARD domain containing 3
Chr7	7_156973930_156974163	156973931	156974163	-1.30148	Distal Intergenic	5176	ENSG00000146909	NOM1	protein_coding	nucleolar protein with MIF4G domain 1
Chr17	17_47516681_47516881	47516682	47516881	-1.30148	Distal Intergenic	-6061	ENSG00000141279	NPEPPS	protein_coding	aminopeptidase puromycin sensitive
Chr3	3_23981158_23981358	23981159	23981358	-1.30148	Distal Intergenic	16395	ENSG00000174738	NR1D2	protein_coding	nuclear receptor subfamily 1 group D member 2
Chr13	13_78642587_78642787	78642588	78642787	-1.30148	Intron	16368	ENSG00000152193	OBI1	protein_coding	ORC ubiquitin ligase 1
Chr1	1_248067770_248067970	248067771	248067970	-1.30148	Distal Intergenic	11937	ENSG00000198128	OR2L3	protein_coding	olfactory receptor family 2 subfamily L member 3
Chr5	5_141432224_141432424	141432225	141432424	-1.30148	Promoter (1-2kb)	1636	ENSG00000253159	PCDHGA12	protein_coding	protocadherin gamma subfamily A, 12
Chr9	9_128712830_128713037	128712831	128713037	-1.30148	Promoter (<=1kb)	-80	ENSG00000160447	PKN3	protein_coding	protein kinase N3
Chr22	22_46171426_46171869	46171427	46171869	-1.30148	Promoter (<=1kb)	95	ENSG00000186951	PPARA	protein_coding	peroxisome proliferator activated receptor alpha
Chr18	18_9715036_9715236	9715037	9715236	-1.30148	Intron	6714	ENSG00000168461	RAB31	protein_coding	RAB31, member RAS oncogene family
Chr1	1_211469947_211470319	211469948	211470319	-1.30148	Distal Intergenic	21712	ENSG00000198570	RD3	protein_coding	RD3 regulator of GUCY2D
Chr5	5_179990350_179990585	179990351	179990585	-1.30148	Intron	-9833	ENSG00000113269	RNF130	protein_coding	ring finger protein 130
Chr7	7_3977336_3977536	3977337	3977536	-1.30148	Intron	5871	ENSG00000146555	SDK1	protein_coding	sidekick cell adhesion molecule 1
Chr6	6_2907385_2907585	2907386	2907585	-1.30148	Distal Intergenic	-4077	ENSG00000170542	SERPINB9	protein_coding	serpin family B member 9
Chr10	10_117126076_117126276	117126077	117126276	-1.30148	Promoter (<=1kb)	310	ENSG00000187164	SHTN1	protein_coding	shootin 1
Chr22	22_41883754_41883954	41883755	41883954	-1.30148	Promoter (1-2kb)	-1642	ENSG00000198911	SREBF2	protein_coding	sterol regulatory element binding transcription factor 2
Chr14	14_74440106_74440306	74440107	74440306	-1.30148	Distal Intergenic	-13897	ENSG00000183379	SYNDIG1L	protein_coding	synapse differentiation inducing 1 like
Chr6	6_13364656_13364899	13364657	13364899	-1.30148	3' UTR	-36074	ENSG00000145979	TBC1D7	protein_coding	TBC1 domain family member 7
Chr10	10_131444485_131444685	131444486	131444685	-1.30148	Distal Intergenic	-132765	ENSG00000176769	TCERG1L	protein_coding	transcription elongation regulator 1 like
Chr15	15_81367870_81368082	81367871	81368082	-1.30148	Intron	6074	ENSG00000188869	TMC3	protein_coding	transmembrane channel like 3
Chr4	4_68489481_68489770	68489482	68489770	-1.30148	Intron	27661	ENSG00000087128	TMPRSS11E	protein_coding	transmembrane serine protease 11E
Chr1	1_235114421_235114621	235114422	235114621	-1.30148	Intron	5278	ENSG00000173726	TOMM20	protein_coding	translocase of outer mitochondrial membrane 20
Chr14	14_21723837_21724084	21723838	21724084	-1.30148	Promoter (<=1kb)	125	ENSG00000211777	TRAV3	TR_V_gene	T cell receptor alpha variable 3
Chr20	20_35083984_35084185	35083985	35084185	-1.30148	Intron	8622	ENSG00000100991	TRPC4AP	protein_coding	transient receptor potential cation channel subfamily C member 4 associated protein
Chr10	10_71125443_71125643	71125444	71125643	-1.30148	Distal Intergenic	-86927	ENSG00000107731	UNC5B	protein_coding	unc-5 netrin receptor B
Chr19	19_37779178_37779388	37779179	37779388	-1.30148	Promoter (<=1kb)	165	ENSG00000189144	ZNF573	protein_coding	zinc finger protein 573
Chr3	3_48256248_48256448	48256249	48256448	-1.30148	Promoter (<=1kb)	-139	ENSG00000164048	ZNF589	protein_coding	zinc finger protein 589
Chr7	7_157411178_157411772	157411179	157411772	-1.31529	3' UTR	29358	ENSG00000105993	DNAJB6	protein_coding	DnaJ heat shock protein family (Hsp40) member B6
Chr14	14_105738470_105738692	105738471	105738692	-1.31529	Intron	4379	ENSG00000211896	IGHG1	IG_C_gene	immunoglobulin heavy constant gamma 1 (G1m marker)
Chr8	8_140949313_140949825	140949314	140949825	-1.31529	Intron	5010	ENSG00000169398	PTK2	protein_coding	protein tyrosine kinase 2
Chr20	20_689008_689531	689009	689531	-1.31529	Distal Intergenic	-13207	ENSG00000215397	SCRT2	protein_coding	scratch family transcriptional repressor 2
Chr9	9_134035720_134035920	134035721	134035920	-1.32351	Intron	5874	ENSG00000169925	BRD3	protein_coding	bromodomain containing 3
Chr1	1_1706613_1706912	1706614	1706912	-1.32351	Promoter (<=1kb)	649	ENSG00000008128	CDK11A	protein_coding	cyclin dependent kinase 11A
Chr6	6_31945338_31945538	31945339	31945538	-1.32351	Promoter (<=1kb)	-112	ENSG00000243649	CFB	protein_coding	complement factor B
Chr3	3_99637882_99638189	99637883	99638189	-1.32351	Promoter (<=1kb)	-286	ENSG00000144810	COL8A1	protein_coding	collagen type VIII alpha 1 chain
Chr2	2_72421906_72422289	72421907	72422289	-1.32351	Intron	-67629	ENSG00000144036	EXOC6B	protein_coding	exocyst complex component 6B
Chr3	3_46629994_46630199	46629995	46630199	-1.32351	Distal Intergenic	17470	ENSG00000283473	FAM240A	protein_coding	family with sequence similarity 240 member A
Chr10	10_114876186_114876493	114876187	114876493	-1.32351	Intron	15396	ENSG00000151553	FHIP2A	protein_coding	FHF complex subunit HOOK interacting protein 2A
Chr19	19_51312037_51312335	51312038	51312335	-1.32351	Promoter (<=1kb)	394	ENSG00000142549	IGLON5	protein_coding	IgLON family member 5
Chr19	19_35293470_35293752	35293471	35293752	-1.32351	Promoter (1-2kb)	1310	ENSG00000105695	MAG	protein_coding	myelin associated glycoprotein
Chr19	19_8568072_8568329	8568073	8568329	-1.32351	Intron	9104	ENSG00000142347	MYO1F	protein_coding	myosin IF
Chr9	9_125780178_125780571	125780179	125780571	-1.32351	Intron	29705	ENSG00000167081	PBX3	protein_coding	PBX homeobox 3
Chr7	7_151561543_151561892	151561544	151561892	-1.32351	Promoter (<=1kb)	24	ENSG00000106617	PRKAG2	protein_coding	protein kinase AMP-activated non-catalytic subunit gamma 2
Chr2	2_55120010_55120314	55120011	55120314	-1.32351	Distal Intergenic	-7390	ENSG00000115310	RTN4	protein_coding	reticulon 4
Chr10	10_103684174_103684427	103684175	103684427	-1.32351	Intron	-6011	ENSG00000107957	SH3PXD2A	protein_coding	SH3 and PX domains 2A
Chr22	22_48666536_48666823	48666537	48666823	-1.32351	Intron	-26424	ENSG00000219438	TAFA5	protein_coding	TAFA chemokine like family member 5
Chr7	7_5333478_5333678	5333479	5333678	-1.32351	Promoter (<=1kb)	-601	ENSG00000182095	TNRC18	protein_coding	trinucleotide repeat containing 18
Chr16	16_24609611_24609927	24609612	24609927	-1.32351	Promoter (<=1kb)	-282	ENSG00000090905	TNRC6A	protein_coding	trinucleotide repeat containing adaptor 6A
Chr11	11_65953539_65953810	65953540	65953810	-1.32351	Exon	7849	ENSG00000175513	TSGA10IP	protein_coding	testis specific 10 interacting protein
Chr14	14_20310164_20310600	20310165	20310600	-1.32351	Downstream (<1kb)	-4205	ENSG00000136319	TTC5	protein_coding	tetratricopeptide repeat domain 5
Chr3	3_183767179_183767624	183767180	183767624	-1.32351	Intron	-8367	ENSG00000163872	YEATS2	protein_coding	YEATS domain containing 2
ChrX	X_19372488_19372711	19372489	19372711	-1.33284	Promoter (<=1kb)	467	ENSG00000180815	MAP3K15	protein_coding	mitogen-activated protein kinase kinase kinase 15
Chr7	7_6755830_6756174	6755831	6756174	-1.33284	Promoter (1-2kb)	-1416	ENSG00000169402	RSPH10B2	protein_coding	radial spoke head 10 homolog B2
Chr7	7_6614971_6615171	6614972	6615171	-1.33284	Promoter (<=1kb)	-439	ENSG00000236609	ZNF853	protein_coding	zinc finger protein 853
Chr4	4_25862189_25862770	25862190	25862770	-1.33801	Promoter (<=1kb)	218	ENSG00000091490	SEL1L3	protein_coding	SEL1L family member 3
Chr2	2_236584024_236584224	236584025	236584224	-1.35593	Distal Intergenic	14200	ENSG00000144476	ACKR3	protein_coding	atypical chemokine receptor 3
ChrX	X_112819014_112819357	112819015	112819357	-1.35593	Intron	3179	ENSG00000126016	AMOT	protein_coding	angiomotin
Chr1	1_173669465_173669773	173669466	173669773	-1.35593	Promoter (<=1kb)	59	ENSG00000183831	ANKRD45	protein_coding	ankyrin repeat domain 45
ChrX	X_153566359_153566690	153566360	153566690	-1.35593	Promoter (1-2kb)	1356	ENSG00000067842	ATP2B3	protein_coding	ATPase plasma membrane Ca2+ transporting 3
Chr1	1_212724864_212725184	212724865	212725184	-1.35593	Downstream (<1kb)	-25025	ENSG00000123685	BATF3	protein_coding	basic leucine zipper ATF-like transcription factor 3
Chr9	9_137990381_137990581	137990382	137990581	-1.35593	Intron	-85288	ENSG00000148408	CACNA1B	protein_coding	calcium voltage-gated channel subunit alpha1 B
Chr13	13_20476218_20476418	20476219	20476418	-1.35593	Intron	13018	ENSG00000165475	CRYL1	protein_coding	crystallin lambda 1
Chr18	18_48870297_48870585	48870298	48870585	-1.35593	Distal Intergenic	7754	ENSG00000134030	CTIF	protein_coding	cap binding complex dependent translation initiation factor
Chr8	8_104326246_104326626	104326247	104326626	-1.35593	Distal Intergenic	-12461	ENSG00000164935	DCSTAMP	protein_coding	dendrocyte expressed seven transmembrane protein
Chr2	2_71586944_71587144	71586945	71587144	-1.35593	Promoter (1-2kb)	-1561	ENSG00000135636	DYSF	protein_coding	dysferlin
Chr2	2_3217949_3218178	3217950	3218178	-1.35593	Intron	-3498	ENSG00000032389	EIPR1	protein_coding	EARP complex and GARP complex interacting protein 1
Chr3	3_47536132_47536332	47536133	47536332	-1.35593	Distal Intergenic	-22421	ENSG00000163832	ELP6	protein_coding	elongator acetyltransferase complex subunit 6
Chr21	21_38699277_38699617	38699278	38699617	-1.35593	Distal Intergenic	-37498	ENSG00000157554	ERG	protein_coding	ETS transcription factor ERG
Chr5	5_172867247_172867498	172867248	172867498	-1.35593	Intron	-10777	ENSG00000113719	ERGIC1	protein_coding	endoplasmic reticulum-golgi intermediate compartment 1
Chr15	15_89297108_89297397	89297109	89297397	-1.35593	Promoter (1-2kb)	-1802	ENSG00000140525	FANCI	protein_coding	FA complementation group I
Chr19	19_8111237_8111451	8111238	8111451	-1.35593	Promoter (<=1kb)	355	ENSG00000142449	FBN3	protein_coding	fibrillin 3
Chr7	7_128675741_128675941	128675742	128675941	-1.35593	5' UTR	3443	ENSG00000205085	GARIN1A	protein_coding	golgi associated RAB2 interactor 1A
Chr11	11_134292665_134292973	134292666	134292973	-1.35593	Exon	5526	ENSG00000166105	GLB1L3	protein_coding	galactosidase beta 1 like 3
Chr20	20_43712086_43712367	43712087	43712367	-1.35593	Intron	14330	ENSG00000124196	GTSF1L	protein_coding	gametocyte specific factor 1 like
Chr1	1_41574575_41574775	41574576	41574775	-1.35593	Intron	5125	ENSG00000127124	HIVEP3	protein_coding	HIVEP zinc finger 3
Chr20	20_57501578_57502020	57501579	57502020	-1.35593	Intron	-6213	ENSG00000124097	HMGB1P1	protein_coding	high mobility group box 1 pseudogene 1
Chr1	1_24180746_24180968	24180747	24180968	-1.35593	5' UTR	6280	ENSG00000185436	IFNLR1	protein_coding	interferon lambda receptor 1
Chr3	3_48701220_48701420	48701221	48701420	-1.35593	Intron	-5633	ENSG00000068745	IP6K2	protein_coding	inositol hexakisphosphate kinase 2
Chr15	15_90503715_90503915	90503716	90503915	-1.35593	Distal Intergenic	7002	ENSG00000140575	IQGAP1	protein_coding	IQ motif containing GTPase activating protein 1
Chr3	3_13261173_13261373	13261174	13261373	-1.35593	Intron	21908	ENSG00000144711	IQSEC1	protein_coding	IQ motif and Sec7 domain ArfGEF 1
Chr19	19_54367534_54367734	54367535	54367734	-1.35593	Promoter (<=1kb)	865	ENSG00000167613	LAIR1	protein_coding	leukocyte associated immunoglobulin like receptor 1
Chr15	15_77810217_77810472	77810218	77810472	-1.35593	Intron	8980	ENSG00000169783	LINGO1	protein_coding	leucine rich repeat and Ig domain containing 1
Chr12	12_112986380_112986687	112986381	112986687	-1.35593	Intron	7787	ENSG00000111335	OAS2	protein_coding	2'-5'-oligoadenylate synthetase 2
Chr12	12_120342114_120342377	120342115	120342377	-1.35593	3' UTR	-14336	ENSG00000170890	PLA2G1B	protein_coding	phospholipase A2 group IB
Chr1	1_15683944_15684211	15683945	15684211	-1.35593	Promoter (<=1kb)	-109	ENSG00000116786	PLEKHM2	protein_coding	pleckstrin homology and RUN domain containing M2
Chr1	1_154910829_154911079	154910830	154911079	-1.35593	Distal Intergenic	25640	ENSG00000163344	PMVK	protein_coding	phosphomevalonate kinase
Chr8	8_43111369_43111667	43111370	43111667	-1.35593	Intron	7842	ENSG00000185900	POMK	protein_coding	protein O-mannose kinase
Chr11	11_45153197_45153397	45153198	45153397	-1.35593	Intron	5855	ENSG00000019485	PRDM11	protein_coding	PR/SET domain 11
Chr8	8_47841788_47842003	47841789	47842003	-1.35593	Intron	3817	ENSG00000253729	PRKDC	protein_coding	protein kinase, DNA-activated, catalytic subunit
Chr15	15_79057041_79057278	79057042	79057278	-1.35593	Intron	7385	ENSG00000058335	RASGRF1	protein_coding	Ras protein specific guanine nucleotide releasing factor 1
Chr1	1_243332519_243332806	243332520	243332806	-1.35593	Intron	-5947	ENSG00000054282	SDCCAG8	protein_coding	SHH signaling and ciliogenesis regulator SDCCAG8
Chr3	3_9475643_9476155	9475644	9476155	-1.35593	Promoter (<=1kb)	594	ENSG00000168137	SETD5	protein_coding	SET domain containing 5
ChrX	X_19588877_19589303	19588878	19589303	-1.35593	Intron	-19356	ENSG00000147010	SH3KBP1	protein_coding	SH3 domain containing kinase binding protein 1
Chr6	6_83570960_83571160	83570961	83571160	-1.35593	Intron	9346	ENSG00000065609	SNAP91	protein_coding	synaptosome associated protein 91
Chr2	2_45501537_45501761	45501538	45501761	-1.35593	Intron	47311	ENSG00000068784	SRBD1	protein_coding	S1 RNA binding domain 1
Chr17	17_17956525_17956866	17956526	17956866	-1.35593	Intron	15531	ENSG00000175662	TOM1L2	protein_coding	target of myb1 like 2 membrane trafficking protein
Chr1	1_225939722_225940050	225939723	225940050	-1.37043	Promoter (<=1kb)	51	ENSG00000143768	LEFTY2	protein_coding	left-right determination factor 2
Chr10	10_122504562_122504877	122504563	122504877	-1.37363	Promoter (1-2kb)	-1814	ENSG00000166033	HTRA1	protein_coding	HtrA serine peptidase 1
Chr22	22_38956147_38956347	38956148	38956347	-1.37865	Promoter (1-2kb)	-1175	ENSG00000128383	APOBEC3A	protein_coding	apolipoprotein B mRNA editing enzyme catalytic subunit 3A
Chr3	3_113285229_113285639	113285230	113285639	-1.37865	Promoter (<=1kb)	670	ENSG00000144857	BOC	protein_coding	BOC cell adhesion associated, oncogene regulated
Chr12	12_52952157_52952357	52952158	52952357	-1.37865	Promoter (<=1kb)	416	ENSG00000111057	KRT18	protein_coding	keratin 18
Chr20	20_46009939_46010200	46009940	46010200	-1.37865	Promoter (1-2kb)	1032	ENSG00000100985	MMP9	protein_coding	matrix metallopeptidase 9
Chr15	15_40847500_40847934	40847501	40847934	-1.37865	Promoter (2-3kb)	2826	ENSG00000166145	SPINT1	protein_coding	serine peptidase inhibitor, Kunitz type 1
Chr7	7_98871131_98871394	98871132	98871394	-1.37865	Promoter (<=1kb)	-361	ENSG00000166448	TMEM130	protein_coding	transmembrane protein 130
Chr3	3_114812477_114812930	114812478	114812930	-1.37865	Intron	-11301	ENSG00000181722	ZBTB20	protein_coding	zinc finger and BTB domain containing 20
Chr13	13_51118888_51119232	51118889	51119232	-1.38764	Intron	-7615	ENSG00000226792	C13orf42	protein_coding	chromosome 13 open reading frame 42
Chr1	1_16922047_16922353	16922048	16922353	-1.38764	Promoter (<=1kb)	117	ENSG00000058453	CROCC	protein_coding	ciliary rootlet coiled-coil, rootletin
Chr11	11_75531349_75531660	75531350	75531660	-1.38764	Distal Intergenic	-5409	ENSG00000158555	GDPD5	protein_coding	glycerophosphodiester phosphodiesterase domain containing 5
Chr20	20_62204434_62204634	62204435	62204634	-1.38764	Promoter (1-2kb)	1696	ENSG00000101181	MTG2	protein_coding	mitochondrial ribosome associated GTPase 2
Chr9	9_116154370_116154840	116154371	116154840	-1.38764	Promoter (<=1kb)	580	ENSG00000182752	PAPPA	protein_coding	pappalysin 1
Chr22	22_21673602_21673819	21673603	21673819	-1.38764	Promoter (1-2kb)	1273	ENSG00000100023	PPIL2	protein_coding	peptidylprolyl isomerase like 2
Chr5	5_1422355_1422718	1422356	1422718	-1.38764	Intron	-5778	ENSG00000142319	SLC6A3	protein_coding	solute carrier family 6 member 3
Chr6	6_157954894_157955198	157954895	157955198	-1.38764	Distal Intergenic	16948	ENSG00000130340	SNX9	protein_coding	sorting nexin 9
Chr5	5_137498084_137498387	137498085	137498387	-1.38764	Promoter (<=1kb)	207	ENSG00000152377	SPOCK1	protein_coding	SPARC (osteonectin), cwcv and kazal like domains proteoglycan 1
Chr1	1_62412063_62412424	62412064	62412424	-1.38764	Distal Intergenic	-23873	ENSG00000162607	USP1	protein_coding	ubiquitin specific peptidase 1
Chr3	3_38376193_38376462	38376194	38376462	-1.38764	Promoter (<=1kb)	-459	ENSG00000093217	XYLB	protein_coding	xylulokinase
Chr1	1_28754404_28754706	28754405	28754706	-1.38764	Intron	15314	ENSG00000198492	YTHDF2	protein_coding	YTH N6-methyladenosine RNA binding protein F2
Chr9	9_134012284_134012593	134012285	134012593	-1.39546	Distal Intergenic	-12888	ENSG00000235106	BRD3OS	protein_coding	BRD3 opposite strand
Chr5	5_138445021_138445300	138445022	138445300	-1.39546	Promoter (<=1kb)	24	ENSG00000132563	REEP2	protein_coding	receptor accessory protein 2
Chr12	12_21942064_21942509	21942065	21942509	-1.4084	Promoter (<=1kb)	20	ENSG00000069431	ABCC9	protein_coding	ATP binding cassette subfamily C member 9
Chr5	5_149142119_149142333	149142120	149142333	-1.4084	Promoter (<=1kb)	73	ENSG00000173210	ABLIM3	protein_coding	actin binding LIM protein family member 3
Chr5	5_132915204_132915404	132915205	132915404	-1.4084	Intron	12158	ENSG00000072364	AFF4	protein_coding	ALF transcription elongation factor 4
Chr7	7_15256387_15256587	15256388	15256587	-1.4084	Intron	109600	ENSG00000187546	AGMO	protein_coding	alkylglycerol monooxygenase
Chr7	7_91950330_91950530	91950331	91950530	-1.4084	Intron	9231	ENSG00000127914	AKAP9	protein_coding	A-kinase anchoring protein 9
ChrX	X_47571020_47571523	47571021	47571523	-1.4084	Promoter (1-2kb)	1035	ENSG00000078061	ARAF	protein_coding	A-Raf proto-oncogene, serine/threonine kinase
Chr12	12_111507422_111507657	111507423	111507657	-1.4084	Promoter (2-3kb)	2838	ENSG00000204842	ATXN2	protein_coding	ataxin 2
Chr6	6_90011609_90011809	90011610	90011809	-1.4084	Promoter (2-3kb)	-2783	ENSG00000112182	BACH2	protein_coding	BTB domain and CNC homolog 2
Chr2	2_127118113_127118313	127118114	127118313	-1.4084	Distal Intergenic	-10826	ENSG00000136717	BIN1	protein_coding	bridging integrator 1
Chr20	20_33036519_33036719	33036520	33036719	-1.4084	3' UTR	4872	ENSG00000167104	BPIFB6	protein_coding	BPI fold containing family B member 6
Chr8	8_90098170_90098370	90098171	90098370	-1.4084	Promoter (2-3kb)	-2696	ENSG00000104327	CALB1	protein_coding	calbindin 1
Chr17	17_64541033_64541263	64541034	64541263	-1.4084	Intron	4175	ENSG00000258890	CEP95	protein_coding	centrosomal protein 95
Chr3	3_113441015_113441388	113441016	113441388	-1.4084	Promoter (<=1kb)	105	ENSG00000206530	CFAP44	protein_coding	cilia and flagella associated protein 44
Chr11	11_68066601_68066801	68066602	68066801	-1.4084	Promoter (<=1kb)	-142	ENSG00000110721	CHKA	protein_coding	choline kinase alpha
Chr8	8_96719439_96719644	96719440	96719644	-1.4084	Intron	-12648	ENSG00000104324	CPQ	protein_coding	carboxypeptidase Q
Chr2	2_15611890_15612243	15611891	15612243	-1.4084	Intron	13395	ENSG00000079785	DDX1	protein_coding	DEAD-box helicase 1
Chr20	20_35153745_35153973	35153746	35153973	-1.4084	Distal Intergenic	-6410	ENSG00000088298	EDEM2	protein_coding	ER degradation enhancing alpha-mannosidase like protein 2
Chr1	1_50620875_50621125	50620876	50621125	-1.4084	Intron	-13932	ENSG00000185104	FAF1	protein_coding	Fas associated factor 1
Chr18	18_36594043_36594243	36594044	36594243	-1.4084	Promoter (<=1kb)	-543	ENSG00000134775	FHOD3	protein_coding	formin homology 2 domain containing 3
Chr11	11_68692760_68693347	68692761	68693347	-1.4084	Distal Intergenic	8217	ENSG00000069482	GAL	protein_coding	galanin and GMAP prepropeptide
Chr7	7_44188075_44188478	44188076	44188478	-1.4084	Promoter (<=1kb)	509	ENSG00000106633	GCK	protein_coding	glucokinase
Chr1	1_6259595_6259795	6259596	6259795	-1.4084	Promoter (1-2kb)	1303	ENSG00000158292	GPR153	protein_coding	G protein-coupled receptor 153
ChrX	X_114584340_114584540	114584341	114584540	-1.4084	Promoter (<=1kb)	255	ENSG00000147246	HTR2C	protein_coding	5-hydroxytryptamine receptor 2C
Chr4	4_128852987_128853287	128852988	128853287	-1.4084	Intron	21555	ENSG00000077684	JADE1	protein_coding	jade family PHD finger 1
Chr6	6_17815153_17815574	17815154	17815574	-1.4084	Promoter (1-2kb)	1616	ENSG00000137177	KIF13A	protein_coding	kinesin family member 13A
Chr4	4_154743774_154743974	154743775	154743974	-1.4084	Promoter (<=1kb)	-26	ENSG00000121207	LRAT	protein_coding	lecithin retinol acyltransferase
Chr14	14_39339192_39339392	39339193	39339392	-1.4084	Intron	-8153	ENSG00000150527	MIA2	protein_coding	MIA SH3 domain ER export factor 2
Chr2	2_237525739_237525939	237525740	237525939	-1.4084	Promoter (<=1kb)	12	ENSG00000115648	MLPH	protein_coding	melanophilin
Chr12	12_85865983_85866190	85865984	85866190	-1.4084	Distal Intergenic	-8105	ENSG00000133636	NTS	protein_coding	neurotensin
Chr1	1_17069092_17069292	17069093	17069292	-1.4084	Exon	6059	ENSG00000117115	PADI2	protein_coding	peptidyl arginine deiminase 2
Chr7	7_154972929_154973129	154972930	154973129	-1.4084	Promoter (1-2kb)	1494	ENSG00000157212	PAXIP1	protein_coding	PAX interacting protein 1
Chr1	1_153307269_153307592	153307270	153307592	-1.4084	Intron	3126	ENSG00000159527	PGLYRP3	protein_coding	peptidoglycan recognition protein 3
Chr15	15_98980808_98981008	98980809	98981008	-1.4084	Intron	24454	ENSG00000183571	PGPEP1L	protein_coding	pyroglutamyl-peptidase I like
Chr1	1_151321494_151321694	151321495	151321694	-1.4084	Intron	5683	ENSG00000143393	PI4KB	protein_coding	phosphatidylinositol 4-kinase beta
Chr16	16_81929040_81929246	81929041	81929246	-1.4084	Promoter (1-2kb)	-1495	ENSG00000197943	PLCG2	protein_coding	phospholipase C gamma 2
Chr20	20_48698286_48698515	48698287	48698515	-1.4084	Intron	-5603	ENSG00000124126	PREX1	protein_coding	phosphatidylinositol-3,4,5-trisphosphate dependent Rac exchange factor 1
Chr6	6_42698259_42698459	42698260	42698459	-1.4084	3' UTR	24138	ENSG00000112619	PRPH2	protein_coding	peripherin 2
Chr9	9_124387003_124387203	124387004	124387203	-1.4084	Promoter (2-3kb)	-2348	ENSG00000136930	PSMB7	protein_coding	proteasome 20S subunit beta 7
Chr12	12_131779031_131779231	131779032	131779231	-1.4084	Intron	-4237	ENSG00000061936	SFSWAP	protein_coding	splicing factor SWAP
Chr6	6_35956282_35956482	35956283	35956482	-1.4084	Intron	12413	ENSG00000112053	SLC26A8	protein_coding	solute carrier family 26 member 8
Chr18	18_11610182_11610411	11610183	11610411	-1.4084	Promoter (<=1kb)	587	ENSG00000236396	SLC35G4	protein_coding	solute carrier family 35 member G4
Chr8	8_42575194_42575457	42575195	42575457	-1.4084	Distal Intergenic	28767	ENSG00000176209	SMIM19	protein_coding	small integral membrane protein 19
Chr9	9_15441851_15442292	15441852	15442292	-1.4084	Intron	-4820	ENSG00000164975	SNAPC3	protein_coding	small nuclear RNA activating complex polypeptide 3
Chr9	9_88120778_88120990	88120779	88120990	-1.4084	Distal Intergenic	13995	ENSG00000177910	SPATA31C2	protein_coding	SPATA31 subfamily C member 2
Chr6	6_43160909_43161109	43160910	43161109	-1.4084	3' UTR	-10160	ENSG00000112658	SRF	protein_coding	serum response factor
Chr4	4_16221174_16221374	16221175	16221374	-1.4084	Intron	4656	ENSG00000169762	TAPT1	protein_coding	transmembrane anterior posterior transformation 1
Chr3	3_196335530_196335834	196335531	196335834	-1.4084	Promoter (2-3kb)	2539	ENSG00000273331	TM4SF19-DYNLT2B	protein_coding	TM4SF19-DYNLT2B readthrough (NMD candidate)
Chr2	2_192314747_192315322	192314748	192315322	-1.4084	Distal Intergenic	-119815	ENSG00000144339	TMEFF2	protein_coding	transmembrane protein with EGF like and two follistatin like domains 2
Chr1	1_175079352_175079730	175079353	175079730	-1.4084	Promoter (1-2kb)	1934	ENSG00000120332	TNN	protein_coding	tenascin N
Chr11	11_5589968_5590168	5589969	5590168	-1.4084	Exon	-5941	ENSG00000121236	TRIM6	protein_coding	tripartite motif containing 6
Chr3	3_101551095_101551295	101551096	101551295	-1.4084	Distal Intergenic	-10573	ENSG00000174173	TRMT10C	protein_coding	tRNA methyltransferase 10C, mitochondrial RNase P subunit
Chr13	13_75558992_75559271	75558993	75559271	-1.4084	Intron	-7439	ENSG00000118939	UCHL3	protein_coding	ubiquitin C-terminal hydrolase L3
Chr7	7_55525345_55525603	55525346	55525603	-1.4084	Promoter (1-2kb)	1419	ENSG00000154978	VOPP1	protein_coding	VOPP1 WW domain binding protein
Chr14	14_67667650_67667850	67667651	67667850	-1.4084	Intron	6760	ENSG00000100568	VTI1B	protein_coding	vesicle transport through interaction with t-SNAREs 1B
Chr16	16_50309796_50310140	50309797	50310140	-1.41866	Promoter (2-3kb)	-2964	ENSG00000121281	ADCY7	protein_coding	adenylate cyclase 7
Chr19	19_3055663_3056071	3055664	3056071	-1.41866	Promoter (<=1kb)	125	ENSG00000104964	TLE5	protein_coding	TLE family member 5, transcriptional modulator
Chr21	21_36459549_36459798	36459550	36459798	-1.42304	Intron	6643	ENSG00000159261	CLDN14	protein_coding	claudin 14
Chr22	22_37062896_37063096	37062897	37063096	-1.42304	3' UTR	5499	ENSG00000100379	KCTD17	protein_coding	potassium channel tetramerization domain containing 17
Chr11	11_485322_485604	485323	485604	-1.42304	Promoter (1-2kb)	-1635	ENSG00000174915	PTDSS2	protein_coding	phosphatidylserine synthase 2
Chr17	17_139694_140052	139695	140052	-1.42304	Promoter (2-3kb)	2126	ENSG00000268320	SCGB1C2	protein_coding	secretoglobin family 1C member 2
Chr14	14_91303226_91303689	91303227	91303689	-1.42701	Intron	-12156	ENSG00000015133	CCDC88C	protein_coding	coiled-coil domain containing 88C
Chr10	10_101779861_101780085	101779862	101780085	-1.42886	Promoter (<=1kb)	286	ENSG00000107831	FGF8	protein_coding	fibroblast growth factor 8
Chr2	2_127885082_127885282	127885083	127885282	-1.43393	Promoter (<=1kb)	-223	ENSG00000144233	AMMECR1L	protein_coding	AMMECR1 like
Chr1	1_150268323_150268534	150268324	150268534	-1.43393	Promoter (<=1kb)	32	ENSG00000117362	APH1A	protein_coding	aph-1 homolog A, gamma-secretase subunit
Chr1	1_46930050_46930431	46930051	46930431	-1.43393	3' UTR	3815	ENSG00000187048	CYP4A11	protein_coding	cytochrome P450 family 4 subfamily A member 11
Chr13	13_113483537_113483916	113483538	113483916	-1.43393	Promoter (<=1kb)	80	ENSG00000150401	DCUN1D2	protein_coding	defective in cullin neddylation 1 domain containing 2
Chr5	5_161548631_161549017	161548632	161549017	-1.43393	Promoter (<=1kb)	27	ENSG00000145864	GABRB2	protein_coding	gamma-aminobutyric acid type A receptor subunit beta2
[truncated: 905 more rows]
